# Supplementary material for: Hidden sodium in effervescent-tablet dietary supplements and over-the-counter drugs: a comparative cross-sectional study
Source: PubMed Central journal article supplement — BMJ Open. 2023 Nov 27;13(11):e076302. doi: 10.1136/bmjopen-2023-076302 (PMC10685933; doi:10.1136/bmjopen-2023-076302), 2023-11-27
Supplement: bmjopen-2023-076302.draft_revisions.pdf [file bmjopen-2023-076302.draft_revisions.pdf]

# BMJ Open

BMJ Open is committed to open peer review. As part of this commitment we make the peer review history of every article we publish publicly available.

When an article is published we post the peer reviewers' comments and the authors' responses online. We also post the versions of the paper that were used during peer review. These are the versions that the peer review comments apply to.

The versions of the paper that follow are the versions that were submitted during the peer review process. They are not the versions of record or the final published versions. They should not be cited or distributed as the published version of this manuscript.

BMJ Open is an open access journal and the full, final, typeset and author-corrected version of record of the manuscript is available on our site with no access controls, subscription charges or pay-per-view fees (<http://bmjopen.bmj.com>).

If you have any questions on BMJ Open's open peer review process please email [info.bmjopen@bmj.com](mailto:info.bmjopen@bmj.com)

# BMJ Open

## Sodium content of dietary supplements and over-the-counter medication effervescent tablets

|                               |                                                                                                                                                                                                                                                                                                                                                                                                                                                                                                                                                                                                                                                                                                                                                                                                                                                                                                                                                                                                                                                                                                                                                                                                                                                                                                                                                                                                                                                                                                                                                                                                  |
|-------------------------------|--------------------------------------------------------------------------------------------------------------------------------------------------------------------------------------------------------------------------------------------------------------------------------------------------------------------------------------------------------------------------------------------------------------------------------------------------------------------------------------------------------------------------------------------------------------------------------------------------------------------------------------------------------------------------------------------------------------------------------------------------------------------------------------------------------------------------------------------------------------------------------------------------------------------------------------------------------------------------------------------------------------------------------------------------------------------------------------------------------------------------------------------------------------------------------------------------------------------------------------------------------------------------------------------------------------------------------------------------------------------------------------------------------------------------------------------------------------------------------------------------------------------------------------------------------------------------------------------------|
| Journal:                      | <i>BMJ Open</i>                                                                                                                                                                                                                                                                                                                                                                                                                                                                                                                                                                                                                                                                                                                                                                                                                                                                                                                                                                                                                                                                                                                                                                                                                                                                                                                                                                                                                                                                                                                                                                                  |
| Manuscript ID                 | bmjopen-2023-076302                                                                                                                                                                                                                                                                                                                                                                                                                                                                                                                                                                                                                                                                                                                                                                                                                                                                                                                                                                                                                                                                                                                                                                                                                                                                                                                                                                                                                                                                                                                                                                              |
| Article Type:                 | Original research                                                                                                                                                                                                                                                                                                                                                                                                                                                                                                                                                                                                                                                                                                                                                                                                                                                                                                                                                                                                                                                                                                                                                                                                                                                                                                                                                                                                                                                                                                                                                                                |
| Date Submitted by the Author: | 03-Jun-2023                                                                                                                                                                                                                                                                                                                                                                                                                                                                                                                                                                                                                                                                                                                                                                                                                                                                                                                                                                                                                                                                                                                                                                                                                                                                                                                                                                                                                                                                                                                                                                                      |
| Complete List of Authors:     | <p>Kunz , Michael; Universitätsklinikum des Saarlandes und Medizinische Fakultät der Universität des Saarlandes, Department of Internal Medicine III Cardiology, Angiology and Intensive Care Medicine</p> <p>Götzinger, Felix; Universitätsklinikum des Saarlandes und Medizinische Fakultät der Universität des Saarlandes, Department of Internal Medicine III Cardiology, Angiology and Intensive Care Medicine</p> <p>Jacobs, Cathy M.; Saarland University, Department of Experimental and Clinical Toxicology</p> <p>Lauder, Lucas; Universitätsklinikum des Saarlandes und Medizinische Fakultät der Universität des Saarlandes, Klinik für Innere Medizin IIII</p> <p>Ukena, Christian; Universitätsklinikum des Saarlandes und Medizinische Fakultät der Universität des Saarlandes, Department of Internal Medicine III Cardiology, Angiology and Intensive Care Medicine</p> <p>Meyer, Markus; Saarland University, Department of Experimental and Clinical Toxicology</p> <p>Laufs, Ulrich; University Hospital Leipzig, Cardiology</p> <p>Schulz, Martin; Free University of Berlin, Department of Pharmacology; German Institute for Drug Use Evaluation</p> <p>Bohm, Michael; Universitätsklinikum des Saarlandes und Medizinische Fakultät der Universität des Saarlandes, Department of Internal Medicine III Cardiology, Angiology and Intensive Care Medicine</p> <p>Mahfoud, Felix; Universitätsklinikum des Saarlandes und Medizinische Fakultät der Universität des Saarlandes, Department of Internal Medicine III Cardiology, Angiology and Intensive Care Medicine</p> |
| Keywords:                     | Hypertension < CARDIOLOGY, Heart failure < CARDIOLOGY, Cardiology < INTERNAL MEDICINE, PREVENTIVE MEDICINE                                                                                                                                                                                                                                                                                                                                                                                                                                                                                                                                                                                                                                                                                                                                                                                                                                                                                                                                                                                                                                                                                                                                                                                                                                                                                                                                                                                                                                                                                       |
|                               |                                                                                                                                                                                                                                                                                                                                                                                                                                                                                                                                                                                                                                                                                                                                                                                                                                                                                                                                                                                                                                                                                                                                                                                                                                                                                                                                                                                                                                                                                                                                                                                                  |

SCHOLARONE™  
Manuscripts

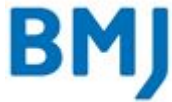

I, the Submitting Author has the right to grant and does grant on behalf of all authors of the Work (as defined in the below author licence), an exclusive licence and/or a non-exclusive licence for contributions from authors who are: i) UK Crown employees; ii) where BMJ has agreed a CC-BY licence shall apply, and/or iii) in accordance with the terms applicable for US Federal Government officers or employees acting as part of their official duties; on a worldwide, perpetual, irrevocable, royalty-free basis to BMJ Publishing Group Ltd ("BMJ") its licensees and where the relevant Journal is co-owned by BMJ to the co-owners of the Journal, to publish the Work in this journal and any other BMJ products and to exploit all rights, as set out in our [licence](#).

The Submitting Author accepts and understands that any supply made under these terms is made by BMJ to the Submitting Author unless you are acting as an employee on behalf of your employer or a postgraduate student of an affiliated institution which is paying any applicable article publishing charge ("APC") for Open Access articles. Where the Submitting Author wishes to make the Work available on an Open Access basis (and intends to pay the relevant APC), the terms of reuse of such Open Access shall be governed by a Creative Commons licence – details of these licences and which [Creative Commons](#) licence will apply to this Work are set out in our licence referred to above.

Other than as permitted in any relevant BMJ Author's Self Archiving Policies, I confirm this Work has not been accepted for publication elsewhere, is not being considered for publication elsewhere and does not duplicate material already published. I confirm all authors consent to publication of this Work and authorise the granting of this licence.

## Sodium content of dietary supplements and over-the-counter medication effervescent tablets

Michael Kunz<sup>1</sup>, Felix Götzinger<sup>1</sup>, Cathy M. Jacobs<sup>2</sup>, Lucas Lauder<sup>1</sup>, Christian Ukena<sup>1</sup>,  
Markus R. Meyer<sup>2</sup>, Ulrich Laufs<sup>3</sup>, Martin Schulz<sup>4,5</sup>, Michael Böhm<sup>1</sup>, Felix Mahfoud<sup>1</sup>

1. Department of Internal Medicine III, Cardiology, Angiology and Intensive Care Medicine, University Hospital Saarland, Saarland University, 66424 Homburg, Germany
2. Department of Experimental and Clinical Toxicology, Institute of Experimental and Clinical Pharmacology and Toxicology, Center for Molecular Signaling (PZMS), Saarland University, 66424 Homburg, Germany
3. Klinik und Poliklinik für Kardiologie, Universitätsklinikum Leipzig, 04103 Leipzig, Germany
4. German Institute for Drug Use Evaluation (DAPI) e.V., 10557 Berlin, Germany
5. Institute of Pharmacy, Freie Universität Berlin, 12169, Berlin, Germany

### Address for correspondence:

Dr. Michael Kunz, M.D.

Department for Internal Medicine III

Cardiology, Angiology, and Intensive Care Medicine

IMED, Geb. 41, Kirrberger Str. 1

Saarland University Hospital and Saarland University

66421 Homburg, Germany

Tel. +4968411615911; Fax +4968411615910

michael.kunz@uks.eu

1  
2  
3 **Question:** Do dietary supplement and over-the-counter effervescent tablets have a high,  
4 clinically relevant sodium content?  
5  
6  
7  
8  
9

10  
11 **Findings:** Dietary supplement and over-the-counter effervescent tablets can contain a high  
12 amount of sodium, which is often unknown or neglected. Some products contain more sodium  
13 than others, although comparable in (active) ingredients.  
14  
15  
16  
17  
18  
19  
20  
21

22 **Meaning:** The variability between preparations is high and these amounts of additional sodium  
23 intake may contribute to poor blood pressure control, cardiovascular events, including  
24 hospitalization for acute heart failure and death. Patients at risk should be advised to abstain  
25 from effervescent tablets.  
26  
27  
28  
29  
30  
31  
32  
33  
34  
35  
36  
37  
38  
39  
40  
41  
42  
43  
44  
45  
46  
47  
48  
49  
50  
51  
52  
53  
54  
55  
56  
57  
58  
59  
60

## **Abstract**

### *Importance*

Dietary sodium intake represents a risk factor for cardiovascular disease and premature death.

### *Objective*

The present study systematically examined the sodium content of dietary supplement effervescent tablets and drugs provided as effervescent tablets from pharmacies.

### *Design*

The sodium content of 39 dietary supplement effervescent tablets available in Germany was measured by optical emission spectrometry with inductively coupled argon plasma. The sodium content of 33 common pharmacy-only effervescent tablets, referred to as “over-the-counter (OTC) drugs”, was obtained from the summary of product characteristics or package inserts. We compared the sodium content of the tablets available in Germany to that of 51 dietary supplement effervescent tablets available in the US.

### *Results*

The dietary supplements available in Germany contained  $283.9 \pm 122.6$  mg sodium/tablet, equivalent to  $14 \pm 6\%$  of the maximum recommended daily sodium intake (MRDSI). Vitamin products had the highest ( $378.3 \pm 112.8$  mg,  $19 \pm 6\%$  of MRDSI) and calcium products the lowest mean sodium content ( $170.4 \pm 113.2$  mg,  $9 \pm 6\%$  of MRDSI). Vitamin products contained significantly more sodium than magnesium ( $p=0.004$ ), calcium ( $p=0.006$ ), and mineral products ( $p=0.048$ ). The sodium content in products available in Germany was higher when compared to those in the US ( $p<0.001$ ). The median sodium content of a single dosage of the OTC drugs was 157.0 mg (interquartile range (IQR): 98.9-417.3 mg); pain/common cold drugs contained the most sodium (median sodium content: 452.1 mg; IQR: 351.3-474.0 mg). Pain/common cold tablets contained significantly more sodium than calcium/vitamin D tablets ( $p<0.0001$ ). The recommended daily dose of the pain/common cold drugs contained 2,776.5 mg sodium (IQR: 1,299.8-3,333.0 mg; 139% of the MRDSI).

1  
2  
3 *Conclusion and Relevance*  
4

5 Nutritional supplements and OTC drugs in effervescent tablets contain a high amount of  
6 sodium. Information on sodium content is frequently missing or neglected. Patients with  
7 sodium-sensitive conditions such as hypertension and heart failure should avoid effervescent  
8 tablets.  
9  
10  
11  
12  
13  
14  
15  
16

17 **Key words:**

18 sodium, dietary supplement, effervescent tablets, over-the-counter drugs, salt, cardiovascular  
19  
20  
21 risk, hypertension, heart failure  
22  
23  
24  
25  
26  
27  
28  
29  
30  
31  
32  
33  
34  
35  
36  
37  
38  
39  
40  
41  
42  
43  
44  
45  
46  
47  
48  
49  
50  
51  
52  
53  
54  
55  
56  
57  
58  
59  
60

## **Introduction**

Dietary sodium intake is associated with elevated blood pressure (BP), increased cardiovascular events including stroke and death from any cause.[1–5] In patients with arterial hypertension, the long-term reduction of 1,800 mg less sodium/day (this corresponds to 4,600 mg table salt/day) was associated with a reduction in systolic/diastolic BP of 5.1/2.7 mmHg.[4] The extent of the sodium restriction was proportional to the reduction in BP, with a more pronounced effect in patients with hypertension.[6] Even modest reductions in dietary sodium have been shown to reduce cardiovascular events, including myocardial infarction and stroke.[1,2,7] Dietary sodium consumption is an important risk factor for premature death and disability-adjusted life-years globally.[8] The World Health Organization (WHO) recommends reducing sodium intake to <2,000 mg/day in adults, which is equivalent to 5,000 mg of table salt (sodium chloride).[9] However, only a small proportion of the population achieves this goal.[10] The daily amount of table salt consumed is often much higher (9,000-12,000 mg/day; 3,500-7,700 mg sodium/day), which may, in part, relate to hidden sodium consumption.[10,11]

Effervescent tablets often contain a relatively high amount of sodium in form of sodium bicarbonate, sodium carbonate, or sodium citrate and are frequently consumed without awareness of their sodium content.[12,13] This may be particularly relevant for dietary supplements and over-the-counter (OTC) effervescent tablets (e.g., vitamin C, magnesium, or analgesics) from groceries, drugstores, discounter, and pharmacies because many manufacturers do not provide information on sodium content on the label. The present study systematically examined the sodium content of dietary supplement effervescent tablets from large groceries- and drugstores and sodium-containing effervescent tablets used as drugs from pharmacies.



## **Methods**

The sodium content of 39 different dietary supplement effervescent tablets available in Germany (divided into the categories vitamins, magnesium, calcium, minerals, and other products) from 11 manufacturers and five distributors was analyzed in May and June 2022. The effervescent tablets were divided into categories based on the main active ingredient (e.g., if a product mainly contains magnesium and only a little calcium related to the recommended daily dose, then it is assigned to the category magnesium). Products with main active ingredients other than those of the above categories have been grouped under “other products”. The products were purchased from two discounters (ALDI SÜD GmbH & Co. and Netto Marken-Discount Stiftung & Co. KG), one grocery store (Edeka Stiftung & Co. KG), and two drugstores (DM drogerie markt GmbH & Co. KG and Müller Handels GmbH & Co. KG) in Germany and then delivered to the laboratory unopened.

The analyses were performed by an accredited chemical laboratory in Germany (CBA GmbH, Kirkel-Limbach, Germany, Deutsche Akkreditierungsstelle D-PL-14360-01-00). After appropriate standardized sample preparation, optical emission spectrometry with inductively coupled argon plasma (ICP-OES) was used for analysis. The sample preparation (pressure digestion in Teflon-pressure-vessels with microwave-assisted heating) proceeded as follows. The effervescent tablets were ground up and a sample amount corresponding to the expected sodium content was weighed out exactly. This amount of powder was displaced firstly with 1 mL water and then with 3 mL 65% nitric acid and transferred to the Teflon-pressure-vessel. The digestion took place at 180° Celsius in the digestion apparatus (microwave digestion system, CEM) for at least 20 minutes, followed by a cooling period. The vessels were filled up with water again to the nominal volume. Reference solutions and blank values were treated in the same way. After sample preparation, the solutions were transferred directly into the ICP-OES equipment (ICP-OES iCAP 6300 Duo, Thermo-Fisher Scientific). All digestion and

1  
2  
3 reference solutions were sprayed into an argon plasma, followed by selective detection of  
4 sodium emission radiation at 589.59 nm. Regarding blank and reference solutions signals and  
5 the resulting linear calibration curve, sodium content in all different effervescent tablets was  
6 determined. Details to measurement accuracy of the method can be found elsewhere.[14]  
7  
8  
9  
10  
11

12  
13 The sodium content of 33 commonly sold pharmacy-only effervescent tablets (30 OTC and three  
14 prescription drugs, all referred to as “OTC drugs” for convenience) from German pharmacies  
15 was derived from the respective package inserts or summary of product characteristics.[15] The  
16 drugs were divided into the categories pain/common cold, cough, calcium/vitamin D, and other  
17 drugs based on the main active ingredient. Drugs with an active ingredient other than those of  
18 the above categories have been grouped under “other products”. The analysis was based on data  
19 from the German Institute for Drug Use Evaluation (Deutsches Arzneiprüfungsinstitut e.V.  
20 (DAPI))[16]. This database contains anonymized dispensing data from more than 95% of the  
21 community pharmacies in all 16 German federal states, claimed at the expense of the statutory  
22 health insurance (SHI) funds, and a DataWare House to identify every product by a specific  
23 code (“Pharmazentralnummer”, PZN). The SHI system, consisting of nearly 100 funds, covers  
24 88% of the population i.e., approximately 73.3 million people. As the unit for prescribed drugs,  
25 we used defined daily doses (DDD) – that is, the assumed average maintenance dose per day  
26 for a drug used for its main indication in adults. Further, we analyzed the aggregate amount of  
27 dispensed packages of drugs and diet supplements as effervescent tablets in community  
28 pharmacies and via mail-order using dispensing data reimbursed by SHI funds as well as private  
29 health insurance companies and over-the-counter sales from the INSIGHT Health[17] and  
30 DatamedIQ[18] databases, respectively. The INSIGHT Health database includes extrapolated  
31 data from a representative sample of over 5,800 community pharmacies.[17] The DatamedIQ  
32 database provides aggregated mail-order sales’ data.[18] Usual package sizes of pain/common  
33 cold and cough effervescent tablets are 10 or 20, of calcium/vitamin D 20, 40, or 100 tablets.  
34  
35  
36  
37  
38  
39  
40  
41  
42  
43  
44  
45  
46  
47  
48  
49  
50  
51  
52  
53  
54  
55  
56  
57  
58  
59  
60

1  
2  
3 The sodium content of the maximum recommended daily dose was also specified and  
4 confirmed by the data in the package insert and/or summary of products characteristics.  
5  
6  
7

8 The sodium content of 51 dietary supplement effervescent tablets available in the United States  
9 (US) was derived from the Dietary Supplement Label Database. The National Institutes of  
10 Health's Dietary Supplement Label Database includes 156,957 current and historical label  
11 information from products marketed in the US.[19] Effervescent tablets with specified sodium  
12 content in the product information were included. The products were divided into the following  
13 categories based on the main active ingredient: vitamin, mineral, energy, and other products.  
14  
15 Products with an active ingredient other than those of the above categories have been grouped  
16 under "other products".  
17  
18  
19  
20  
21  
22  
23  
24  
25  
26  
27

28 The data are presented as means  $\pm$  standard deviation (SD), medians and interquartile ranges  
29 (IQR), or numbers (%). Normal distribution was tested using Kolmogorov-Smirnov/ Shapiro-  
30 Wilk test and using a histogram. Analysis of variance (ANOVA) was used for comparisons of  
31 normally distributed parameters, and for comparisons between non-normally distributed  
32 parameters, the Kruskal-Wallis test was used. If these tests were significant, we used a post hoc  
33 method (Dunn-Bonferroni) for pairwise comparisons. For comparisons between two non-  
34 normally distributed parameters, the Mann-Whitney-U-test was used. A two-sided p-value  
35  $<0.05$  was considered statistically significant. Statistical analyses were performed with SPSS  
36 (version 27.0.1.0).  
37  
38  
39  
40  
41  
42  
43  
44  
45  
46  
47  
48

49 Patients and the public were not involved in any way so a patient and public involvement  
50 statement is not applicable.  
51  
52  
53  
54  
55  
56  
57

## 58 **Results**

### 59 *Dietary supplement effervescent tablets in Germany*

1  
2  
3 Supplemental table 1 provides an overview of the included dietary supplement effervescent  
4 tablets available in Germany. The median weight of one tablet was 5.5 g, and the price ranged  
5 from 2.3 to 39.9 EUR cents/tablet (median price/tablet: 3.2 EUR cents). The sodium content of  
6 the various effervescent tablets is listed in table 1. On average, one effervescent tablet contained  
7 283.9±122.6 mg sodium (table 2 A). Vitamin products had the highest (378.3±112.8 mg) and  
8 calcium products (170.4±113.2 mg) the lowest mean sodium content. Vitamin products  
9 contained significantly more sodium than magnesium (p=0.004), calcium (p=0.006), and  
10 mineral (p=0.048) products (figure 1). Based on the recommendations of the WHO,[9] a single  
11 effervescent tablet contained 4-28% of the maximum recommended daily sodium intake. The  
12 lowest sodium content/effervescent tablet was 76 mg (Magnesium400®, Fit + Vital), and the  
13 highest was 564.7 mg (VitaminC1000®, Fit + Vital). The median sodium content was 5.1 g/100  
14 g effervescent tablets, with the highest being 9.63 g sodium/100 g (Eisen + Vitamin C®, Fit +  
15 Vital). Supplement figure 1 depicts the number of effervescent tablets according to sodium  
16 content (in 100 mg increments) grouped per category. One of ten (10.3%) products contained  
17 more than 500 mg sodium/tablet. Only 5 (12.8%) products declared the sodium content on the  
18 packaging (Mivolis).

#### 41 *Dietary supplement effervescent tablets in the US*

42  
43  
44 The sodium content of the various effervescent tablets is listed in Supplemental table 2. Among  
45 all screened products (n=981), only few declared the sodium content on the label (5.2%),  
46 allowing 51 products to be included. The median sodium content of a single effervescent tablet  
47 was 190.0 mg (IQR: 100-250 mg; table 2 B) and no difference in sodium content between the  
48 various categories was found (p=0.061). A single effervescent tablet contained 2-18% of the  
49 maximum recommended daily sodium content. The sodium content of products available in  
50 Germany was higher when compared with products available in the US (p<0.001).

#### 51 *Pharmacy-only effervescent tablets*

1  
2  
3 The sodium content of the OTC drugs is listed in table 3. The median sodium content of a single  
4 effervescent tablet was 157.0 mg (IQR: 98.9-417.3 mg; table 2 C). The percentage of sodium  
5 consumed per effervescent tablet in relation to the maximum recommended daily sodium intake  
6 ranged from 3-29%. Pain/common cold drugs had the highest median sodium content (452.1  
7 mg; IQR: 351.3-474.0 mg) and calcium/vitamin D drugs the lowest (87.0 mg; IQR: 52.0-103.0  
8 mg). A single pain/common cold effervescent tablet contained significantly more sodium than  
9 one calcium/vitamin D effervescent tablet ( $p<0.0001$ ). Supplement figure 2 depicts the number  
10 of effervescent tablets according to sodium content (in 100 mg increments) grouped per  
11 category. The median sodium content of the recommended daily dose of all included drugs was  
12 384.0 mg (IQR: 139.0-1295.5 mg; table 2 D) and for pain/common cold drugs 2,776.5 mg (IQR:  
13 1,299.8-3,333.0 mg), representing 19%/139% of maximum recommended daily sodium intake,  
14 respectively. The intake of eight tablets (maximum recommended daily dose) of Alka-Seltzer  
15 classic® (aspirin, Bayer) would lead to the ingestion of 3,560 mg sodium (figure 2), which  
16 encompasses 178% of the maximum recommended daily sodium intake. The sodium content  
17 of the maximum daily dose of pain/common cold drugs was significantly higher than the  
18 sodium content of the maximum daily dose of calcium/vitamin D drugs ( $p<0.0001$ ) and cough  
19 drugs ( $p=0.007$ ). No significant difference in sodium content between the dietary supplement  
20 calcium effervescent tablets and the pharmacy-only calcium/vitamin D effervescent tablets was  
21 seen ( $p=0.109$ ). A total of 3.96 million packs of the included pain/common cold drugs and 5.30  
22 million packs of the included cough drugs were sold in German pharmacies and via mail-order  
23 in 2021 (table 3).[17,18] In 2021, a total of 52.32 million defined daily doses of prescribed  
24 calcium/vitamin D drugs, mainly as effervescent tablets, have been dispensed to the expense of  
25 the SHI funds in German community pharmacies.[20]

## 60 **Discussion**

1  
2  
3 This study assessed the sodium content of nutritional supplement effervescent tablets available  
4 in Germany and found the sodium amount to range from 76.0 mg to 564.7 mg (average 283.9  
5 mg) sodium/one tablet representing up to 28% of the maximum recommended daily sodium  
6 intake. Vitamin products contained more sodium than magnesium, calcium, and mineral  
7 products. The sodium amount/tablet of OTC drugs ranged from 52 mg to 575 mg (median 157.0  
8 mg) representing up to 29% of the maximum recommended daily sodium intake. The sodium  
9 content was particularly high for pain/common cold tablets. The intake of the recommended  
10 daily dose of one OTC drug would lead to a median consumption of 384.0 mg sodium, but as  
11 high as 2,776.5 mg for pain/common cold drugs. The major differences in the product classes'  
12 sodium contents are probably due to the variable CO<sub>2</sub>-dependent solubilities. More sodium  
13 bicarbonate and/or sodium citrate is required for poorly soluble active ingredients in  
14 effervescent tablets for them to dissolve quickly and completely in water. The large variations  
15 within individual product classes remain unexplained. Products available in the US also contain  
16 a relevant amount of sodium with contents ranging from 40 to 360 mg. Of note, dietary  
17 supplement effervescent tablets available in Germany contained more sodium than those  
18 available in the US. This may, in part, be related to selection bias since only a few US  
19 manufactures voluntarily provide information about the sodium content.  
20  
21  
22  
23  
24  
25  
26  
27  
28  
29  
30  
31  
32  
33  
34  
35  
36  
37  
38  
39  
40  
41  
42

43 Dietary sodium intake has been linked with serious harmful effects, including BP elevation and  
44 all-cause death.[1–5] The 2017 report of the Global Burden of Disease study listed excess  
45 sodium intake among the major dietary risks, estimated to cause 3 million deaths every year  
46 worldwide.[8] A recently published, randomized trial in 20,995 subjects showed that using a  
47 table salt substitute containing 75% sodium chloride and 25% potassium chloride (as opposed  
48 to regular table salt containing 100% sodium chloride) reduced stroke, cardiovascular events,  
49 and death.[1] Against this background, the WHO recommends that daily sodium intake should  
50 not exceed 2,000 mg.[9] Many national and international societies have advocated for actions  
51 to lower dietary sodium intake through public education, labelling of foods, and improved  
52  
53  
54  
55  
56  
57  
58  
59  
60

1  
2  
3 formulations of convenience food. Nonetheless, the daily sodium intake around the world is  
4 often much higher (9,000-12,000 mg table salt/day; 3,500-7,700 mg sodium/day), which may,  
5  
6 in part, aggravated by hidden sodium consumption.[10,11]  
7  
8  
9

10 For improved and quick solubility, effervescent tablets contain often high amounts of  
11 sodium[12] as sodium bicarbonate, sodium carbonate, and/or sodium citrate. The impact of  
12 sodium-containing effervescent, mainly paracetamol (acetaminophen) tablets on BP, acute  
13 heart failure events, and cardiovascular risk was investigated in several studies.[21–24] The  
14 intake of effervescent paracetamol tablets (with 545 mg sodium/dose) was shown to increase  
15 24-hour systolic BP by 5.0 mmHg.[21] Other trials showed an association between the intake  
16 of sodium-containing effervescent paracetamol tablets (390-440 mg of sodium/tablet) and an  
17 increased risk of hospitalization for heart failure[22], cardiovascular risk, and all-cause  
18 mortality among patients with and without hypertension.[12,23,24] The mechanism by which  
19 the active substance paracetamol increases blood pressure has not been conclusively clarified;  
20 inter alia an influence on the cyclooxygenase pathway is discussed.[25,26] Nevertheless,  
21 sodium containing paracetamol effervescent tablets deteriorate blood pressure control mainly  
22 caused by the sodium in the effervescent tablets, as evident by the fact that after switching from  
23 paracetamol effervescent tablets to paracetamol tablets (without sodium), a decrease in blood  
24 pressure was observed.[27]  
25  
26  
27  
28  
29  
30  
31  
32  
33  
34  
35  
36  
37  
38  
39  
40  
41  
42  
43  
44  
45

46 This provides evidence that effervescent tablets increase sodium intake which might be  
47 associated with an increased risk for cardiovascular diseases.[1–5] A large case-control study  
48 comprising 1,292,337 patients with a mean follow-up of 7.2 years investigated the association  
49 between cardiovascular events and sodium-containing effervescent, dispersible, and soluble  
50 drugs.[24] Participants were prescribed sodium-containing formulations or matched standard  
51 formulations of the same drug. A total of 61,072 patients with a cardiovascular event were  
52 matched with controls. The sodium-containing substances were largely painkillers or calcium  
53  
54  
55  
56  
57  
58  
59  
60



1  
2  
3 drugs with a wide range of sodium content (4.6-427.8 mg/tablet).[24] The adjusted odds ratio  
4  
5 for exposure to sodium-containing drugs were 1.16 for the composite of myocardial infarction,  
6  
7 stroke, or vascular death, 1.28 for all-cause mortality, and 7.18 for hypertension.[24] Of note,  
8  
9 the sodium content of some of the included effervescent tablets in this study is comparably  
10  
11 high.  
12  
13

14  
15 The ancillary sodium intake through effervescent tablets is often neglected or unknown. Herein,  
16  
17 the average sodium content of effervescent food supplements tablets in Germany was 283.9  
18  
19 mg, and the median sodium content of the pharmacy-only effervescent tablets was 157.0 mg.  
20  
21 Consuming one of the included effervescent vitamin tablets or pain/common cold tablets  
22  
23 corresponds to about one fifth (19%/23%) of the maximum recommended daily sodium intake.  
24  
25 Six products (8.3%) contained more than 500 mg sodium/tablet (e.g., VitaminC1000®, Fit +  
26  
27 Vital, with 564.7 mg sodium/tablet). Vitamin products contained significantly more sodium  
28  
29 than magnesium ( $p=0.004$ ), calcium ( $p=0.006$ ) and mineral ( $p=0.048$ ) products; this might be  
30  
31 due to different solubility properties. Of the OTC drugs, doxylamine 25 mg (Gittalun®, Hermes  
32  
33 Arzneimittel) and aspirin 500 mg (Aspirin Migräne®, Bayer) had the highest amount of  
34  
35 sodium/tablet (575 mg and 544 mg). With a maximum recommended daily dose of eight  
36  
37 tablets/day, Alka-Seltzer classic® (324 mg aspirin, Bayer) would add a total of 3,560 mg  
38  
39 sodium. The sodium content of the maximum daily dose of pain/common cold drugs was  
40  
41 significantly higher than the sodium content of the maximum daily dose of calcium/vitamin D  
42  
43 drugs ( $p<0.0001$ ) and cough drugs ( $p=0.007$ ). The majority of the general population and  
44  
45 healthcare professionals alike are unaware of the high sodium content of effervescent  
46  
47 tablets.[12]  
48  
49  
50  
51  
52  
53

54  
55 A relevant proportion of the population regularly consumes effervescent tablets as a dietary  
56  
57 supplement and/or drugs.[13] In a cross-sectional study from France including 1,043 healthy  
58  
59 individuals, 26.9% of the participants reported regular intake of effervescent tablets (once in  
60



1  
2  
3 the last 30 days) and 7.3% reported intake of two or more effervescent tablets/week during the  
4 last 30 days.[13] A vast majority of 93.8% of these effervescent tablets were OTC drugs and  
5 nutritional supplements, such as vitamins.[13] The presence of hypertension, which should  
6 require table salt/sodium restriction, did not result in a reduced intake of effervescent  
7 tablets.[13] The exposure to effervescent tablets was estimated using a questionnaire that  
8 possibly underestimated the actual consumption.[13] The study was performed in  
9 spring/summer, and the intake of effervescent tablets could vary seasonally with an increase  
10 during the season of common colds in fall and winter.

11  
12  
13  
14  
15  
16  
17  
18  
19  
20  
21  
22 According to the Federal Statistical Office of Germany (Statistisches Bundesamt, Destatis), the  
23 production of dietary supplements in 2020, which include effervescent tablets, increased by  
24 11% compared with the previous year, most likely as a consequence of the COVID-19  
25 pandemic.[28] In 2020, 180,200 tons of dietary supplements were produced with a value of 1.1  
26 billion Euros in Germany, which corresponds to an increase of 23.4%.[28] In Germany, the  
27 sodium content must be indicated on the medicinal products sold in pharmacies but is not  
28 mandatory on dietary supplements sold in drugstores or supermarkets.[29,30] Only five (13%)  
29 of the included dietary supplements available in Germany and only 5.2% of the investigated  
30 dietary supplements available in the US declared sodium content on the packaging, hence,  
31 consumers are frequently not informed.

32  
33  
34  
35  
36  
37  
38  
39  
40  
41  
42  
43  
44  
45  
46 Various sodium-containing drugs applied as effervescent tablets are available. In German  
47 pharmacies alone, 3.96 million packages of the included pain/common cold and 5.30 million  
48 packs of the included cough effervescent tablets were sold in 2021.[17,18] A total of 52.32  
49 million DDD of calcium/vitamin D drugs, mainly as effervescent tablets, were claimed by  
50 community pharmacies at the expense of the SHI funds alone in Germany in 2021.[20] Based  
51 on these high sales, we assume that a relevant proportion of the population, occasionally or  
52 regularly, consumes effervescent tablets.

1  
2  
3 A dietary reduction of 1,200 mg sodium/day could translate into an annual reduction of 60,000-  
4 120,000 new coronary heart disease patients, 32,000-66,000 fewer strokes, and 54,000-99,000  
5 fewer myocardial infarctions.[2] This amount of sodium is already contained in approximately  
6 3 of the included effervescent vitamin tablets. A modelling study from China showed that a  
7 reduction of 1,000 mg table salt/day could prevent approximately 9 million cardiovascular  
8 events by 2030, of which approximately 4 million are fatal.[31] Of note, a total of 1,000 mg  
9 table salt contains approximately 394 mg sodium. This amount of sodium approximately  
10 corresponds to the sodium content of one of the examined vitamin or pain/common cold  
11 effervescent tablets.  
12  
13  
14  
15  
16  
17  
18  
19  
20  
21  
22

### 23 24 25 *Limitations*

26  
27 Some limitations of our study should be considered. This study provides relevant insights into  
28 the sodium content in dietary supplemental and pharmacy-only effervescent tablets but does  
29 not assess the association between the ingestion of the drugs and cardiovascular outcomes.  
30 Therefore, only assumptions can be made. Nevertheless, the included effervescent tablets  
31 contained a relevant amount of sodium comparable to prior studies investigating the association  
32 between sodium-containing effervescent tablets and cardiovascular risk. Randomized clinical  
33 trials are needed to investigate the impact of effervescent tablets from grocery stores,  
34 discounters, drug stores, and pharmacies on cardiovascular risk. We provide sales figures for  
35 effervescent tablets sold in pharmacies. The quantity of dietary supplement effervescent tablets  
36 from discounters, grocery- and drugstores is not publicly available.  
37  
38  
39  
40  
41  
42  
43  
44  
45  
46  
47  
48  
49

### 50 51 52 *Conclusion*

53  
54 Dietary supplement and OTC effervescent tablets investigated herein contained a high amount  
55 of sodium, which is often unknown or neglected. Some products contain more sodium than  
56 others, although comparable in (active) ingredients.  
57  
58  
59  
60

### *Perspectives*

As the variability between preparations is high and these amounts of additional sodium intake may contribute to poor BP control, cardiovascular events, including hospitalization for acute heart failure and death, a front-package labelling of sodium content and associated risk should be demanded by regulators before market access. Patients at risk should be advised to abstain from effervescent tablets, and manufacturers are requested to reduce sodium in effervescent formulations.

### **Acknowledgments**

Not applicable.

### **Sources of Funding**

There was no special source of funding related to this work.

### **Disclosures**

Michael Böhm is supported by the Deutsche Forschungsgemeinschaft (German Research Foundation; TTR 219, project number 322900939) and reports personal fees from Abbott, Amgen, Astra Zeneca, Bayer, Boehringer-Ingelheim, Cytokinetic, Edwards, Medtronic, Novartis, ReCor Medical, Servier and Vifor. Felix Mahfoud is supported by Deutsche Gesellschaft für Kardiologie (DGK), Deutsche Forschungsgemeinschaft (SFB TRR219), and Deutsche Herzstiftung and has received scientific support and/or speaker honoraria from Astra Zeneca, Bayer, Boehringer Ingelheim, Medtronic, Merck, and ReCor Medical. Lucas Lauder has received speaker honoraria from ReCor Medical and Medtronic. Christian Ukena has

1  
2  
3 received lecture honoraria or consulting fees from Bayer, Bristol Myers Squibb, Medtronic and  
4  
5 ReCor Medical. Ulrich Laufs has received speaker honoraria from Amgen, Daiichi Sankyo,  
6  
7 Novartis, and Sanofi, all outside the submitted work. Martin Schulz has received speaker  
8  
9 honoraria from BMS, Daiichi Sankyo, DGK-Academy, Pfizer, and Sanofi and consulting fees  
10  
11 from CSL Vifor, MSD and Novartis, all outside the submitted work. Felix Götzinger is  
12  
13 supported by German Foundation for Heart Research (Deutsche Herzstiftung) and has received  
14  
15 speaker honoraria from Astra Zeneca. The other authors do not have conflicts of interest.  
16  
17  
18  
19  
20

### **Authors' Contributions**

21  
22  
23 Concept and design: Kunz, Götzinger, Schulz, Mahfoud.

24  
25 Acquisition, analysis, or interpretation of data: Kunz, Götzinger, Jacobs, Schulz, Mahfoud.

26  
27 Drafting of the manuscript: Kunz, Schulz, Mahfoud.

28  
29 Critical revision of the manuscript for important intellectual content: Jacobs, Lauder, Ukena,  
30  
31 Meyer, Laufs, Schulz, Böhm, Mahfoud.

32  
33 Statistical analysis: Kunz, Lauder.

34  
35 Supervision: Böhm, Mahfoud.

36  
37 The corresponding author attests that all listed authors meet authorship criteria and that no  
38  
39 others meeting the criteria have been omitted.  
40  
41  
42  
43  
44  
45  
46

### **Statement**

47  
48 The Corresponding Author has the right to grant on behalf of all authors and does grant on  
49  
50 behalf of all authors, an exclusive licence (or non exclusive for government employees) on a  
51  
52 worldwide basis to the BMJ Publishing Group Ltd to permit this article (if accepted) to be  
53  
54 published in BMJ editions and any other BMJ PGL products and sublicences such use and  
55  
56 exploit all subsidiary rights, as set out in our licence.  
57  
58  
59  
60

## References

- 1 Neal B, Wu Y, Feng X, *et al*. Effect of Salt Substitution on Cardiovascular Events and Death. *N Engl J Med* 2021;**385**:1067–77. doi:10.1056/NEJMoa2105675
- 2 Bibbins-Domingo K, Chertow GM, Coxson PG, *et al*. Projected Effect of Dietary Salt Reductions on Future Cardiovascular Disease. *N Engl J Med* 2010;**362**:590–9. doi:10.1056/NEJMoa0907355
- 3 Taylor RS, Ashton KE, Moxham T, *et al*. Reduced Dietary Salt for the Prevention of Cardiovascular Disease: A Meta-Analysis of Randomized Controlled Trials (Cochrane Review). *Am J Hypertens* 2011;**24**:843–53. doi:10.1038/ajh.2011.115
- 4 He FJ, Li J, MacGregor GA. Effect of longer-term modest salt reduction on blood pressure. *Cochrane Database Syst Rev* 2013;**2013**. doi:10.1002/14651858.CD004937.pub2
- 5 He FJ, MacGregor GA. Salt reduction lowers cardiovascular risk: meta-analysis of outcome trials. *Lancet* 2011;**378**:380–2. doi:10.1016/S0140-6736(11)61174-4
- 6 Huang L, Trieu K, Yoshimura S, *et al*. Effect of dose and duration of reduction in dietary sodium on blood pressure levels: systematic review and meta-analysis of randomised trials. *BMJ* 2020;**368**:m315. doi:10.1136/bmj.m315
- 7 Göttinger F, Kunz M, Lauder L, *et al*. Arterial hypertension - clinical trials update 2022. *Hypertens Res* 2022;**32**:21–31. doi:10.1038/s41440-022-00931-2
- 8 Afshin A, Sur PJ, Fay KA, *et al*. Health effects of dietary risks in 195 countries, 1990–2017: a systematic analysis for the Global Burden of Disease Study 2017. *Lancet* 2019;**393**:1958–72. doi:10.1016/S0140-6736(19)30041-8
- 9 World Health Organization. Guideline: Sodium intake for adults and children. *World*

1  
2  
3 *Heal Organ* 2012  
4  
5

- 6 10 Brown IJ, Tzoulaki I, Candeias V, *et al.* Salt intakes around the world: implications for  
7 public health. *Int J Epidemiol* 2009;**38**:791–813. doi:10.1093/ije/dyp139  
8  
9  
10  
11 11 He FJ, Burnier M, MacGregor GA. Nutrition in cardiovascular disease: salt in  
12 hypertension and heart failure. *Eur Heart J* 2011;**32**:3073–80.  
13 doi:10.1093/eurheartj/ehr194  
14  
15  
16  
17 12 Schutte AE, Neal B. The sodium hidden in medication: a tough pill to swallow. *Eur*  
18 *Heart J* 2022;**43**:1756–8. doi:10.1093/eurheartj/ehab888  
19  
20  
21  
22  
23 13 Perrin G, Berdot S, Thomas F, *et al.* Evaluation of exposure to effervescent drugs in a  
24 large health check-up population in France: a cross-sectional study. *BMJ Open*  
25 2018;**8**:e022368. doi:10.1136/bmjopen-2018-022368  
26  
27  
28  
29  
30  
31 14 Lebensmittelanalytik TKC 275. Amtliche Sammlung von Untersuchungsverfahren nach  
32 §64 LfGB- Untersuchung von Lebensmitteln EN 16943:2017.  
33  
34  
35  
36 15 Fachinformation. <https://www.fachinfo.de>  
37  
38  
39 16 Deutsches Arzneiprüfungsinstitut e.V. <https://www.dapi.de>  
40  
41  
42  
43 17 INSIGHT Health GmbH & Co. KG. <https://www.insight-health.de/>  
44  
45  
46  
47 18 DatamedIQ GmbH. <https://www.datamediq.com/>  
48  
49  
50 19 National Institutes of Health. Dietary Supplement Label Database.  
51 [https://ods.od.nih.gov/Research/Dietary\\_Supplement\\_Label\\_Database.aspx](https://ods.od.nih.gov/Research/Dietary_Supplement_Label_Database.aspx)  
52  
53  
54  
55 20 Ludwig W-D, Mühlbauer B, Seifert R. *Arzneiverordnungs-Report 2021*. Springer 2021.  
56  
57  
58  
59 21 Benitez-Camps M, Morros Padrós R, Pera-Pujadas H, *et al.* Effect of effervescent  
60 paracetamol on blood pressure. *J Hypertens* 2018;**36**:1656–62.

- 1  
2  
3 doi:10.1097/HJH.0000000000001733  
4  
5  
6 22 Perrin G, Arnoux A, Berdot S, *et al.* Association Between Exposure to Effervescent  
7 Paracetamol and Hospitalization for Acute Heart Failure: A Case-Crossover Study. *J*  
8 *Clin Pharmacol* Published Online First: 19 February 2022. doi:10.1002/jcph.2027  
9  
10  
11  
12  
13  
14 23 Zeng C, Rosenberg L, Li X, *et al.* Sodium-containing acetaminophen and cardiovascular  
15 outcomes in individuals with and without hypertension. *Eur Heart J* 2022;**43**:1743–55.  
16 doi:10.1093/eurheartj/ehac059  
17  
18  
19  
20  
21  
22 24 George J, Majeed W, Mackenzie IS, *et al.* Association between cardiovascular events  
23 and sodium-containing effervescent, dispersible, and soluble drugs: nested case-control  
24 study. *BMJ* 2013;**347**:f6954–f6954. doi:10.1136/bmj.f6954  
25  
26  
27  
28  
29  
30 25 Turtle EJ, Dear JW, Webb DJ. A systematic review of the effect of paracetamol on blood  
31 pressure in hypertensive and non-hypertensive subjects. *Br J Clin Pharmacol*  
32 2013;**75**:1396–405. doi:10.1111/bcp.12032  
33  
34  
35  
36  
37 26 MacIntyre IM, Turtle EJ, Farrah TE, *et al.* Regular Acetaminophen Use and Blood  
38 Pressure in People With Hypertension: The PATH-BP Trial. *Circulation* 2022;**145**:416–  
39 23. doi:10.1161/CIRCULATIONAHA.121.056015  
40  
41  
42  
43  
44  
45 27 Ubeda A, Llopico J, Sanchez MT. Blood pressure reduction in hypertensive patients after  
46 withdrawal of effervescent medication. *Pharmacoepidemiol Drug Saf* 2009;**18**:417–9.  
47 doi:10.1002/pds.1701  
48  
49  
50  
51  
52  
53 28 Statistische Bundesamt (Destatis). Nahrungsergänzungsmittel boomen: Produktion im  
54 Jahr 2020 um 11,0 % höher als im Vorjahr.  
55 2021. [https://www.destatis.de/DE/Presse/Pressemitteilungen/Zahl-der-](https://www.destatis.de/DE/Presse/Pressemitteilungen/Zahl-der-Woche/2021/PD21_23_p002.html)  
56  
57  
58  
59  
60

- 1  
2  
3 29 Bundesministerium der Justiz, Bundesamt für Justiz. Verordnung über  
4 Nahrungsergänzungsmittel (Nahrungsergänzungsmittelverordnung - NemV).  
5  
6 2017;:2011–3.  
7  
8  
9  
10  
11 30 Europäisches Parlament. RICHTLINIE 2002/46/EG DES EUROPÄISCHEN  
12 PARLAMENTS UND DES RATES vom 10. Juni 2002 zur Angleichung der  
13 Rechtsvorschriften der Mitgliedstaaten über Nahrungsergänzungsmittel. 2017;21:1–37.  
14  
15  
16  
17  
18 31 Tan M, He F, Morris JK, *et al.* Reducing daily salt intake in China by 1 g could prevent  
19 almost 9 million cardiovascular events by 2030: a modelling study. *BMJ Nutr Prev Heal*  
20 2022;:e000408. doi:10.1136/bmjnph-2021-000408  
21  
22  
23  
24  
25  
26  
27  
28  
29  
30  
31  
32  
33  
34  
35  
36  
37  
38  
39  
40  
41  
42  
43  
44  
45  
46  
47  
48  
49  
50  
51  
52  
53  
54  
55  
56  
57  
58  
59  
60



**Tables****Table 1. Sodium content of German dietary supplement effervescent tablets**

| Category                        | Brand name®                                         | Sodium content/tablet (mg) | % of maximum recommended daily sodium intake* | Sodium (g)/100g product | Weight/tablet (g) |
|---------------------------------|-----------------------------------------------------|----------------------------|-----------------------------------------------|-------------------------|-------------------|
| Vitamins                        | fit+Vital Vitamin C1000                             | 564.70                     | 28                                            | 9.01                    | 6.27              |
|                                 | elkos Vivede Vitamin C +Zink, Selen, und Vitamin D3 | 541.10                     | 27                                            | 8.95                    | 6.05              |
|                                 | Doppelherz aktiv Vitamin C +Zink                    | 512.80                     | 26                                            | 8.11                    | 6.32              |
|                                 | ProLife Vitamin C +Zink, Selen, Vitamin D3          | 507.90                     | 25                                            | 8.48                    | 5.99              |
|                                 | Doppelherz aktiv Vitamin D3 2000 I.E.               | 485.10                     | 24                                            | 7.44                    | 6.52              |
|                                 | SilaVit Vitamin B12                                 | 367.30                     | 18                                            | 9.05                    | 4.06              |
|                                 | Vitalis Vitamin C 120 mg                            | 341.50                     | 17                                            | 8.54                    | 4.00              |
|                                 | Mivolis Vitamin B12                                 | 333.00                     | 17                                            | 8.08                    | 4.12              |
|                                 | Mivolis Vitamin C                                   | 330.30                     | 17                                            | 8.02                    | 4.12              |
|                                 | Doppelherz aktiv A-Z Multivitamin+ Mineralien       | 321.40                     | 16                                            | 5.10                    | 6.30              |
|                                 | SilaVit Vitamin C                                   | 318.00                     | 16                                            | 7.92                    | 4.02              |
|                                 | fit+Vital Multivitamin                              | 304.60                     | 15                                            | 7.57                    | 4.02              |
|                                 | elkos Vivede Multivitamin+ Mineralstoffe            | 273.50                     | 14                                            | 4.56                    | 6.00              |
|                                 | ProLife Multivitamin+ Mineralstoffe                 | 263.20                     | 13                                            | 4.38                    | 6.01              |
| fit+Vital Multivitamin+ Mineral | 210.70                                              | 11                         | 5.26                                          | 4.01                    |                   |
| Magnesium                       | Doppelherz aktiv Magnesium 400                      | 332.50                     | 17                                            | 5.11                    | 6.51              |
|                                 | Vitalis Magnesium 240 mg                            | 306.10                     | 15                                            | 5.58                    | 5.49              |
|                                 | Abtei Magnesium 400 Plus Vitamin C+E                | 298.70                     | 15                                            | 5.56                    | 5.38              |
|                                 | Doppelherz aktiv Magnesium+ Calcium+ D3             | 271.20                     | 14                                            | 4.12                    | 6.59              |
|                                 | Doppelherz aktiv Magnesium 500+ B12                 | 268.90                     | 13                                            | 4.12                    | 6.53              |

|                                                                                                    |                                                    |        |    |      |       |
|----------------------------------------------------------------------------------------------------|----------------------------------------------------|--------|----|------|-------|
|                                                                                                    | Mivolis Magnesium                                  | 262.70 | 13 | 6.39 | 4.11  |
|                                                                                                    | elkos Vivede Magnesium+ B-Komplex, Vitamin C und E | 248.40 | 12 | 4.13 | 6.01  |
|                                                                                                    | Doppelherz aktiv Magnesium+ Kalium Sport           | 245.50 | 12 | 3.72 | 6.60  |
|                                                                                                    | ProLife Magnesium+ B-Komplex, Vitamin C&E          | 238.00 | 12 | 3.95 | 6.03  |
|                                                                                                    | Kneipp Magnesium+ Calcium+ D3                      | 221.30 | 11 | 4.91 | 4.51  |
|                                                                                                    | Abtei Magnesium+ Kalium Aktiv Plus                 | 138.10 | 7  | 2.52 | 5.48  |
|                                                                                                    | fit+Vital Magnesium                                | 117.80 | 6  | 2.95 | 3.99  |
|                                                                                                    | fit+Vital Magnesium 400                            | 76.00  | 4  | 1.40 | 5.41  |
| Calcium                                                                                            | ProLife Calcium+ Vitamin K1, D3, Folsäure          | 335.90 | 17 | 5.60 | 6.00  |
|                                                                                                    | Mivolis Calcium                                    | 145.90 | 7  | 3.53 | 4.14  |
|                                                                                                    | fit+Vital Calcium+ D3                              | 116.20 | 6  | 2.89 | 4.02  |
|                                                                                                    | fit+Vital Calcium 1000                             | 83.70  | 4  | 1.36 | 6.17  |
| Minerals                                                                                           | Kneipp Männer Mineralstoffe                        | 217.00 | 11 | 3.87 | 5.61  |
|                                                                                                    | Kneipp Frauen Mineralstoffe                        | 209.40 | 10 | 3.33 | 6.29  |
|                                                                                                    | Mivolis Multi-Mineral                              | 148.40 | 7  | 3.62 | 4.10  |
| Other products                                                                                     | fit+Vital Eisen+ Vitamin C                         | 382.90 | 19 | 9.63 | 3.98  |
|                                                                                                    | SilaVit Immun Aktiv                                | 363.80 | 18 | 8.55 | 4.25  |
|                                                                                                    | sanotact Recovery+ Aminosäuren                     | 187.60 | 9  | 3.54 | 5.29  |
|                                                                                                    | isostar Hydrate & Perform                          | 181.00 | 9  | 1.51 | 11.99 |
| *Maximum recommended daily sodium intake according to World Health Organization recommendations[9] |                                                    |        |    |      |       |

**Table 2. Sodium content per: (A) Dietary supplement effervescent tablet available in Germany, (B) Dietary supplement effervescent tablet in the US, (C) OTC effervescent tablet, (D) recommended daily dose of the included OTC effervescent tablets**

| <b>A</b>                 |                                                                   |                                                                       |
|--------------------------|-------------------------------------------------------------------|-----------------------------------------------------------------------|
| <b>Category</b>          | <b>Sodium content (mg)/tablet mean±SD</b>                         | <b>% of the maximum recommended daily sodium intake* mean±SD</b>      |
| ...all included products | 283.9±122.6                                                       | 14±6                                                                  |
| ...vitamin products      | 378.3±112.8                                                       | 19±6                                                                  |
| ...magnesium products    | 232.7±76.7                                                        | 12±4                                                                  |
| ...calcium products      | 170.4±113.2                                                       | 9±6                                                                   |
| ...mineral products      | 191.6±37.6                                                        | 10±2                                                                  |
| ...other products        | 278.8±109.5                                                       | 14±6                                                                  |
| <b>B</b>                 |                                                                   |                                                                       |
| <b>Category</b>          | <b>Sodium content (mg)/tablet Median (IQR)</b>                    | <b>% of the maximum recommended daily sodium intake* Median (IQR)</b> |
| ...all included products | 190.0 (100.0-250.0)                                               | 10 (5-13)                                                             |
| ...vitamin products      | 100.0 (72.5-230.0)                                                | 5 (4-12)                                                              |
| ...mineral products      | 250.0 (140.0-360.0)                                               | 13 (7-18)                                                             |
| ...energy products       | 190.0 (150.0-260.0)                                               | 10 (8-13)                                                             |
| ...other products        | 210.0 (158.8-256.3)                                               | 11 (8-13)                                                             |
| <b>C</b>                 |                                                                   |                                                                       |
| <b>Category</b>          | <b>Sodium content (mg)/tablet Median (IQR)</b>                    | <b>% of the maximum recommended daily sodium intake* Median (IQR)</b> |
| ...all included drugs    | 157.0 (98.9-417.3)                                                | 8 (5-21)                                                              |
| ...pain/common cold      | 452.1 (351.3-474.0)                                               | 23 (18-24)                                                            |
| ...cough                 | 138.8 (112.8-157.9)                                               | 7 (6-8)                                                               |
| ...calcium/vitamin D     | 87.0 (52.0-103.0)                                                 | 4 (3-5)                                                               |
| ...other drugs           | 267.0 (119.8-387.5)                                               | 13 (6-19)                                                             |
| <b>D</b>                 |                                                                   |                                                                       |
| <b>Category</b>          | <b>Sodium content (mg) of the maximum daily dose Median (IQR)</b> | <b>% of the maximum recommended daily sodium intake* Median (IQR)</b> |
| ...all included drugs    | 384.0 (139.0-1295.5)                                              | 19 (7-65)                                                             |
| ...pain/common cold      | 2,776.5 (1,299.8-3,333.0)                                         | 139 (65-167)                                                          |
| ...cough                 | 297.0 (144.5-427.0)                                               | 15 (7-21)                                                             |
| ...calcium/vitamin D     | 104.0 (96.3-104.8)                                                | 5 (5-5)                                                               |
| ...other drugs           | 801.0 (312.8-1,155.5)                                             | 40 (16-58)                                                            |

1  
2  
3 \*Maximum recommended daily sodium intake according to World Health Organization  
4 recommendations[9]  
5 IQR= interquartile range; OTC= over-the-counter, SD= standard deviation  
6  
7  
8  
9  
10  
11  
12  
13  
14  
15  
16  
17  
18  
19  
20  
21  
22  
23  
24  
25  
26  
27  
28  
29  
30  
31  
32  
33  
34  
35  
36  
37  
38  
39  
40  
41  
42  
43  
44  
45  
46  
47  
48  
49  
50  
51  
52  
53  
54  
55  
56  
57  
58  
59  
60

For peer review only

**Table 3. Sodium content of OTC effervescent tablets**

| Category                                         | Brand name® (manufacturer)                           | sodium content/tablet (mg) | % of the maximum recommended daily sodium intake* of one tablet | sodium content of maximum recommended daily dose (mg) | % of maximum recommended daily sodium intake* of the maximum recommended daily dose | Maximum recommended tablets per day | OTC | Active ingredients                                       | Sales figures                                                   |
|--------------------------------------------------|------------------------------------------------------|----------------------------|-----------------------------------------------------------------|-------------------------------------------------------|-------------------------------------------------------------------------------------|-------------------------------------|-----|----------------------------------------------------------|-----------------------------------------------------------------|
| Pain/common cold (frequently dispensed products) | Aspirin Migräne (Bayer)                              | 544                        | 27                                                              | 3,264                                                 | 163                                                                                 | 6                                   | yes | aspirin                                                  | 3.96 million packs of this class sold in 2021 in Germany[17,18] |
|                                                  | ASS + C-ratiopharm gegen Schmerzen (Ratiopharm)      | 477                        | 24                                                              | 2,385                                                 | 119                                                                                 | 5                                   | yes | aspirin, ascorbic acid                                   |                                                                 |
|                                                  | ASPIRIN plus C forte (Bayer)                         | 473                        | 24                                                              | 1,419                                                 | 71                                                                                  | 3                                   | yes | aspirin, ascorbic acid                                   |                                                                 |
|                                                  | ASPIRIN plus C (Bayer)                               | 466                        | 23                                                              | 2,796                                                 | 140                                                                                 | 6                                   | yes | Aspirin, ascorbic acid                                   |                                                                 |
|                                                  | Togal Kopfschmerz-Brause + Vitamin C (Kyberg Pharma) | 459                        | 23                                                              | 2,754                                                 | 138                                                                                 | 6                                   | yes | Aspirin, ascorbic acid, caffeine                         |                                                                 |
|                                                  | Alka-Seltzer classic (Bayer)                         | 445                        | 22                                                              | 3,560                                                 | 178                                                                                 | 8                                   | yes | aspirin                                                  |                                                                 |
|                                                  | FIZAMOL 500 mg (Accord Healthcare)                   | 419                        | 21                                                              | 3,352                                                 | 168                                                                                 | 8                                   | yes | acetaminophen                                            |                                                                 |
|                                                  | PARACETAMOL-ratiopharm 500 mg (Ratiopharm)           | 416                        | 21                                                              | 3,328                                                 | 166                                                                                 | 8                                   | yes | acetaminophen                                            |                                                                 |
|                                                  | WICK DayMed Erkältungsgetränk (WICK Pharma)          | 157                        | 8                                                               | 942                                                   | 47                                                                                  | 6                                   | yes | acetaminophen, guaifenesin, phenylephrine                |                                                                 |
|                                                  | Grippostad C Stickpack (STADA Consumer Health)       | 128                        | 6                                                               | 384                                                   | 19                                                                                  | 3                                   | yes | acetaminophen, chlorpheniramine, ascorbic acid, caffeine |                                                                 |
| Cough (frequently dispensed products)            | NAC-ratiopharm 200 mg, (Ratiopharm)                  | 190                        | 10                                                              | 570                                                   | 29                                                                                  | 3                                   | yes | acetylcysteine                                           | 5.30 million packs of this class sold in 2021 in Germany[17,18] |
|                                                  | Fluimucil 200 mg (Zambon)                            | 158                        | 8                                                               | 474                                                   | 24                                                                                  | 3                                   | no  | acetylcysteine                                           |                                                                 |
|                                                  | Fluimucil long 600 mg (Zambon)                       | 158                        | 8                                                               | 158                                                   | 8                                                                                   | 1                                   | no  | acetylcysteine                                           |                                                                 |
|                                                  | NAC-ratiopharm 600 mg (Ratiopharm)                   | 150                        | 8                                                               | 150                                                   | 8                                                                                   | 1                                   | yes | acetylcysteine                                           |                                                                 |
|                                                  | ACC akut 600mg (Hexal)                               | 139                        | 7                                                               | 139                                                   | 7                                                                                   | 1                                   | yes | acetylcysteine                                           |                                                                 |
|                                                  | NAC 600 akut (IA Pharma)                             | 139                        | 7                                                               | 139                                                   | 7                                                                                   | 1                                   | yes | acetylcysteine                                           |                                                                 |
|                                                  | Ambrobeta 30 (betapharm Arzneimittel)                | 127                        | 6                                                               | 381                                                   | 19                                                                                  | 3                                   | yes | ambroxol                                                 |                                                                 |
|                                                  | ACC akut 200mg (Hexal)                               | 99                         | 5                                                               | 297                                                   | 15                                                                                  | 3                                   | yes | acetylcysteine                                           |                                                                 |
|                                                  | NAC 200 akut (IA Pharma)                             | 99                         | 5                                                               | 297                                                   | 15                                                                                  | 3                                   | yes | acetylcysteine                                           |                                                                 |

|                                                                                                                                                                                        |                                                         |     |    |       |    |    |     |                     |                                                                                                                           |
|----------------------------------------------------------------------------------------------------------------------------------------------------------------------------------------|---------------------------------------------------------|-----|----|-------|----|----|-----|---------------------|---------------------------------------------------------------------------------------------------------------------------|
| Calcium/<br>vitamin D3<br>(coleciferol;<br>examples of<br>frequently<br>prescribed<br>effervescent<br>tablets)                                                                         | Calcium Sandoz forte (Hexal)                            | 288 | 14 | 864   | 43 | 3  | yes | Calcium + vitamin D | 52.32 million<br>DDD of the<br>entire class<br>claimed to the<br>expense of the<br>SHI funds in<br>2021 in<br>Germany[20] |
|                                                                                                                                                                                        | Calcium D3 acis 1.200/ 800 (acis<br>Arzneimittel)       | 105 | 5  | 105   | 5  | 1  | yes | Calcium + vitamin D |                                                                                                                           |
|                                                                                                                                                                                        | CalciCare-D3 forte 1.000 mg/<br>880 I.E. (ORION Pharma) | 97  | 5  | 97    | 5  | 1  | yes | Calcium + vitamin D |                                                                                                                           |
|                                                                                                                                                                                        | Calcilac 1000 mg/ 880 I.E.<br>(MIBE Arzneimittel)       | 96  | 5  | 96    | 5  | 1  | yes | Calcium + vitamin D |                                                                                                                           |
|                                                                                                                                                                                        | Osteoplus 1.000 mg/ 1.000 I.E.<br>(Recordati Pharma)    | 78  | 4  | 78    | 4  | 1  | yes | Calcium + vitamin D |                                                                                                                           |
|                                                                                                                                                                                        | Calcigen D 600/ 400 (MEDA<br>Pharma)                    | 52  | 3  | 104   | 5  | 2  | yes | Calcium + vitamin D |                                                                                                                           |
|                                                                                                                                                                                        | Calcium D3-ratiopharm 600/ 400<br>(Ratiopharm)          | 52  | 3  | 104   | 5  | 2  | yes | Calcium + vitamin D |                                                                                                                           |
|                                                                                                                                                                                        | Calcium Sandoz D Osteo 600<br>mg/ 400 I.E. (Hexal)      | 52  | 3  | 104   | 5  | 2  | yes | Calcium + vitamin D |                                                                                                                           |
| Other drugs<br>(examples)                                                                                                                                                              | Gittalun (Hermes Arzneimittel)                          | 575 | 29 | 1,150 | 58 | 2  | yes | doxylamine          | -                                                                                                                         |
|                                                                                                                                                                                        | Zink-ratiopharm 25mg<br>(Ratiopharm)                    | 325 | 16 | 325   | 16 | 1  | yes | zinc                |                                                                                                                           |
|                                                                                                                                                                                        | Magnesium Verla (Verla-Pharm<br>Arzneimittel)           | 314 | 16 | 942   | 47 | 3  | yes | magnesium           |                                                                                                                           |
|                                                                                                                                                                                        | Lösferron (MIBE Arzneimittel)                           | 220 | 11 | 660   | 33 | 3  | yes | Fe-(II)-D-gluconat  |                                                                                                                           |
|                                                                                                                                                                                        | Magnesiocard 7,5 mmol (Verla-<br>Pharm Arzneimittel)    | 138 | 7  | 276   | 14 | 2  | yes | magnesium           |                                                                                                                           |
|                                                                                                                                                                                        | Morphin Painbreak akut 20 mg<br>(PB Pharma)             | 65  | 3  | 1,170 | 59 | 18 | no  | morphine            |                                                                                                                           |
| *Maximum recommended daily sodium intake according to World Health Organization recommendations[9]<br>DDD= defined daily doses; OTC= over-the-counter; SHI= statutory health insurance |                                                         |     |    |       |    |    |     |                     |                                                                                                                           |

1  
2  
3 **Figure Legends**  
4

5  
6 Central Illustration.  
7

8  
9 Figure 1. Mean sodium content of the respective category of the dietary supplement  
10 effervescent tablets available in Germany.  
11  
12

13  
14 Figure 2. Sodium content of the maximum recommended daily dose of some included  
15 effervescent OTC tablets.  
16  
17

18  
19  
20  
21  
22  
23  
24  
25  
26  
27  
28  
29  
30  
31  
32  
33  
34  
35  
36  
37  
38  
39  
40  
41  
42  
43  
44  
45  
46  
47  
48  
49  
50  
51  
52  
53  
54  
55  
56  
57  
58  
59  
60

For peer review only

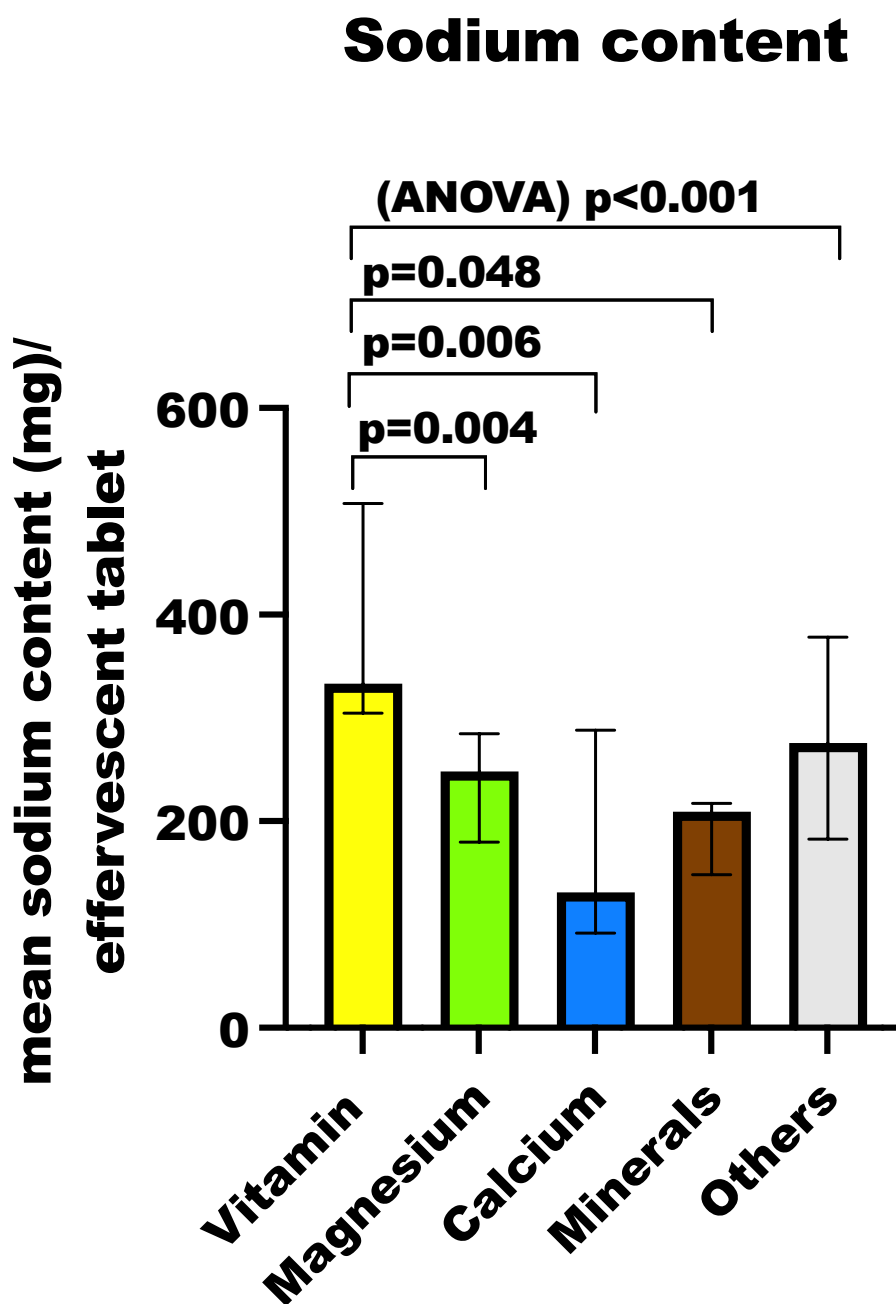

Figure 1. Mean sodium content of the respective category of the German dietary supplement effervescent tablets. P values are given for between-group comparisons (adjusted for post hoc method). ANOVA = analysis of variance.



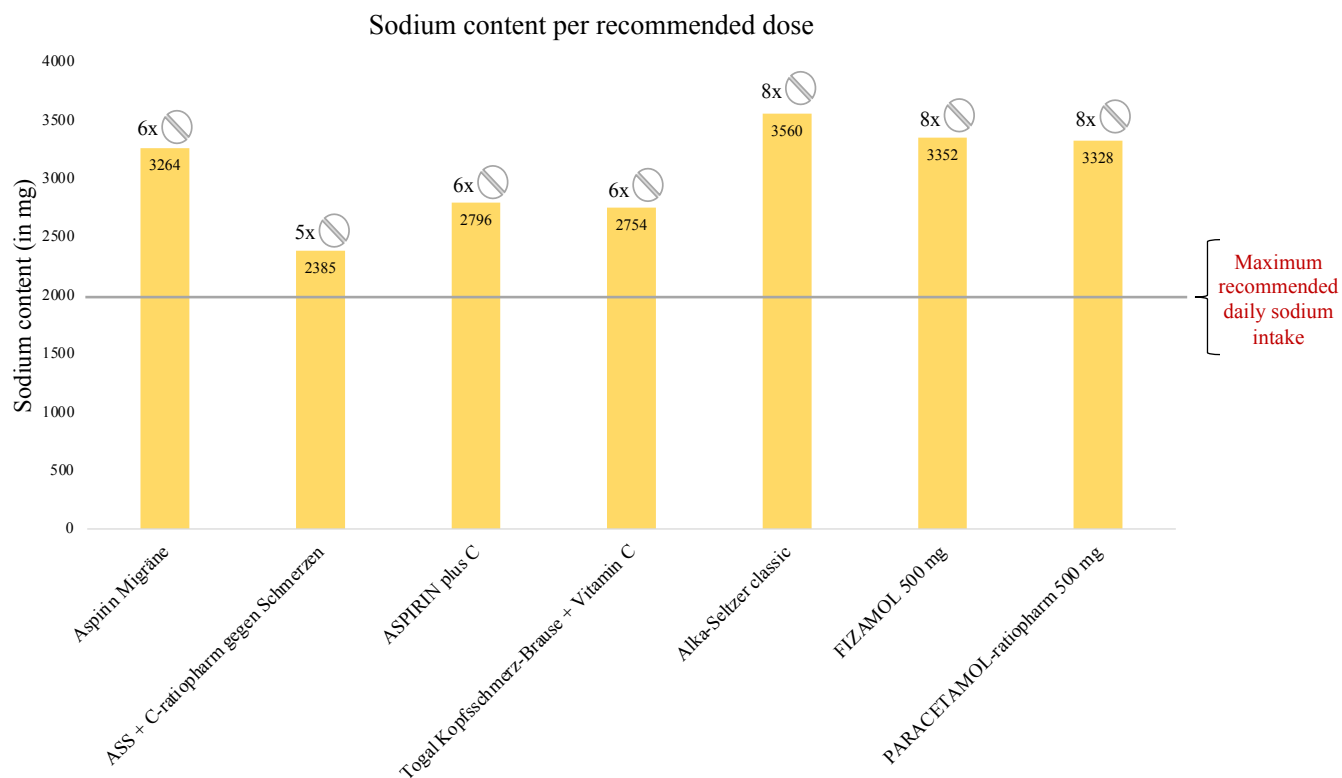

Figure 2. Sodium content of the maximum recommended daily dose of some included effervescent OTC tablets. The number above the bars corresponds to the maximum daily number of tablets. (Aspirin Migräne®: Bayer; ASS + C-ratiopharm gegen Schmerzen®: Ratiopharm; ASPIRIN plus C®: Bayer; Total Kopfschmerz-Brause + Vitamin C®: Kyberg Pharma; Alka-Seltzer classic®: Bayer; FIZAMOL 500 mg®: Accord Healthcare, Paracetamol-ratiopharm 500mg®: Ratiopharm)

**What is known ?**

- Dietary sodium intake → BP ↑ and CV events ↑
- Recommended daily sodium intake: < 2000 mg
- ETs contain high amounts of sodium (often not labeled)
- approx. 30% of the population regularly consume ETs as dietary supplements and/or drugs

**Dietary supplement ETs**

- 39 included
- Average sodium content: 283.9±122.6 mg → 4-28% of the RDSI
- Highest average sodium content: vitamin products (378.3±112.8 mg)
- Lowest average sodium content: calcium products (170.4±113.2 mg)
- Vitamin products: more sodium than magnesium (p=0.004), calcium (p=0.006) and mineral (p=0.048) products

**Pharmacy-only ETs**

- Median sodium content: 157.0 mg (IQR: 98.9-417.3 mg) → 3-29% of the RDSI
- Highest median sodium content: pain/ common cold drugs (452.1 mg; IQR: 351.3-474.0 mg)
- Lowest median sodium content: calcium/ vitamin D drugs (87.0 mg; IQR: 52.0-103.0 mg)
- Median sodium content of the MDD of pain/ common cold drugs: 2,776.5 mg (IQR: 1,299.8-3,333.0 mg)

**Conclusion**

- ETs contain a relevant amount of sodium (often unknown or neglected)
- Additional sodium intake → poor BP control and CV events ↑
- Sodium loaded ETs should be avoided in patients at risk

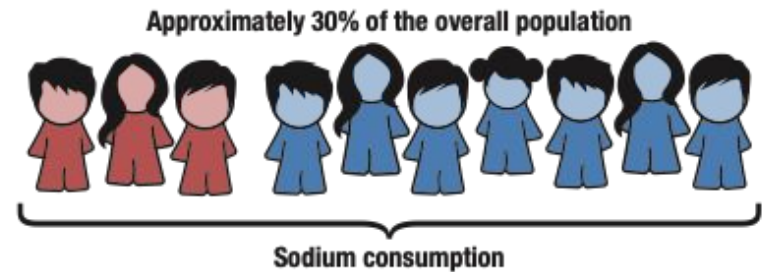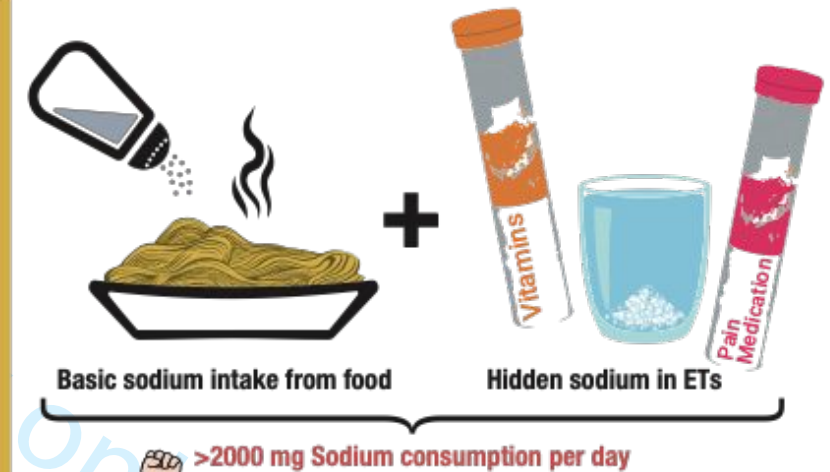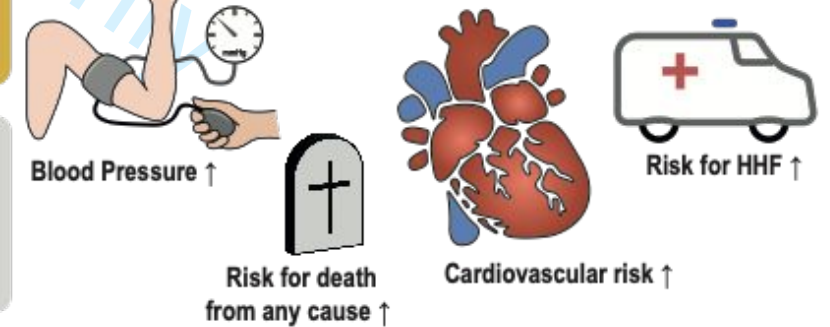

1  
2  
3  
4  
5  
6  
7  
8  
9  
10  
11  
12  
13  
14  
15  
16  
17  
18  
19  
20  
21  
22  
23  
24  
25  
26  
27  
28  
29  
30  
31  
32  
33  
34  
35  
36  
37  
38  
39  
40  
41  
42  
43  
44  
45  
46

Central Illustration. BP= blood pressure; CV= cardiovascular; ET= effervescent tablets; HHF= hospitalization for acute heart failure; IQR= interquartile range; MDD= maximum daily dose; RDSI= recommended daily sodium intake.

For peer review only

1  
2  
3 **Supplement:**  
4

5 Supplement table 1. Overview of the included German products.  
6

7 Supplement table 2. Sodium content of the included American products.  
8  
9

10 Supplement figure 1. Number of different German dietary supplement effervescent tablets that  
11  
12 contain a certain amount of sodium (classified in 100 mg increments).  
13  
14

15  
16 Supplement figure 2. Number of different pharmacy-only effervescent tablets that contain a  
17  
18 certain amount of sodium (classified in 100 mg increments).  
19  
20  
21  
22  
23  
24  
25  
26  
27  
28  
29  
30  
31  
32  
33  
34  
35  
36  
37  
38  
39  
40  
41  
42  
43  
44  
45  
46  
47  
48  
49  
50  
51  
52  
53  
54  
55  
56  
57  
58  
59  
60

Supplement table 1. Overview of the included German products.

| Offeror                                 | Manufacturer | Brand name®                           | Number of tablets | Total weight (g) | Weight/tablet (g) | Total price (cent) | Price/tablet (cent) |
|-----------------------------------------|--------------|---------------------------------------|-------------------|------------------|-------------------|--------------------|---------------------|
| ALDI SÜD GmbH & Co.                     | Vitalis      | Magnesium 240 mg                      | 14                | 78               | 5.6               | 45                 | 3.2                 |
|                                         |              | VitaminC 120 mg                       | 20                | 80               | 4.0               | 45                 | 2.3                 |
| Edeka Stiftung & Co. KG                 | ELKOS Vivede | VitaminC+ Zink, Selen, Vitamin D3     | 17                | 102              | 6.0               | 55                 | 3.2                 |
|                                         |              | Magnesium+ B-Komplex, Vitamin C und E | 17                | 102              | 6.0               | 55                 | 3.2                 |
|                                         |              | Multivitamin+ Mineralstoffe           | 17                | 102              | 6.0               | 55                 | 3.2                 |
| Netto Marken-Discount Stiftung & Co. KG | ProLife      | VitaminC+ Zink, Selen, Vitamin D3     | 17                | 102              | 6.0               | 55                 | 3.2                 |
|                                         |              | Magnesium+ B-Komplex, Vitamin C&E     | 17                | 102              | 6.0               | 55                 | 3.2                 |
|                                         |              | Multivitamin+ Mineralstoffe           | 17                | 102              | 6.0               | 55                 | 3.2                 |
|                                         |              | Calcium+ Vitamin K1, D3, Folsäure     | 17                | 102              | 6.0               | 55                 | 3.2                 |
| DM drogerie markt GmbH & Co. KG         | Mivolis      | Magnesium                             | 20                | 82               | 4.1               | 45                 | 2.3                 |
|                                         |              | VitaminB12                            | 20                | 82               | 4.1               | 45                 | 2.3                 |
|                                         |              | Calcium                               | 20                | 82               | 4.1               | 45                 | 2.3                 |
|                                         |              | Multi-Mineral                         | 20                | 82               | 4.1               | 45                 | 2.3                 |
|                                         |              | VitaminC                              | 20                | 82               | 4.1               | 45                 | 2.3                 |
|                                         | Kneipp       | Magnesium+ Calcium+ D3                | 20                | 90               | 4.5               | 245                | 12.3                |
| Müller Handels GmbH & Co. KG            | Kneipp       | Frauen Mineralstoffe                  | 15                | 94               | 6.3               | 345                | 23.0                |
|                                         |              | Männer Mineralstoffe                  | 15                | 84               | 5.6               | 399                | 26.6                |
|                                         | Abtei        | Magnesium400 Plus Vitamin C+E         | 15                | 81               | 5.4               | 295                | 19.7                |
|                                         |              | Magnesium+ Kalium Aktiv Plus          | 15                | 82.5             | 5.5               | 275                | 18.3                |
|                                         | Sanotact     | Recovery+ Aminosäuren                 | 15                | 79.5             | 5.3               | 295                | 19.7                |
|                                         | Doppelherz   | VitaminC+ Zink                        | 15                | 94.5             | 6.3               | 295                | 19.7                |
|                                         |              | VitaminD3 2000 IE                     | 15                | 97.5             | 6.5               | 275                | 18.3                |
|                                         |              | A-Z Multivitamin+ Mineralien          | 15                | 93               | 6.2               | 279                | 18.6                |
| Magnesium 400                           |              | 15                                    | 97.5              | 6.5              | 275               | 18.3               |                     |

|  |             |                         |    |      |      |     |      |
|--|-------------|-------------------------|----|------|------|-----|------|
|  |             | Magnesium+ Calcium+ D3  | 15 | 97.5 | 6.5  | 279 | 18.6 |
|  |             | Magnesium 500+ B12      | 15 | 97.5 | 6.5  | 249 | 16.6 |
|  |             | Magnesium+ Kalium Sport | 15 | 99   | 6.6  | 299 | 19.9 |
|  | Fit + Vital | Caclium+ D3             | 20 | 80   | 4.0  | 139 | 7.0  |
|  |             | Multivitamin            | 20 | 80   | 4.0  | 45  | 2.3  |
|  |             | Vitamin C1000           | 15 | 93   | 6.2  | 139 | 9.3  |
|  |             | Multivitamin+ Mineral   | 20 | 80   | 4.0  | 45  | 2.3  |
|  |             | Magnesium               | 20 | 80   | 4.0  | 45  | 2.3  |
|  |             | Eisen+ VitaminC         | 20 | 80   | 4.0  | 139 | 7.0  |
|  |             | Cacium 1000             | 15 | 93   | 6.2  | 45  | 3.0  |
|  |             | Magnesium 400           | 15 | 81   | 5.4  | 45  | 3.0  |
|  | SilaVit     | Immun Aktiv             | 20 | 84   | 4.2  | 139 | 7.0  |
|  |             | Vitamin B12             | 20 | 80   | 4.0  | 125 | 6.3  |
|  |             | Vitamin C               | 20 | 80   | 4.0  | 45  | 2.3  |
|  | Isostar     | Hydrate & Perform       | 10 | 120  | 12.0 | 399 | 39.9 |

Supplement table 2. Sodium content of the included American products.

| Brand name®                                               | Manufacturer            | Category | Sodium content/tablet (mg) |
|-----------------------------------------------------------|-------------------------|----------|----------------------------|
| ActivJoint Tangerine                                      | Trace Minerals Research | Other    | 155                        |
| Advanced Anti-Aging Formula Effervescent Drink Mix Orange | TimeFighters            | Other    | 55                         |
| Airborne Dual Action Citrus                               | Airborne                | Vitamin  | 230                        |
| Airborne Elderberry Effervescent Tablets                  | Airborne                | Mineral  | 230                        |
| Airborne Immune Support Effervescent Tablets              | Airborne                | Vitamin  | 230                        |
| Airborne Vitamin C Original Lemon Lime                    | Airborne                | Vitamin  | 230                        |
| Airborne Zesty Orange                                     | Airborne                | Mineral  | 150                        |
| Alka-Seltzer Plus Immunity Complex                        | Bayer                   | Vitamin  | 313                        |
| Amino X Fruit Punch                                       | BSN                     | Other    | 160                        |
| AngiNOX Natural Orange Flavor                             | XYMOGEN                 | Other    | 220                        |
| Berocca Orange Flavor                                     | Bayer                   | Energy   | 260                        |
| Best Defense Orange Boost                                 | Herbalife Nutrition     | Vitamin  | 115                        |
| BetaBoost + Vitamin C Citrus                              | Airborne Advanced       | Vitamin  | 240                        |
| Carni-Fizz Natural Lemon Lime Flavor                      | Body Fizzics            | Other    | 245                        |
| CuraMed Natural Tangerine Flavor                          | Terry Naturally         | Other    | 130                        |
| CuraPro 350 mg Tangerine Effervescent                     | EuroMedica              | Mineral  | 130                        |

|    |                                                                     |                         |         |     |
|----|---------------------------------------------------------------------|-------------------------|---------|-----|
| 1  |                                                                     |                         |         |     |
| 2  |                                                                     |                         |         |     |
| 3  | Effer-C Lemon-Lime Effervescent Drink Mix                           | NOW                     | Vitamin | 50  |
| 4  | Effervescent Effer-Energy Tropical Punch                            | NOW Sports              | Mineral | 360 |
| 5  | Effervescent Effer-Hydrate                                          | NOW Sports              | Mineral | 360 |
| 6  | Effervescent Energy Lava Lime                                       | Eruption                | Energy  | 240 |
| 7  | Effervescent Vitamin C 1000 mg Natural Orange Flavor                | Sundown Naturals        | Vitamin | 60  |
| 8  | Effervescent Vitamin C Orange Flavored                              | 365 Everyday Value      | Vitamin | 60  |
| 9  |                                                                     |                         |         |     |
| 10 |                                                                     |                         |         |     |
| 11 | Energize Isotropin Lemon Flavor Effervescent                        | Newton-Everett          | Energy  | 150 |
| 12 | Energy Berry Blast                                                  | Nuun                    | Energy  | 100 |
| 13 |                                                                     |                         |         |     |
| 14 | Ester-C Effervescent 100 mg Plus Electrolytes Natural Orange Flavor | American Health         | Vitamin | 100 |
| 15 | Ester-C Effervescent 1000 mg Natural Orange Flavor                  | NatureSmart             | Vitamin | 100 |
| 16 | Ester-C Effervescent 1000 mg Natural Raspberry                      | American Health         | Vitamin | 55  |
| 17 | Ester-C Effervescent 1000 mg Natural Raspberry Flavor               | Solgar                  | Vitamin | 40  |
| 18 |                                                                     |                         |         |     |
| 19 | Evotest Black Cherry                                                | BSN                     | Other   | 300 |
| 20 |                                                                     |                         |         |     |
| 21 | Garcinia Cambogia Lineatabs Passion Fruit Flavor                    | Apax                    | Other   | 190 |
| 22 |                                                                     |                         |         |     |
| 23 | Green Superfood Detox Orange Turmeric Flavor                        | Amazing Grass           | Other   | 260 |
| 24 | Immune Oxylent Effervescent Supplement Drink                        | Immune Oxylent          | Vitamin | 90  |
| 25 | Immune Support Orange Flavor                                        | Equate                  | Vitamin | 230 |
| 26 |                                                                     |                         |         |     |
| 27 | Immuni-V Orange Effervescent                                        | MRI Performance         | Vitamin | 85  |
| 28 | Immunity Blueberry Tangerine                                        | Nuun                    | Vitamin | 100 |
| 29 |                                                                     |                         |         |     |
| 30 | Isotropin Rejuvenation Tangerine Flavor                             | NewtonEverett           | Other   | 255 |
| 31 | Liftoff Tropical Fruit Force                                        | Herbalife Nutrition     | Vitamin | 230 |
| 32 | Lineatabs                                                           | Apax                    | Other   | 270 |
| 33 |                                                                     |                         |         |     |
| 34 | Nuun Active Fruit Punch                                             | Nuun                    | Vitamin | 360 |
| 35 | Nuun Hydration Tri-Berry                                            | Nuun                    | Mineral | 360 |
| 36 | POW Berry-Melon Fizz                                                | EBOOST                  | Energy  | 190 |
| 37 | POW Berry-Melon Fizz                                                | EBOOST                  | Energy  | 155 |
| 38 |                                                                     |                         |         |     |
| 39 | Power Pak Cranberry                                                 | Trace Minerals Research | Vitamin | 175 |
| 40 |                                                                     |                         |         |     |
| 41 | Pumped Edge Fruit Punch                                             | BSN                     | Other   | 200 |
| 42 | Sambucus Fizzy Berry Flavored                                       | Nature's Way            | Other   | 160 |
| 43 | Sport +Caffeine Fresh Lime                                          | Nuun                    | Energy  | 300 |
| 44 | Sport Fruit Punch                                                   | Nuun                    | Mineral | 300 |
| 45 |                                                                     |                         |         |     |
| 46 | Sport Oxylent 3-In-1 Performance Supplement Drink Blueberry Burst   | Sport Oxylent           | Mineral | 90  |
| 47 |                                                                     |                         |         |     |
| 48 | Vitamins Blueberry Pomegranate                                      | Nuun                    | Vitamin | 100 |
| 49 | Wal-Born Orange Flavor                                              | Well At Walgreens       | Other   | 230 |
| 50 |                                                                     |                         |         |     |
| 51 | ZYM Electrolyte Drink Tablets                                       | ZYM                     | Mineral | 250 |
| 52 |                                                                     |                         |         |     |
| 53 |                                                                     |                         |         |     |
| 54 |                                                                     |                         |         |     |
| 55 |                                                                     |                         |         |     |
| 56 |                                                                     |                         |         |     |
| 57 |                                                                     |                         |         |     |
| 58 |                                                                     |                         |         |     |
| 59 |                                                                     |                         |         |     |
| 60 |                                                                     |                         |         |     |

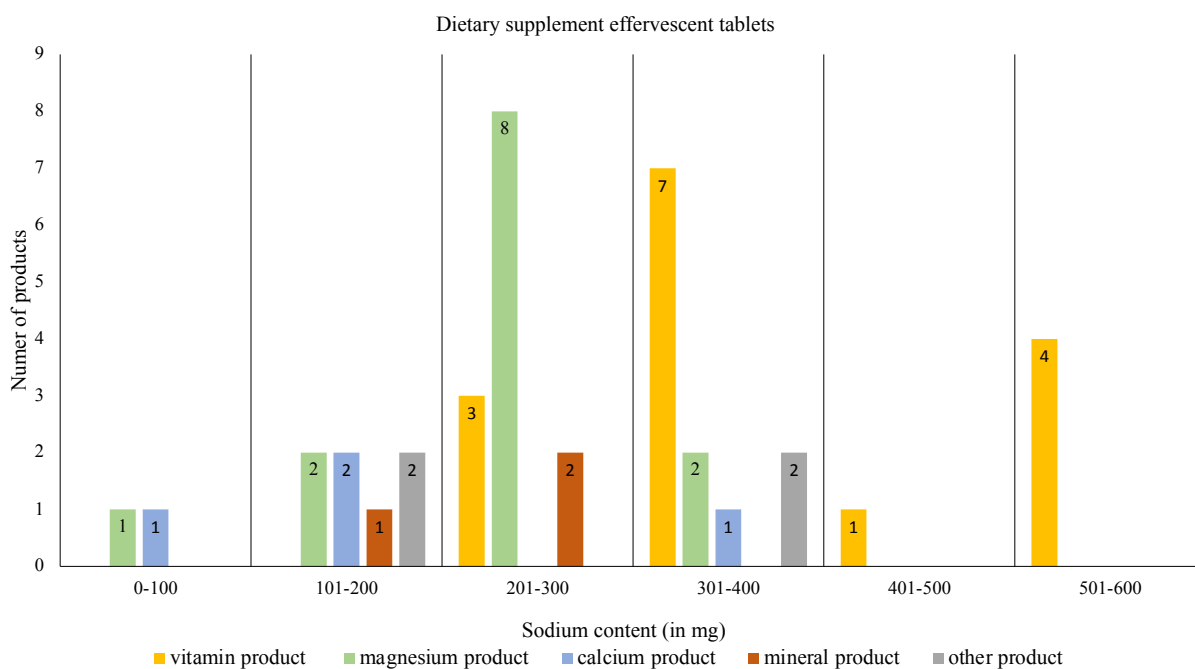

Supplement figure 1. Number of different German dietary supplement effervescent tablets that contain a certain amount of sodium (classified in 100 mg increments).

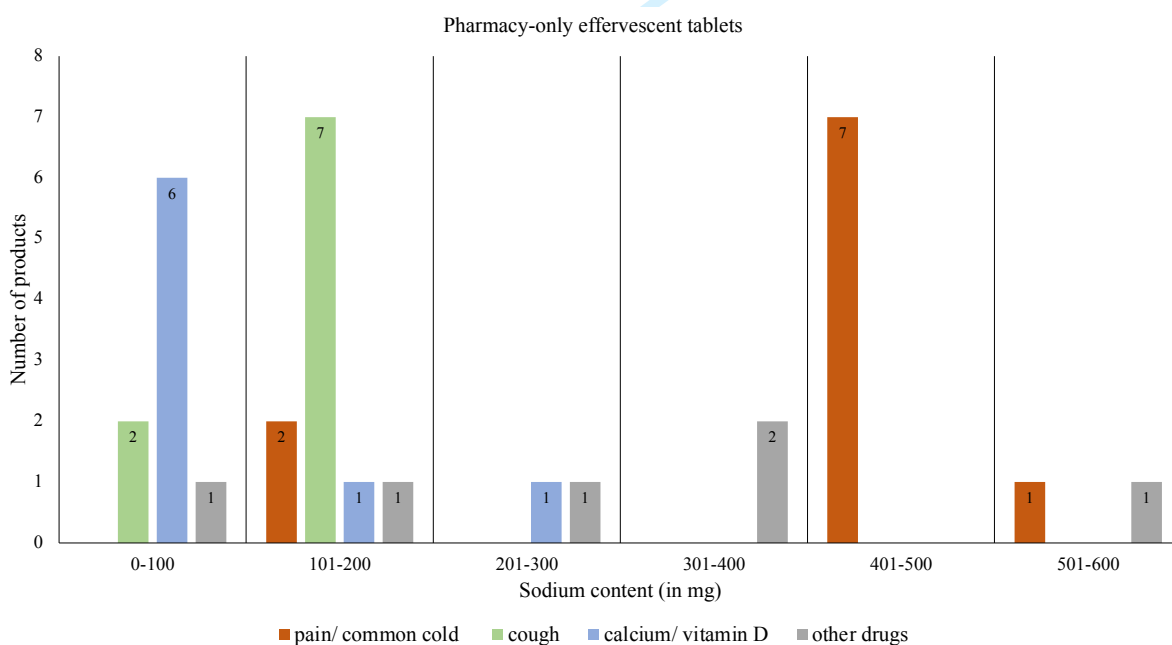

Supplement figure 2. Number of different pharmacy-only effervescent tablets that contain a certain amount of sodium (classified in 100 mg increments).



# BMJ Open

## The hidden sodium in effervescent tablets of dietary supplements and over-the-counter drugs – A comparative cross-sectional study

|                                 |                                                                                                                                                                                                                                                                                                                                                                                                                                                                                                                                                                                                                                                                                                                                                                                                                                                                                                                                                                                                                                                                                                                                                                                                                                                                                                                                                                                                                                                                                                                                                                                |
|---------------------------------|--------------------------------------------------------------------------------------------------------------------------------------------------------------------------------------------------------------------------------------------------------------------------------------------------------------------------------------------------------------------------------------------------------------------------------------------------------------------------------------------------------------------------------------------------------------------------------------------------------------------------------------------------------------------------------------------------------------------------------------------------------------------------------------------------------------------------------------------------------------------------------------------------------------------------------------------------------------------------------------------------------------------------------------------------------------------------------------------------------------------------------------------------------------------------------------------------------------------------------------------------------------------------------------------------------------------------------------------------------------------------------------------------------------------------------------------------------------------------------------------------------------------------------------------------------------------------------|
| Journal:                        | <i>BMJ Open</i>                                                                                                                                                                                                                                                                                                                                                                                                                                                                                                                                                                                                                                                                                                                                                                                                                                                                                                                                                                                                                                                                                                                                                                                                                                                                                                                                                                                                                                                                                                                                                                |
| Manuscript ID                   | bmjopen-2023-076302.R1                                                                                                                                                                                                                                                                                                                                                                                                                                                                                                                                                                                                                                                                                                                                                                                                                                                                                                                                                                                                                                                                                                                                                                                                                                                                                                                                                                                                                                                                                                                                                         |
| Article Type:                   | Original research                                                                                                                                                                                                                                                                                                                                                                                                                                                                                                                                                                                                                                                                                                                                                                                                                                                                                                                                                                                                                                                                                                                                                                                                                                                                                                                                                                                                                                                                                                                                                              |
| Date Submitted by the Author:   | 14-Sep-2023                                                                                                                                                                                                                                                                                                                                                                                                                                                                                                                                                                                                                                                                                                                                                                                                                                                                                                                                                                                                                                                                                                                                                                                                                                                                                                                                                                                                                                                                                                                                                                    |
| Complete List of Authors:       | <p>Kunz , Michael; Universitätsklinikum des Saarlandes und Medizinische Fakultät der Universität des Saarlandes, Department of Internal Medicine III Cardiology, Angiology and Intensive Care Medicine<br/> Götzinger, Felix; Universitätsklinikum des Saarlandes und Medizinische Fakultät der Universität des Saarlandes, Department of Internal Medicine III Cardiology, Angiology and Intensive Care Medicine<br/> Jacobs, Cathy M.; Saarland University, Department of Experimental and Clinical Toxicology<br/> Lauder, Lucas; Universitätsklinikum des Saarlandes und Medizinische Fakultät der Universität des Saarlandes, Klinik für Innere Medizin IIII<br/> Ukena, Christian; Universitätsklinikum des Saarlandes und Medizinische Fakultät der Universität des Saarlandes, Department of Internal Medicine III Cardiology, Angiology and Intensive Care Medicine<br/> Meyer, Markus; Saarland University, Department of Experimental and Clinical Toxicology<br/> Laufs, Ulrich; University Hospital Leipzig, Cardiology<br/> Schulz, Martin; Free University of Berlin, Department of Pharmacology; German Institute for Drug Use Evaluation<br/> Böhm, Michael; Universitätsklinikum des Saarlandes und Medizinische Fakultät der Universität des Saarlandes, Department of Internal Medicine III Cardiology, Angiology and Intensive Care Medicine<br/> Mahfoud, Felix; Universitätsklinikum des Saarlandes und Medizinische Fakultät der Universität des Saarlandes, Department of Internal Medicine III Cardiology, Angiology and Intensive Care Medicine</p> |
| <b>Primary Subject Heading</b>: | Cardiovascular medicine                                                                                                                                                                                                                                                                                                                                                                                                                                                                                                                                                                                                                                                                                                                                                                                                                                                                                                                                                                                                                                                                                                                                                                                                                                                                                                                                                                                                                                                                                                                                                        |
| Secondary Subject Heading:      | Cardiovascular medicine                                                                                                                                                                                                                                                                                                                                                                                                                                                                                                                                                                                                                                                                                                                                                                                                                                                                                                                                                                                                                                                                                                                                                                                                                                                                                                                                                                                                                                                                                                                                                        |
| Keywords:                       | Hypertension < CARDIOLOGY, Heart failure < CARDIOLOGY, Cardiology < INTERNAL MEDICINE, PREVENTIVE MEDICINE                                                                                                                                                                                                                                                                                                                                                                                                                                                                                                                                                                                                                                                                                                                                                                                                                                                                                                                                                                                                                                                                                                                                                                                                                                                                                                                                                                                                                                                                     |
|                                 |                                                                                                                                                                                                                                                                                                                                                                                                                                                                                                                                                                                                                                                                                                                                                                                                                                                                                                                                                                                                                                                                                                                                                                                                                                                                                                                                                                                                                                                                                                                                                                                |

SCHOLARONE™  
Manuscripts

1  
2  
3  
4  
5  
6  
7  
8  
9  
10  
11  
12  
13  
14  
15  
16  
17  
18  
19  
20  
21  
22  
23  
24  
25  
26  
27  
28  
29  
30  
31  
32  
33  
34  
35  
36  
37  
38  
39  
40  
41  
42  
43  
44  
45  
46  
47  
48  
49  
50  
51  
52  
53  
54  
55  
56  
57  
58  
59  
60



I, the Submitting Author has the right to grant and does grant on behalf of all authors of the Work (as defined in the below author licence), an exclusive licence and/or a non-exclusive licence for contributions from authors who are: i) UK Crown employees; ii) where BMJ has agreed a CC-BY licence shall apply, and/or iii) in accordance with the terms applicable for US Federal Government officers or employees acting as part of their official duties; on a worldwide, perpetual, irrevocable, royalty-free basis to BMJ Publishing Group Ltd ("BMJ") its licensees and where the relevant Journal is co-owned by BMJ to the co-owners of the Journal, to publish the Work in this journal and any other BMJ products and to exploit all rights, as set out in our [licence](#).

The Submitting Author accepts and understands that any supply made under these terms is made by BMJ to the Submitting Author unless you are acting as an employee on behalf of your employer or a postgraduate student of an affiliated institution which is paying any applicable article publishing charge ("APC") for Open Access articles. Where the Submitting Author wishes to make the Work available on an Open Access basis (and intends to pay the relevant APC), the terms of reuse of such Open Access shall be governed by a Creative Commons licence – details of these licences and which [Creative Commons](#) licence will apply to this Work are set out in our licence referred to above.

Other than as permitted in any relevant BMJ Author's Self Archiving Policies, I confirm this Work has not been accepted for publication elsewhere, is not being considered for publication elsewhere and does not duplicate material already published. I confirm all authors consent to publication of this Work and authorise the granting of this licence.

# The hidden sodium in effervescent tablets of dietary supplements and over-the-counter drugs – A comparative cross-sectional study

Michael Kunz<sup>1</sup>, Felix Götzinger<sup>1</sup>, Cathy M. Jacobs<sup>2</sup>, Lucas Lauder<sup>1</sup>, Christian Ukena<sup>1</sup>,  
Markus R. Meyer<sup>2</sup>, Ulrich Laufs<sup>3</sup>, Martin Schulz<sup>4,5</sup>, Michael Böhm<sup>1</sup>, Felix Mahfoud<sup>1</sup>

1. Department of Internal Medicine III, Cardiology, Angiology and Intensive Care Medicine, University Hospital Saarland, Saarland University, 66424 Homburg, Germany
2. Department of Experimental and Clinical Toxicology, Institute of Experimental and Clinical Pharmacology and Toxicology, Center for Molecular Signaling (PZMS), Saarland University, 66424 Homburg, Germany
3. Klinik und Poliklinik für Kardiologie, Universitätsklinikum Leipzig, 04103 Leipzig, Germany
4. German Institute for Drug Use Evaluation (DAPI) e.V., 10557 Berlin, Germany
5. Institute of Pharmacy, Freie Universität Berlin, 12169, Berlin, Germany

## Address for correspondence:

Dr. Michael Kunz, M.D.

Department for Internal Medicine III

Cardiology, Angiology, and Intensive Care Medicine

IMED, Geb. 41, Kirrberger Str. 1

Saarland University Hospital and Saarland University

66421 Homburg, Germany

Tel. +4968411615911; Fax +4968411615910

michael.kunz@uks.eu

## **Abstract**

Objective: Dietary sodium intake represents a risk factor for cardiovascular disease and mortality. The study sought to analyze the sodium content of effervescent dietary supplements and drugs in Germany and the United States of America.

Design: Comparative cross-sectional study.

Setting and Methods: The sodium content of 39 dietary supplement effervescent tablets available in Germany was measured using optical emission spectrometry with inductively coupled argon plasma. The sodium content of 33 common pharmacy-only effervescent tablets (“over-the-counter (OTC) drugs”) in Germany was obtained from the summary of product characteristics. We compared the sodium content of the measured German dietary supplement effervescent tablets to that of 51 dietary supplement effervescent tablets available in the United States of America (data: National Institutes of Health's Dietary Supplement Label Database).

Results: The measured sodium content in the German dietary supplements was  $283.9 \pm 122.6$  mg sodium/tablet, equivalent to  $14 \pm 6\%$  of the maximum recommended daily sodium intake (MRDSI). Vitamin products had the highest ( $378.3 \pm 112.8$  mg,  $19 \pm 6\%$  of MRDSI), and calcium products had the lowest mean sodium content ( $170.4 \pm 113.2$  mg,  $9 \pm 6\%$  of MRDSI). Vitamin products contained significantly more sodium than magnesium ( $p=0.004$ ), calcium ( $p=0.006$ ), and mineral products ( $p=0.048$ ). The sodium content measured in products available in Germany was higher when compared to the declared sodium content on the label of the products sold in the United States of America ( $p<0.001$ ). The median summary of product characteristics-declared sodium content of a single dose of the German OTC drugs was 157.0 mg (interquartile range (IQR): 98.9-417.3 mg); pain/common cold drugs contained the most sodium (median: 452.1 mg; IQR: 351.3-474.0 mg). The median sodium content of recommended daily doses of the pain/common cold drugs was 2,776.5 mg (IQR: 1,299.8-3,333.0 mg; 139% of the MRDSI).

1  
2  
3 Conclusion: Effervescent tablets of nutritional supplements and OTC drugs contain high  
4  
5 amounts of sodium, which often is not disclosed.  
6  
7  
8  
9  
10

### 11 **Data Availability Statement**

12  
13  
14 All data relevant to the study are included in the article or uploaded as supplementary  
15  
16 information. No additional data available.  
17  
18  
19  
20  
21  
22

### 23 **Key words:**

24  
25  
26 sodium, dietary supplement, effervescent tablets, over-the-counter drugs, salt, cardiovascular  
27  
28 risk, hypertension, heart failure  
29  
30  
31  
32  
33  
34

### 35 **Strengths and limitations of this study:**

- 36  
37  
38  
39  
40  
41  
42  
43  
44  
45  
46  
47  
48  
49  
50  
51  
52  
53  
54  
55  
56  
57  
58  
59  
60
- The measurement of sodium content in dietary supplement and pharmacy-only effervescent tablets gives detailed insights into the hidden sodium amounts in these dosage forms.
  - We provide sales figures for effervescent tablets sold in German pharmacies.
  - The quantity of dietary supplement effervescent tablets from discounters, grocery- and drugstores is not publicly available.
  - The association between the ingestion of effervescent tablets and cardiovascular outcomes was not investigated.

## **Introduction**

Dietary sodium intake is associated with elevated blood pressure (BP), increased cardiovascular events including stroke and death from any cause.[1–5] In patients with arterial hypertension, the long-term reduction of 1,800 mg less sodium/day (this corresponds to 4,600 mg table salt/day) was associated with a reduction in systolic/diastolic BP of 5.1/2.7 mmHg.[4] The extent of the sodium restriction was proportional to the reduction in BP, with a more pronounced effect in patients with hypertension.[6] Even modest reductions in dietary sodium have been shown to reduce cardiovascular events, including myocardial infarction and stroke.[1,7] Dietary sodium consumption is an important risk factor for premature death and disability-adjusted life-years globally.[7] The World Health Organization (WHO) recommends reducing sodium intake to <2,000 mg/day in adults, which is equivalent to 5,000 mg of table salt (sodium chloride).[8] However, only a small proportion of the population achieves this goal.[9] The daily amount of table salt consumed is often much higher (9,000-12,000 mg/day; 3,500-7,700 mg sodium/day), which may, in part, relate to hidden sodium consumption.[9,10]

Effervescent tablets often contain a relatively high amount of sodium in form of sodium bicarbonate, sodium carbonate, or sodium citrate and are frequently consumed without awareness of their sodium content.[11,12] This may be particularly relevant for dietary supplements and over-the-counter (OTC) effervescent tablets (e.g., vitamin C, magnesium, or analgesics) from groceries, drugstores, discounter, and pharmacies because many manufacturers do not provide information on sodium content on the label. The present study sought to provide information about the often not labeled sodium content of dietary supplement effervescent tablets from large groceries- and drugstores and sodium-containing effervescent tablets used as drugs from pharmacies. Country-specific differences in sodium content (products from Germany vs. products from the United States of America) were set forth.

## **Methods**

### *Study design*

A comparative cross-sectional study was conducted in 2022 and 2023 to examine and compare the sodium content of different categories of effervescent tablets.

### *Classification, place of purchase and analyses of the dietary supplements available in Germany*

The sodium content of 39 different dietary supplement effervescent tablets available in Germany (divided into the categories vitamins, magnesium, calcium, minerals, and other products) from 11 manufacturers and five distributors was analyzed in May and June 2022. The effervescent tablets were divided into categories based on the main active ingredient (e.g., if a product mainly contains magnesium and only a little calcium related to the recommended daily dose, then it is assigned to the category magnesium). The products were purchased from two discounters (ALDI SÜD GmbH & Co. and Netto Marken-Discount Stiftung & Co. KG), one grocery store (Edeka Stiftung & Co. KG), and two drugstores (DM drogerie markt GmbH & Co. KG and Müller Handels GmbH & Co. KG) in Germany and then delivered to the laboratory unopened.

The analyses were performed by an accredited chemical laboratory in Germany (CBA GmbH, Kirkel-Limbach, Germany, Deutsche Akkreditierungsstelle D-PL-14360-01-00). After appropriate standardized sample preparation, optical emission spectrometry with inductively coupled argon plasma (ICP-OES) was used for analysis. The sample preparation (pressure digestion in Teflon-pressure-vessels with microwave-assisted heating) proceeded as follows. The effervescent tablets were ground up and a sample amount corresponding to the expected sodium content was weighed out exactly. This amount of powder was displaced firstly with 1 mL water and then with 3 mL 65% nitric acid and transferred to the Teflon-pressure-vessel. The digestion took place at 180° Celsius in the digestion apparatus (microwave digestion



1  
2  
3 system, CEM) for at least 20 minutes, followed by a cooling period. The vessels were filled up  
4  
5 with water again to the nominal volume. Reference solutions and blank values were treated in  
6  
7 the same way. After sample preparation, the solutions were transferred directly into the ICP-  
8  
9 OES equipment (ICP-OES iCAP 6300 Duo, Thermo-Fisher Scientific). All digestion and  
10  
11 reference solutions were sprayed into an argon plasma, followed by selective detection of  
12  
13 sodium emission radiation at 589.59 nm.  
14  
15

### 16 17 *Classification and data source of the over-the-counter drugs*

18  
19  
20 The sodium content of 33 commonly sold pharmacy-only effervescent tablets (30 OTC and three  
21  
22 prescription drugs, all referred to as “OTC drugs” for convenience) from German pharmacies  
23  
24 was derived from the respective package inserts or summary of product characteristics. The  
25  
26 drugs were divided into the categories pain/common cold, cough, calcium/vitamin D, and other  
27  
28 drugs based on the main active ingredient. The analysis was based on data from the German  
29  
30 Institute for Drug Use Evaluation (Deutsches Arzneiprüfungsinstitut e.V. (DAPI)). This  
31  
32 database contains anonymized dispensing data from more than 95% of the community  
33  
34 pharmacies in all 16 German federal states, claimed at the expense of the statutory health  
35  
36 insurance (SHI) funds, and a DataWare House to identify every product by a specific code  
37  
38 (“Pharmazentralnummer”, PZN). The SHI system, consisting of nearly 100 funds, covers 88%  
39  
40 of the population i.e., approximately 73.3 million people. As the unit for prescribed drugs, we  
41  
42 used defined daily doses (DDD) – that is, the assumed average maintenance dose per day for a  
43  
44 drug used for its main indication in adults. Further, we analyzed the aggregate amount of  
45  
46 dispensed packages of drugs and diet supplements as effervescent tablets in community  
47  
48 pharmacies and via mail-order using dispensing data reimbursed by SHI funds as well as private  
49  
50 health insurance companies and over-the-counter sales from the INSIGHT Health  
51  
52 (<https://www.insight-health.de/>) and DatamedIQ (<https://www.datamediq.com/>) databases,  
53  
54 respectively. Usual package sizes of pain/common cold and cough effervescent tablets are 10  
55  
56  
57  
58  
59  
60

1  
2  
3 or 20, of calcium/vitamin D 20, 40, or 100 tablets. The sodium content of the maximum  
4 recommended daily dose was also specified and confirmed by the data in the package insert  
5  
6 and/or summary of products characteristics.  
7  
8  
9

### 10 *Classification and data source of the dietary supplements available in the United States of* 11 12 13 *America*

14  
15  
16 The sodium content of 51 dietary supplement effervescent tablets available in the United States  
17 of America was derived in May 2023 from the Dietary Supplement Label Database. The  
18 National Institutes of Health's Dietary Supplement Label Database includes 156,957 current  
19 and historical label information from products marketed in the US. Effervescent tablets with  
20 specified sodium content in the product information were included. The products were divided  
21 into the following categories based on the main active ingredient: vitamin, mineral, energy, and  
22 other products.  
23  
24  
25  
26  
27  
28  
29  
30  
31  
32

### 33 *Statistical methods*

34  
35  
36 The data are presented as means  $\pm$  standard deviation (SD), medians and interquartile ranges  
37 (IQR), or numbers (%). Normal distribution was tested using Kolmogorov-Smirnov/ Shapiro-  
38 Wilk test and using a histogram. Analysis of variance (ANOVA) was used (after tested for all  
39 assumptions for ANOVA: normally distribution, independence of cases, homogeneity of  
40 variance) for comparisons of normally distributed parameters, and for comparisons between  
41 non-normally distributed parameters, the Kruskal-Wallis test was used. If these tests were  
42 significant, we used a post hoc method (Dunn-Bonferroni) for pairwise comparisons. For  
43 comparisons between two non-normally distributed parameters, the Mann-Whitney-U-test was  
44 used. A two-sided p-value  $<0.05$  was considered statistically significant. Statistical analyses  
45 were performed with SPSS (version 27.0.1.0).  
46  
47  
48  
49  
50  
51  
52  
53  
54  
55  
56  
57  
58  
59  
60

### *Patient and public involvement*

1  
2  
3 None.  
4  
5  
6  
7  
8

## 9 **Results**

### 10 *Dietary supplement effervescent tablets in Germany*

11  
12  
13 Supplemental table 1 provides an overview of the included dietary supplement effervescent  
14  
15 tablets available in Germany. The median weight of one tablet was 5.5 g, and the price ranged  
16  
17 from 2.3 to 39.9 EUR cents/tablet (median price/tablet: 3.2 EUR cents). The sodium content of  
18  
19 the effervescent tablets measured by ICP-OES is listed in table 1. On average, one effervescent  
20  
21 tablet contained  $283.9 \pm 122.6$  mg sodium (table 2 A). Vitamin products had the highest  
22  
23 ( $378.3 \pm 112.8$  mg) and calcium products ( $170.4 \pm 113.2$  mg) the lowest mean sodium content.  
24  
25 Vitamin products contained significantly more sodium than magnesium ( $p=0.004$ ), calcium  
26  
27 ( $p=0.006$ ), and mineral ( $p=0.048$ ) products (figure 1). Based on the recommended maximum  
28  
29 intake of 2,000 mg sodium/day, a single effervescent tablet contained as much as 4-28% of the  
30  
31 maximum recommended daily sodium intake. The lowest sodium content/effervescent tablet  
32  
33 was 76 mg (Magnesium400®, Fit + Vital), and the highest was 564.7 mg (VitaminC1000®, Fit  
34  
35 + Vital). The median sodium content was 5.1 g/100 g effervescent tablets, with the highest  
36  
37 being 9.63 g sodium/100 g (Eisen + Vitamin C®, Fit + Vital). Supplement figure 1 depicts the  
38  
39 number of effervescent tablets according to sodium content (in 100 mg increments) grouped  
40  
41 per category. One of ten (10.3%) products contained more than 500 mg sodium/tablet. Only 5  
42  
43 (12.8%) products (all of the Mivolis brand) declared the sodium content on the packaging which  
44  
45 was nearly identical to the measured sodium content.  
46  
47  
48  
49  
50  
51  
52  
53  
54

### 55 *Dietary supplement effervescent tablets in the United States of America*

56  
57  
58 The sodium content of the various effervescent tablets is listed in Supplemental table 2. Among  
59  
60 all screened products ( $n=981$ ), only few declared the sodium content on the label (5.2%),

1  
2  
3 allowing 51 products to be included. The median sodium content of a single effervescent tablet  
4 was 190.0 mg (IQR: 100-250 mg; table 2 B) and no difference in sodium content between the  
5 various categories was found ( $p=0.061$ ). A single effervescent tablet contained 2-18% of the  
6 maximum recommended daily sodium content. The measured sodium content of dietary  
7 supplements available in Germany was higher when compared with the declared sodium  
8 content of products available in the United States of America ( $p<0.001$ ).  
9  
10  
11  
12  
13  
14  
15

### 16 17 *Pharmacy-only effervescent tablets*

18  
19  
20 The sodium content declared on the summary of product characteristics of the OTC drugs sold  
21 in Germany is listed in table 3. The median sodium content of a single effervescent tablet was  
22 157.0 mg (IQR: 98.9-417.3 mg; table 2 C). The percentage of sodium consumed per  
23 effervescent tablet in relation to the maximum recommended daily sodium intake ranged from  
24 3-29%. Pain/common cold drugs had the highest median sodium content (452.1 mg; IQR:  
25 351.3-474.0 mg) and calcium/vitamin D drugs the lowest (87.0 mg; IQR: 52.0-103.0 mg). A  
26 single pain/common cold effervescent tablet contained significantly more sodium than one  
27 calcium/vitamin D effervescent tablet ( $p<0.0001$ ). Supplement figure 2 depicts the number of  
28 effervescent tablets according to sodium content (in 100 mg increments) grouped per category.  
29  
30 The median sodium content of the recommended daily dose of all included drugs was 384.0 mg  
31 (IQR: 139.0-1295.5 mg; table 2 D) and for pain/common cold drugs 2,776.5 mg (IQR: 1,299.8-  
32 3,333.0 mg), representing 19%/139% of maximum recommended daily sodium intake,  
33 respectively. The intake of eight tablets (maximum recommended daily dose) of Alka-Seltzer  
34 classic® (aspirin, Bayer) would lead to the ingestion of 3,560 mg sodium (figure 2), which  
35 encompasses 178% of the maximum recommended daily sodium intake. The sodium content  
36 of the maximum daily dose of pain/common cold drugs was significantly higher than the  
37 sodium content of the maximum daily dose of calcium/vitamin D drugs ( $p<0.0001$ ) and cough  
38 drugs ( $p=0.007$ ). No significant difference in sodium content between the dietary supplement  
39  
40  
41  
42  
43  
44  
45  
46  
47  
48  
49  
50  
51  
52  
53  
54  
55  
56  
57  
58  
59  
60

1  
2  
3 calcium effervescent tablets and the pharmacy-only calcium/vitamin D effervescent tablets was  
4  
5 seen (p=0.109).  
6  
7

8 Supplement figure 3 summarizes the main results.  
9

## 10 11 12 13 14 **Discussion**

15  
16  
17 This study assessed the sodium content of nutritional supplement effervescent tablets available  
18 in Germany and found the sodium amount to range from 76.0 mg/tablet to 564.7 mg/tablet  
19 (average 283.9 mg/tablet) representing up to 28% of the maximum recommended daily sodium  
20 intake. Vitamin products contained more sodium than magnesium, calcium, and mineral  
21 products. The sodium amount/tablet of OTC drugs ranged from 52 mg to 575 mg (median 157.0  
22 mg) representing up to 29% of the maximum recommended daily sodium intake. The sodium  
23 content was particularly high for pain/common cold tablets. The intake of the recommended  
24 daily dose of one OTC drug would lead to a median consumption of 384.0 mg sodium, but as  
25 high as 2,776.5 mg for pain/common cold drugs. The major differences in the product classes'  
26 sodium contents are probably due to the variable CO<sub>2</sub>-dependent solubilities. More sodium  
27 bicarbonate and/or sodium citrate is required for poorly soluble active ingredients in  
28 effervescent tablets for them to dissolve quickly and completely in water. The large variations  
29 within individual product classes remain unexplained. Products available in the United States  
30 of America also contain a relevant amount of sodium (ranging from 40 to 360 mg/tablet). Of  
31 note, dietary supplement effervescent tablets available in Germany contained more sodium than  
32 declared in those available in the United States of America. This may, in part, be related to  
33 selection bias since only a few manufactures from the United States of America voluntarily  
34 provide information about the sodium content.  
35  
36  
37  
38  
39  
40  
41  
42  
43  
44  
45  
46  
47  
48  
49  
50  
51  
52  
53  
54  
55  
56  
57  
58  
59  
60

1  
2  
3 Dietary sodium intake has been linked with serious harmful effects, including BP elevation and  
4 all-cause death.[1,3,4,13,14] The 2017 report of the Global Burden of Disease study listed  
5 excess sodium intake among the major dietary risks, estimated to cause 3 million deaths every  
6 year worldwide.[7] A recently published, randomized trial in 20,995 subjects showed that using  
7 a table salt substitute containing 75% sodium chloride and 25% potassium chloride (as opposed  
8 to regular table salt containing 100% sodium chloride) reduced stroke, cardiovascular events,  
9 and death.[1] Consequently, the WHO recommends that daily sodium intake should not exceed  
10 2,000 mg.[8] Many national and international societies have advocated for actions to lower  
11 dietary sodium intake through public education, labelling of foods, and improved formulations  
12 of convenience food. Nonetheless, the daily sodium intake around the world is often much  
13 higher (9,000-12,000 mg table salt/day; 3,500-7,700 mg sodium/day), which may, in part, be  
14 aggravated by hidden sodium consumption.[10,15]

15  
16  
17 For improved and quick solubility, effervescent tablets contain often high amounts of  
18 sodium[11] as sodium bicarbonate, sodium carbonate, and/or sodium citrate. The impact of  
19 sodium-containing effervescent, mainly paracetamol (acetaminophen) tablets on BP, acute  
20 heart failure events, and cardiovascular risk was investigated in several studies.[16–19] The  
21 intake of effervescent paracetamol tablets (with 545 mg sodium/dose) was shown to increase  
22 24-hour systolic BP by 5.0 mmHg.[17] Other trials showed an association between the intake  
23 of sodium-containing effervescent paracetamol tablets (390-440 mg of sodium/tablet) and an  
24 increased risk of hospitalization for heart failure[18], cardiovascular risk, and all-cause  
25 mortality among patients with and without hypertension.[11,16,19] The mechanism by which  
26 the active substance paracetamol increases blood pressure has not been conclusively clarified;  
27 inter alia an influence on the cyclooxygenase pathway is discussed.[20,21] Nevertheless,  
28 sodium containing paracetamol effervescent tablets deteriorate blood pressure control mainly  
29 caused by the sodium in the effervescent tablets, as evident by the fact that after switching from  
30  
31  
32  
33  
34  
35  
36  
37  
38  
39  
40  
41  
42  
43  
44  
45  
46  
47  
48  
49  
50  
51  
52  
53  
54  
55  
56  
57  
58  
59  
60

1  
2  
3 paracetamol effervescent tablets to paracetamol tablets (without sodium), a decrease in blood  
4  
5 pressure was observed.[22]  
6  
7

8 This provides evidence that effervescent tablets increase sodium intake which might be  
9  
10 associated with an increased risk for cardiovascular diseases.[1,3,4,13,14] A large case-control  
11  
12 study comprising 1,292,337 patients with a mean follow-up of 7.2 years investigated the  
13  
14 association between cardiovascular events and sodium-containing effervescent, dispersible, and  
15  
16 soluble drugs.[19] Participants were prescribed sodium-containing formulations or matched  
17  
18 standard formulations of the same drug. A total of 61,072 patients with a cardiovascular event  
19  
20 were matched with controls. The sodium-containing substances were largely painkillers or  
21  
22 calcium drugs with a wide range of sodium content (4.6-427.8 mg/tablet).[19] The adjusted  
23  
24 odds ratio for exposure to sodium-containing drugs were 1.16 (95%-confidence interval (95%-  
25  
26 CI): 1.12-1.21) for the composite of myocardial infarction, stroke, or vascular death, 1.28 (95%-  
27  
28 CI: 1.23-1.33) for all-cause mortality, and 7.18 (95%-CI: 6.74-7.65) for hypertension.[19] Of  
29  
30 note, the sodium content of some of the included effervescent tablets in this study is comparable  
31  
32 with the sodium content of the drugs included in the mentioned study.[19] Consequently, the  
33  
34 consumption of effervescent tablets investigated herein may contribute to an increased  
35  
36 cardiovascular risk.  
37  
38  
39  
40  
41  
42  
43

44 The ancillary sodium intake through effervescent tablets is often neglected or unknown. Herein,  
45  
46 the average sodium content of effervescent food supplements tablets in Germany was 283.9  
47  
48 mg/tablet, and the median sodium content of the pharmacy-only effervescent tablets was 157.0  
49  
50 mg/tablet. Consuming one of the included effervescent vitamin tablets or pain/common cold  
51  
52 tablets corresponds to about one fifth (19%/23%) of the maximum recommended daily sodium  
53  
54 intake. Six products (8.3%) contained more than 500 mg sodium/tablet, Vitamin C 1000®  
55  
56 (fit+Vital) and Vitamin C+Zink+Selen+Vitamin D3® (elkos Vivede) had the highest amount  
57  
58 of sodium/tablet (564.7 mg and 541.1 mg) of the dietary supplements available in Germany.  
59  
60



1  
2  
3 Vitamin products contained significantly more sodium than magnesium ( $p=0.004$ ), calcium  
4 ( $p=0.006$ ) and mineral ( $p=0.048$ ) products; this might be due to different solubility properties.  
5  
6 Of the OTC drugs, doxylamine 25 mg (Gittalun®, Hermes Arzneimittel) and aspirin 500 mg  
7 (Aspirin Migräne®, Bayer) had the highest amount of sodium/tablet (575 mg and 544 mg).  
8  
9 With a maximum recommended daily dose of eight tablets/day, Alka-Seltzer classic® (324 mg  
10 aspirin, Bayer) would add a total of 3,560 mg sodium. The sodium content of the maximum  
11 daily dose of pain/common cold drugs was significantly higher than the sodium content of the  
12 maximum daily dose of calcium/vitamin D drugs ( $p<0.0001$ ) and cough drugs ( $p=0.007$ ). The  
13 majority of the general population and healthcare professionals alike are unaware of the high  
14 sodium content of effervescent tablets.[11]  
15  
16  
17  
18  
19  
20  
21  
22  
23  
24  
25  
26

27 A relevant proportion of the population regularly consumes effervescent tablets as a dietary  
28 supplement and/or drugs.[12] In a cross-sectional study from France including 1,043 healthy  
29 individuals, 26.9% of the participants reported regular intake of effervescent tablets (once in  
30 the last 30 days) and 7.3% reported intake of two or more effervescent tablets/week during the  
31 last 30 days.[12] A vast majority of 93.8% of these effervescent tablets were OTC drugs and  
32 nutritional supplements, such as vitamins.[12] The presence of hypertension, which should  
33 require table salt/sodium restriction, did not result in a reduced intake of effervescent  
34 tablets.[12]  
35  
36  
37  
38  
39  
40  
41  
42  
43  
44  
45

46 According to the Federal Statistical Office of Germany (Statistisches Bundesamt, Destatis), the  
47 production of dietary supplements in 2020, which include effervescent tablets, increased by  
48 11% compared with the previous year, most likely as a consequence of the COVID-19  
49 pandemic. In 2020, 180,200 tons of dietary supplements were produced with a value of 1.1  
50 billion Euros in Germany, which corresponds to an increase of 23.4%. In Germany, the sodium  
51 content must be indicated on the medicinal products sold in pharmacies but is not mandatory  
52 on dietary supplements sold in drugstores or supermarkets.[23,24] Only five (13%) of the  
53  
54  
55  
56  
57  
58  
59  
60



1  
2  
3 included dietary supplements available in Germany and only 5.2% of the investigated dietary  
4  
5 supplements available in the US declared sodium content on the packaging, hence, consumers  
6  
7 are frequently not informed.  
8  
9

10  
11 Various sodium-containing drugs administered as effervescent tablets are available. In German  
12  
13 pharmacies alone, 3.96 million packages of the included pain/common cold and 5.30 million  
14  
15 packs of the included cough effervescent tablets were sold in 2021. ([https://www.insight-](https://www.insight-health.de/)  
16  
17 [health.de/](https://www.datamediq.com/) and <https://www.datamediq.com/>) A total of 52.32 million DDD of calcium/vitamin  
18  
19 D drugs, mainly as effervescent tablets, were claimed by community pharmacies at the expense  
20  
21 of the SHI funds alone in Germany in 2021.[25] Based on these high sales, we assume that a  
22  
23 relevant proportion of the population, occasionally or regularly, consumes effervescent tablets.  
24  
25

26  
27 A dietary reduction of 1,200 mg sodium/day could translate into an annual reduction of 60,000-  
28  
29 120,000 new coronary heart disease patients, 32,000-66,000 fewer strokes, and 54,000-99,000  
30  
31 fewer myocardial infarctions in the United States of America.[13] This amount of sodium is  
32  
33 already contained in approximately 3 of the included effervescent vitamin tablets available in  
34  
35 Germany (378.3 mg sodium/tablet on average). A modelling study from China showed that a  
36  
37 reduction of 1,000 mg table salt/day could prevent approximately 9 million cardiovascular  
38  
39 events in China by 2030, of which approximately 4 million are fatal.[26] Of note, a total of  
40  
41 1,000 mg table salt contains approximately 394 mg sodium. This amount of sodium  
42  
43 approximately corresponds to the sodium content of one of the examined vitamin or  
44  
45 pain/common cold effervescent tablets.  
46  
47  
48  
49

50  
51 The intake of one sodium containing dietary supplement effervescent tablet per day for the  
52  
53 whole year increases cardiovascular risk more likely than several pain/common cold  
54  
55 effervescent tablets/day taken for 5-7 days only. A typical common cold lasts approximately  
56  
57 5-7 days, so the duration of the medical therapy is limited and the intake of OTC-effervescent  
58  
59 tablets is rarely permanent. However, studies investigating the (temporary) intake of sodium-  
60

1  
2  
3 containing acetaminophen (paracetamol) effervescent tablets showed an increased risk for  
4 hospitalization for acute heart failure, cardiovascular disease and all-cause mortality.[16,18].

5  
6  
7 The effect of permanent intake of sodium containing dietary supplement effervescent tablet  
8 could therefore be higher.  
9

10  
11  
12  
13 The benefits of pharmacotherapy should always outweigh the risks/side effects. Most likely,  
14 the majority of the general population is unaware of the sodium content of effervescent tablets  
15 and dietary supplements are often regarded as “sweets”. Dietary supplements are considered  
16 “foods” by regulators and health benefits of many dietary supplements for healthy,  
17 asymptomatic and well-nourished adults have not yet been demonstrated in randomized clinical  
18 trials.[27,28]. Consequently, the harm might outweigh the benefit when people ingest several  
19 vitamin and electrolyte effervescent tablets daily, assuming they are doing something good for  
20 their health.  
21  
22  
23  
24  
25  
26  
27  
28  
29  
30

### 31 32 *Limitations*

33  
34  
35 Some limitations of our study should be considered. This study provides relevant insights into  
36 the sodium content in dietary supplemental and pharmacy-only effervescent tablets but does  
37 not assess the association between the ingestion of these products and cardiovascular outcomes.  
38 Therefore, only assumptions can be made. Nevertheless, the included effervescent tablets  
39 contained a relevant amount of sodium comparable to prior studies investigating the association  
40 between sodium-containing effervescent tablets and cardiovascular risk. Randomized clinical  
41 trials are needed to examine the impact of effervescent tablets from grocery stores, discounters,  
42 drug stores, and pharmacies on cardiovascular risk. We provide sales figures for effervescent  
43 tablets sold in pharmacies. The quantity of dietary supplement effervescent tablets from  
44 discounters, grocery- and drugstores is not publicly available. Measured (Germany) sodium  
45 contents of dietary supplements were compared with declared (United States of America).  
46  
47  
48  
49  
50  
51  
52  
53  
54  
55  
56  
57  
58  
59  
60 Assuming the manufacture declares the correct sodium content on the packing, the detection of

1  
2  
3 national differences is possible. Nevertheless, the assumption that the declared sodium content  
4 of dietary supplements available in the United States of America are valide, is a limitation. It is  
5 not guaranteed that the ingredients declared on the packing are “correct”. [29–31]  
6  
7  
8  
9

### 10 *Conclusion*

11  
12  
13  
14 Dietary supplements and OTC effervescent tablets investigated herein contained high sodium,  
15 often unknown or neglected. Some products contain more sodium than others, although  
16 comparable in (active) ingredients. As the variability between preparations is high and these  
17 amounts of additional sodium intake may contribute to poor BP control and cardiovascular  
18 events, including hospitalization for acute heart failure and death, we think regulators should  
19 demand a front-package labelling of sodium content and associated risk before market access.  
20  
21 Based on the study findings, patients at risk should be advised to limit effervescent tablets to  
22 prevent the ingestion of hidden sodium. Finally, we suggest that manufacturers should be  
23 requested to reduce sodium in their effervescent formulations.  
24  
25  
26  
27  
28  
29  
30  
31  
32  
33  
34  
35  
36  
37  
38  
39  
40  
41  
42  
43  
44  
45  
46  
47  
48  
49  
50  
51  
52  
53  
54  
55  
56  
57  
58  
59  
60

### **Acknowledgments**

Not applicable.

### **Funding**

None.

### **Disclosures**

1  
2  
3 Michael Böhm is supported by the Deutsche Forschungsgemeinschaft (German Research  
4 Foundation; TTR 219, project number 322900939) and reports personal fees from Abbott,  
5  
6  
7 Amgen, Astra Zeneca, Bayer, Boehringer-Ingelheim, Cytokinetic, Edwards, Medtronic,  
8  
9  
10 Novartis, ReCor Medical, Servier and Vifor. Felix Mahfoud is supported by Deutsche  
11  
12 Gesellschaft für Kardiologie (DGK), Deutsche Forschungsgemeinschaft (SFB TRR219), and  
13  
14 Deutsche Herzstiftung and has received scientific support and/or speaker honoraria from Astra  
15  
16 Zeneca, Bayer, Boehringer Ingelheim, Medtronic, Merck, and ReCor Medical. Lucas Lauder  
17  
18 has received speaker honoraria from ReCor Medical and Medtronic. Christian Ukena has  
19  
20 received lecture honoraria or consulting fees from Bayer, Bristol Myers Squibb, Medtronic and  
21  
22 ReCor Medical. Ulrich Laufs has received speaker honoraria from Amgen, Daiichi Sankyo,  
23  
24 Novartis, and Sanofi, all outside the submitted work. Martin Schulz has received speaker  
25  
26 honoraria from BMS, Daiichi Sankyo, DGK-Academy, Pfizer, and Sanofi and consulting fees  
27  
28 from CSL Vifor, MSD and Novartis, all outside the submitted work. Felix Götzinger is  
29  
30 supported by German Foundation for Heart Research (Deutsche Herzstiftung) and has received  
31  
32 speaker honoraria from Astra Zeneca. The other authors do not have conflicts of interest.  
33  
34  
35  
36  
37  
38  
39

#### 40 **Authors' Contributions**

41  
42 Concept and design: Kunz, Götzinger, Schulz, Mahfoud.

43  
44 Acquisition, analysis, or interpretation of data: Kunz, Götzinger, Jacobs, Schulz, Mahfoud.

45  
46 Drafting of the manuscript: Kunz, Schulz, Mahfoud.

47  
48  
49 Critical revision of the manuscript for important intellectual content: Jacobs, Lauder, Ukena,  
50  
51 Meyer, Laufs, Schulz, Böhm, Mahfoud.

52  
53 Statistical analysis: Kunz, Lauder.

54  
55 Supervision: Böhm, Mahfoud.

56  
57  
58 The corresponding author attests that all listed authors meet authorship criteria and that no  
59  
60 others meeting the criteria have been omitted.

1  
2  
3  
4  
5 **Statement**  
6

7 The Corresponding Author has the right to grant on behalf of all authors and does grant on  
8 behalf of all authors, an exclusive licence (or non exclusive for government employees) on a  
9 worldwide basis to the BMJ Publishing Group Ltd to permit this article (if accepted) to be  
10 published in BMJ editions and any other BMJ PGL products and sublicences such use and  
11 exploit all subsidiary rights, as set out in our licence.  
12  
13  
14  
15  
16  
17  
18  
19  
20

21 **Ethical Approval**  
22

23 Not applicable.  
24  
25  
26  
27  
28  
29  
30  
31  
32  
33  
34  
35  
36  
37  
38  
39  
40  
41  
42  
43  
44  
45  
46  
47  
48  
49  
50  
51  
52  
53  
54  
55  
56  
57  
58  
59  
60

## References

- 1 Neal B, Wu Y, Feng X, *et al.* Effect of Salt Substitution on Cardiovascular Events and Death. *N Engl J Med* 2021;**385**:1067–77. doi:10.1056/NEJMoa2105675
- 2 He FJ, Tan M, Ma Y, *et al.* Salt Reduction to Prevent Hypertension and Cardiovascular Disease. *J Am Coll Cardiol* 2020;**75**:632–47. doi:10.1016/j.jacc.2019.11.055
- 3 Taylor RS, Ashton KE, Moxham T, *et al.* Reduced Dietary Salt for the Prevention of Cardiovascular Disease: A Meta-Analysis of Randomized Controlled Trials (Cochrane Review). *Am J Hypertens* 2011;**24**:843–53. doi:10.1038/ajh.2011.115
- 4 He FJ, Li J, MacGregor GA. Effect of longer-term modest salt reduction on blood pressure. *Cochrane Database Syst Rev* 2013;**2013**. doi:10.1002/14651858.CD004937.pub2
- 5 He FJ, MacGregor GA. Role of salt intake in prevention of cardiovascular disease: controversies and challenges. *Nat Rev Cardiol* 2018;**15**:371–7. doi:10.1038/s41569-018-0004-1
- 6 Huang L, Trieu K, Yoshimura S, *et al.* Effect of dose and duration of reduction in dietary sodium on blood pressure levels: systematic review and meta-analysis of randomised trials. *BMJ* 2020;**368**:m315. doi:10.1136/bmj.m315
- 7 Afshin A, Sur PJ, Fay KA, *et al.* Health effects of dietary risks in 195 countries, 1990–2017: a systematic analysis for the Global Burden of Disease Study 2017. *Lancet* 2019;**393**:1958–72. doi:10.1016/S0140-6736(19)30041-8
- 8 World Health Organization. Guideline: Sodium intake for adults and children. *World Heal Organ* 2012.
- 9 Powles J, Fahimi S, Micha R, *et al.* Global, regional and national sodium intakes in 1990

- 1  
2  
3 and 2010: a systematic analysis of 24 h urinary sodium excretion and dietary surveys  
4 worldwide. *BMJ Open* 2013;**3**:e003733. doi:10.1136/bmjopen-2013-003733  
5  
6  
7  
8  
9 10 He FJ, Burnier M, MacGregor GA. Nutrition in cardiovascular disease: salt in  
10 hypertension and heart failure. *Eur Heart J* 2011;**32**:3073–80.  
11 doi:10.1093/eurheartj/ehr194  
12  
13  
14  
15  
16 11 Schutte AE, Neal B. The sodium hidden in medication: a tough pill to swallow. *Eur*  
17 *Heart J* 2022;**43**:1756–8. doi:10.1093/eurheartj/ehab888  
18  
19  
20  
21  
22 12 Perrin G, Berdot S, Thomas F, *et al.* Evaluation of exposure to effervescent drugs in a  
23 large health check-up population in France: a cross-sectional study. *BMJ Open*  
24 2018;**8**:e022368. doi:10.1136/bmjopen-2018-022368  
25  
26  
27  
28  
29 13 Bibbins-Domingo K, Chertow GM, Coxson PG, *et al.* Projected Effect of Dietary Salt  
30 Reductions on Future Cardiovascular Disease. *N Engl J Med* 2010;**362**:590–9.  
31 doi:10.1056/NEJMoa0907355  
32  
33  
34  
35  
36  
37 14 He FJ, MacGregor GA. Salt reduction lowers cardiovascular risk: meta-analysis of  
38 outcome trials. *Lancet* 2011;**378**:380–2. doi:10.1016/S0140-6736(11)61174-4  
39  
40  
41  
42  
43 15 Brown IJ, Tzoulaki I, Candeias V, *et al.* Salt intakes around the world: implications for  
44 public health. *Int J Epidemiol* 2009;**38**:791–813. doi:10.1093/ije/dyp139  
45  
46  
47  
48 16 Zeng C, Rosenberg L, Li X, *et al.* Sodium-containing acetaminophen and cardiovascular  
49 outcomes in individuals with and without hypertension. *Eur Heart J* 2022;**43**:1743–55.  
50 doi:10.1093/eurheartj/ehac059  
51  
52  
53  
54  
55 17 Benitez-Camps M, Morros Padrós R, Pera-Pujadas H, *et al.* Effect of effervescent  
56 paracetamol on blood pressure. *J Hypertens* 2018;**36**:1656–62.  
57 doi:10.1097/HJH.0000000000001733  
58  
59  
60

- 1  
2  
3 18 Perrin G, Arnoux A, Berdot S, *et al.* Association Between Exposure to Effervescent  
4 Paracetamol and Hospitalization for Acute Heart Failure: A Case-Crossover Study. *J*  
5  
6  
7 *Clin Pharmacol* Published Online First: 19 February 2022. doi:10.1002/jcph.2027  
8  
9  
10  
11 19 George J, Majeed W, Mackenzie IS, *et al.* Association between cardiovascular events  
12 and sodium-containing effervescent, dispersible, and soluble drugs: nested case-control  
13 study. *BMJ* 2013;**347**:f6954–f6954. doi:10.1136/bmj.f6954  
14  
15  
16  
17  
18 20 Turtle EJ, Dear JW, Webb DJ. A systematic review of the effect of paracetamol on blood  
19 pressure in hypertensive and non-hypertensive subjects. *Br J Clin Pharmacol*  
20 2013;**75**:1396–405. doi:10.1111/bcp.12032  
21  
22  
23  
24  
25  
26 21 MacIntyre IM, Turtle EJ, Farrah TE, *et al.* Regular Acetaminophen Use and Blood  
27 Pressure in People With Hypertension: The PATH-BP Trial. *Circulation* 2022;**145**:416–  
28 23. doi:10.1161/CIRCULATIONAHA.121.056015  
29  
30  
31  
32  
33  
34 22 Ubeda A, Llopico J, Sanchez MT. Blood pressure reduction in hypertensive patients after  
35 withdrawal of effervescent medication. *Pharmacoepidemiol Drug Saf* 2009;**18**:417–9.  
36 doi:10.1002/pds.1701  
37  
38  
39  
40  
41  
42 23 Bundesministerium der Justiz, Bundesamt für Justiz. Verordnung über  
43 Nahrungsergänzungsmittel (Nahrungsergänzungsmittelverordnung - NemV).  
44 2017;:2011–3.  
45  
46  
47  
48  
49 24 Europäisches Parlament. RICHTLINIE 2002/46/EG DES EUROPÄISCHEN  
50 PARLAMENTS UND DES RATES vom 10. Juni 2002 zur Angleichung der  
51 Rechtsvorschriften der Mitgliedstaaten über Nahrungsergänzungsmittel. 2017;**21**:1–37.  
52  
53  
54  
55  
56  
57 25 Ludwig W-D, Mühlbauer B, Seifert R. *Arzneiverordnungs-Report 2021*. Springer 2021.  
58  
59  
60  
26 26 Tan M, He F, Morris JK, *et al.* Reducing daily salt intake in China by 1 g could prevent



- 1  
2  
3 almost 9 million cardiovascular events by 2030: a modelling study. *BMJ Nutr Prev Heal*  
4 2022;:e000408. doi:10.1136/bmjnph-2021-000408  
5  
6  
7  
8  
9 27 Ronis MJJ, Pedersen KB, Watt J. Adverse Effects of Nutraceuticals and Dietary  
10 Supplements. *Annu Rev Pharmacol Toxicol* 2018;**58**:583–601. doi:10.1146/annurev-  
11 pharmtox-010617-052844  
12  
13  
14  
15  
16 28 Moyer MW. Nutrition: Vitamins on trial. *Nature* 2014;**510**:462–4. doi:10.1038/510462a  
17  
18  
19 29 Andrews KW, Gusev PA, McNeal M, *et al.* Dietary Supplement Ingredient Database  
20 (DSID) and the Application of Analytically Based Estimates of Ingredient Amount to  
21 Intake Calculations. *J Nutr* 2018;**148**:1413S-1421S. doi:10.1093/jn/nxy092  
22  
23  
24  
25  
26  
27 30 Cohen PA, Avula B, Wang Y-H, *et al.* Quantity of Melatonin and CBD in Melatonin  
28 Gummies Sold in the US. *JAMA* 2023;**329**:1401. doi:10.1001/jama.2023.2296  
29  
30  
31  
32 31 Tucker J, Fischer T, Upjohn L, *et al.* Unapproved Pharmaceutical Ingredients Included  
33 in Dietary Supplements Associated With US Food and Drug Administration Warnings.  
34 *JAMA Netw Open* 2018;**1**:e183337. doi:10.1001/jamanetworkopen.2018.3337  
35  
36  
37  
38  
39  
40  
41  
42  
43  
44  
45  
46  
47  
48  
49  
50  
51  
52  
53  
54  
55  
56  
57  
58  
59  
60

**Tables**

**Table 1. Sodium content of German dietary supplement effervescent tablets**

| Category                        | Brand name®                                         | Sodium content/tablet (mg) | % of maximum recommended daily sodium intake* | Sodium (g)/100g product | Weight/tablet (g) |
|---------------------------------|-----------------------------------------------------|----------------------------|-----------------------------------------------|-------------------------|-------------------|
| Vitamins                        | fit+Vital Vitamin C1000                             | 564.70                     | 28                                            | 9.01                    | 6.27              |
|                                 | elkos Vivede Vitamin C +Zink, Selen, und Vitamin D3 | 541.10                     | 27                                            | 8.95                    | 6.05              |
|                                 | Doppelherz aktiv Vitamin C +Zink                    | 512.80                     | 26                                            | 8.11                    | 6.32              |
|                                 | ProLife Vitamin C +Zink, Selen, Vitamin D3          | 507.90                     | 25                                            | 8.48                    | 5.99              |
|                                 | Doppelherz aktiv Vitamin D3 2000 I.E.               | 485.10                     | 24                                            | 7.44                    | 6.52              |
|                                 | SilaVit Vitamin B12                                 | 367.30                     | 18                                            | 9.05                    | 4.06              |
|                                 | Vitalis Vitamin C 120 mg                            | 341.50                     | 17                                            | 8.54                    | 4.00              |
|                                 | Mivolis Vitamin B12                                 | 333.00                     | 17                                            | 8.08                    | 4.12              |
|                                 | Mivolis Vitamin C                                   | 330.30                     | 17                                            | 8.02                    | 4.12              |
|                                 | Doppelherz aktiv A-Z Multivitamin+ Mineralien       | 321.40                     | 16                                            | 5.10                    | 6.30              |
|                                 | SilaVit Vitamin C                                   | 318.00                     | 16                                            | 7.92                    | 4.02              |
|                                 | fit+Vital Multivitamin                              | 304.60                     | 15                                            | 7.57                    | 4.02              |
|                                 | elkos Vivede Multivitamin+ Mineralstoffe            | 273.50                     | 14                                            | 4.56                    | 6.00              |
|                                 | ProLife Multivitamin+ Mineralstoffe                 | 263.20                     | 13                                            | 4.38                    | 6.01              |
| fit+Vital Multivitamin+ Mineral | 210.70                                              | 11                         | 5.26                                          | 4.01                    |                   |
| Magnesium                       | Doppelherz aktiv Magnesium 400                      | 332.50                     | 17                                            | 5.11                    | 6.51              |
|                                 | Vitalis Magnesium 240 mg                            | 306.10                     | 15                                            | 5.58                    | 5.49              |
|                                 | Abtei Magnesium 400 Plus Vitamin C+E                | 298.70                     | 15                                            | 5.56                    | 5.38              |
|                                 | Doppelherz aktiv Magnesium+ Calcium+ D3             | 271.20                     | 14                                            | 4.12                    | 6.59              |
|                                 | Doppelherz aktiv Magnesium 500+ B12                 | 268.90                     | 13                                            | 4.12                    | 6.53              |

|                                                                                                    |                                                    |        |    |      |       |
|----------------------------------------------------------------------------------------------------|----------------------------------------------------|--------|----|------|-------|
|                                                                                                    | Mivolis Magnesium                                  | 262.70 | 13 | 6.39 | 4.11  |
|                                                                                                    | elkos Vivede Magnesium+ B-Komplex, Vitamin C und E | 248.40 | 12 | 4.13 | 6.01  |
|                                                                                                    | Doppelherz aktiv Magnesium+ Kalium Sport           | 245.50 | 12 | 3.72 | 6.60  |
|                                                                                                    | ProLife Magnesium+ B-Komplex, Vitamin C&E          | 238.00 | 12 | 3.95 | 6.03  |
|                                                                                                    | Kneipp Magnesium+ Calcium+ D3                      | 221.30 | 11 | 4.91 | 4.51  |
|                                                                                                    | Abtei Magnesium+ Kalium Aktiv Plus                 | 138.10 | 7  | 2.52 | 5.48  |
|                                                                                                    | fit+Vital Magnesium                                | 117.80 | 6  | 2.95 | 3.99  |
|                                                                                                    | fit+Vital Magnesium 400                            | 76.00  | 4  | 1.40 | 5.41  |
| Calcium                                                                                            | ProLife Calcium+ Vitamin K1, D3, Folsäure          | 335.90 | 17 | 5.60 | 6.00  |
|                                                                                                    | Mivolis Calcium                                    | 145.90 | 7  | 3.53 | 4.14  |
|                                                                                                    | fit+Vital Calcium+ D3                              | 116.20 | 6  | 2.89 | 4.02  |
|                                                                                                    | fit+Vital Calcium 1000                             | 83.70  | 4  | 1.36 | 6.17  |
| Minerals                                                                                           | Kneipp Männer Mineralstoffe                        | 217.00 | 11 | 3.87 | 5.61  |
|                                                                                                    | Kneipp Frauen Mineralstoffe                        | 209.40 | 10 | 3.33 | 6.29  |
|                                                                                                    | Mivolis Multi-Mineral                              | 148.40 | 7  | 3.62 | 4.10  |
| Other products                                                                                     | fit+Vital Eisen+ Vitamin C                         | 382.90 | 19 | 9.63 | 3.98  |
|                                                                                                    | SilaVit Immun Aktiv                                | 363.80 | 18 | 8.55 | 4.25  |
|                                                                                                    | sanotact Recovery+ Aminosäuren                     | 187.60 | 9  | 3.54 | 5.29  |
|                                                                                                    | isostar Hydrate & Perform                          | 181.00 | 9  | 1.51 | 11.99 |
| *Maximum recommended daily sodium intake according to World Health Organization recommendations[8] |                                                    |        |    |      |       |

**Table 2. Sodium content per: (A) Dietary supplement effervescent tablet available in Germany, (B) Dietary supplement effervescent tablet in the United States of America, (C) OTC effervescent tablet, (D) recommended daily dose of the included OTC effervescent tablets**

| <b>A</b>                 |                                                                   |                                                                       |
|--------------------------|-------------------------------------------------------------------|-----------------------------------------------------------------------|
| <b>Category</b>          | <b>Sodium content (mg)/tablet mean±SD</b>                         | <b>% of the maximum recommended daily sodium intake* mean±SD</b>      |
| ...all included products | 283.9±122.6                                                       | 14±6                                                                  |
| ...vitamin products      | 378.3±112.8                                                       | 19±6                                                                  |
| ...magnesium products    | 232.7±76.7                                                        | 12±4                                                                  |
| ...calcium products      | 170.4±113.2                                                       | 9±6                                                                   |
| ...mineral products      | 191.6±37.6                                                        | 10±2                                                                  |
| ...other products        | 278.8±109.5                                                       | 14±6                                                                  |
| <b>B</b>                 |                                                                   |                                                                       |
| <b>Category</b>          | <b>Sodium content (mg)/tablet Median (IQR)</b>                    | <b>% of the maximum recommended daily sodium intake* Median (IQR)</b> |
| ...all included products | 190.0 (100.0-250.0)                                               | 10 (5-13)                                                             |
| ...vitamin products      | 100.0 (72.5-230.0)                                                | 5 (4-12)                                                              |
| ...mineral products      | 250.0 (140.0-360.0)                                               | 13 (7-18)                                                             |
| ...energy products       | 190.0 (150.0-260.0)                                               | 10 (8-13)                                                             |
| ...other products        | 210.0 (158.8-256.3)                                               | 11 (8-13)                                                             |
| <b>C</b>                 |                                                                   |                                                                       |
| <b>Category</b>          | <b>Sodium content (mg)/tablet Median (IQR)</b>                    | <b>% of the maximum recommended daily sodium intake* Median (IQR)</b> |
| ...all included drugs    | 157.0 (98.9-417.3)                                                | 8 (5-21)                                                              |
| ...pain/common cold      | 452.1 (351.3-474.0)                                               | 23 (18-24)                                                            |
| ...cough                 | 138.8 (112.8-157.9)                                               | 7 (6-8)                                                               |
| ...calcium/vitamin D     | 87.0 (52.0-103.0)                                                 | 4 (3-5)                                                               |
| ...other drugs           | 267.0 (119.8-387.5)                                               | 13 (6-19)                                                             |
| <b>D</b>                 |                                                                   |                                                                       |
| <b>Category</b>          | <b>Sodium content (mg) of the maximum daily dose Median (IQR)</b> | <b>% of the maximum recommended daily sodium intake* Median (IQR)</b> |
| ...all included drugs    | 384.0 (139.0-1295.5)                                              | 19 (7-65)                                                             |
| ...pain/common cold      | 2,776.5 (1,299.8-3,333.0)                                         | 139 (65-167)                                                          |
| ...cough                 | 297.0 (144.5-427.0)                                               | 15 (7-21)                                                             |
| ...calcium/vitamin D     | 104.0 (96.3-104.8)                                                | 5 (5-5)                                                               |

|                                                                                                                                                                               |                       |            |
|-------------------------------------------------------------------------------------------------------------------------------------------------------------------------------|-----------------------|------------|
| ...other drugs                                                                                                                                                                | 801.0 (312.8-1,155.5) | 40 (16-58) |
| *Maximum recommended daily sodium intake according to World Health Organization recommendations[8]<br>IQR= interquartile range; OTC= over-the-counter, SD= standard deviation |                       |            |

For peer review only

**Table 3. Sodium content of OTC effervescent tablets**

| Category                                         | Brand name® (manufacturer)                           | sodium content/tablet (mg) | % of the maximum recommended daily sodium intake* of one tablet | sodium content of maximum recommended daily dose (mg) | % of maximum recommended daily sodium intake* of the maximum recommended daily dose | Maximum recommended tablets per day | OTC                                                      | Active ingredients                        | Sales figures                                            |
|--------------------------------------------------|------------------------------------------------------|----------------------------|-----------------------------------------------------------------|-------------------------------------------------------|-------------------------------------------------------------------------------------|-------------------------------------|----------------------------------------------------------|-------------------------------------------|----------------------------------------------------------|
| Pain/common cold (frequently dispensed products) | Aspirin Migräne (Bayer)                              | 544                        | 27                                                              | 3,264                                                 | 163                                                                                 | 6                                   | yes                                                      | aspirin                                   | 3.96 million packs of this class sold in 2021 in Germany |
|                                                  | ASS + C-ratiopharm gegen Schmerzen (Ratiopharm)      | 477                        | 24                                                              | 2,385                                                 | 119                                                                                 | 5                                   | yes                                                      | aspirin, ascorbic acid                    |                                                          |
|                                                  | ASPIRIN plus C forte (Bayer)                         | 473                        | 24                                                              | 1,419                                                 | 71                                                                                  | 3                                   | yes                                                      | aspirin, ascorbic acid                    |                                                          |
|                                                  | ASPIRIN plus C (Bayer)                               | 466                        | 23                                                              | 2,796                                                 | 140                                                                                 | 6                                   | yes                                                      | Aspirin, ascorbic acid                    |                                                          |
|                                                  | Togal Kopfschmerz-Brause + Vitamin C (Kyberg Pharma) | 459                        | 23                                                              | 2,754                                                 | 138                                                                                 | 6                                   | yes                                                      | Aspirin, ascorbic acid, caffeine          |                                                          |
|                                                  | Alka-Seltzer classic (Bayer)                         | 445                        | 22                                                              | 3,560                                                 | 178                                                                                 | 8                                   | yes                                                      | aspirin                                   |                                                          |
|                                                  | FIZAMOL 500 mg (Accord Healthcare)                   | 419                        | 21                                                              | 3,352                                                 | 168                                                                                 | 8                                   | yes                                                      | acetaminophen                             |                                                          |
|                                                  | PARACETAMOL-ratiopharm 500 mg (Ratiopharm)           | 416                        | 21                                                              | 3,328                                                 | 166                                                                                 | 8                                   | yes                                                      | acetaminophen                             |                                                          |
|                                                  | WICK DayMed Erkältungsgetränk (WICK Pharma)          | 157                        | 8                                                               | 942                                                   | 47                                                                                  | 6                                   | yes                                                      | acetaminophen, guaifenesin, phenylephrine |                                                          |
| Grippostad C Stickpack (STADA Consumer Health)   | 128                                                  | 6                          | 384                                                             | 19                                                    | 3                                                                                   | yes                                 | acetaminophen, chlorpheniramine, ascorbic acid, caffeine |                                           |                                                          |
| Cough (frequently dispensed products)            | NAC-ratiopharm 200 mg, (Ratiopharm)                  | 190                        | 10                                                              | 570                                                   | 29                                                                                  | 3                                   | yes                                                      | acetylcysteine                            | 5.30 million packs of this class sold in 2021 in Germany |
|                                                  | Fluimucil 200 mg (Zambon)                            | 158                        | 8                                                               | 474                                                   | 24                                                                                  | 3                                   | no                                                       | acetylcysteine                            |                                                          |
|                                                  | Fluimucil long 600 mg (Zambon)                       | 158                        | 8                                                               | 158                                                   | 8                                                                                   | 1                                   | no                                                       | acetylcysteine                            |                                                          |
|                                                  | NAC-ratiopharm 600 mg (Ratiopharm)                   | 150                        | 8                                                               | 150                                                   | 8                                                                                   | 1                                   | yes                                                      | acetylcysteine                            |                                                          |
|                                                  | ACC akut 600mg (Hexal)                               | 139                        | 7                                                               | 139                                                   | 7                                                                                   | 1                                   | yes                                                      | acetylcysteine                            |                                                          |
|                                                  | NAC 600 akut (IA Pharma)                             | 139                        | 7                                                               | 139                                                   | 7                                                                                   | 1                                   | yes                                                      | acetylcysteine                            |                                                          |
|                                                  | Ambrobeta 30 (betapharm Arzneimittel)                | 127                        | 6                                                               | 381                                                   | 19                                                                                  | 3                                   | yes                                                      | ambroxol                                  |                                                          |
|                                                  | ACC akut 200mg (Hexal)                               | 99                         | 5                                                               | 297                                                   | 15                                                                                  | 3                                   | yes                                                      | acetylcysteine                            |                                                          |
| NAC 200 akut (IA Pharma)                         | 99                                                   | 5                          | 297                                                             | 15                                                    | 3                                                                                   | yes                                 | acetylcysteine                                           |                                           |                                                          |

|                                                                                                                                                                                        |                                                         |     |    |       |    |    |     |                     |                                                                                                                           |
|----------------------------------------------------------------------------------------------------------------------------------------------------------------------------------------|---------------------------------------------------------|-----|----|-------|----|----|-----|---------------------|---------------------------------------------------------------------------------------------------------------------------|
| Calcium/<br>vitamin D3<br>(colecalfiferol;<br>examples of<br>frequently<br>prescribed<br>effervescent<br>tablets)                                                                      | Calcium Sandoz forte (Hexal)                            | 288 | 14 | 864   | 43 | 3  | yes | Calcium + vitamin D | 52.32 million<br>DDD of the<br>entire class<br>claimed to the<br>expense of the<br>SHI funds in<br>2021 in<br>Germany[25] |
|                                                                                                                                                                                        | Calcium D3 acis 1.200/ 800 (acis<br>Arzneimittel)       | 105 | 5  | 105   | 5  | 1  | yes | Calcium + vitamin D |                                                                                                                           |
|                                                                                                                                                                                        | CalciCare-D3 forte 1.000 mg/<br>880 I.E. (ORION Pharma) | 97  | 5  | 97    | 5  | 1  | yes | Calcium + vitamin D |                                                                                                                           |
|                                                                                                                                                                                        | Calcilac 1000 mg/ 880 I.E.<br>(MIBE Arzneimittel)       | 96  | 5  | 96    | 5  | 1  | yes | Calcium + vitamin D |                                                                                                                           |
|                                                                                                                                                                                        | Osteoplus 1.000 mg/ 1.000 I.E.<br>(Recordati Pharma)    | 78  | 4  | 78    | 4  | 1  | yes | Calcium + vitamin D |                                                                                                                           |
|                                                                                                                                                                                        | Calcigen D 600/ 400 (MEDA<br>Pharma)                    | 52  | 3  | 104   | 5  | 2  | yes | Calcium + vitamin D |                                                                                                                           |
|                                                                                                                                                                                        | Calcium D3-ratiopharm 600/ 400<br>(Ratiopharm)          | 52  | 3  | 104   | 5  | 2  | yes | Calcium + vitamin D |                                                                                                                           |
|                                                                                                                                                                                        | Calcium Sandoz D Osteo 600<br>mg/ 400 I.E. (Hexal)      | 52  | 3  | 104   | 5  | 2  | yes | Calcium + vitamin D |                                                                                                                           |
| Other drugs<br>(examples)                                                                                                                                                              | Gittalun (Hermes Arzneimittel)                          | 575 | 29 | 1,150 | 58 | 2  | yes | doxylamine          | -                                                                                                                         |
|                                                                                                                                                                                        | Zink-ratiopharm 25mg<br>(Ratiopharm)                    | 325 | 16 | 325   | 16 | 1  | yes | zinc                |                                                                                                                           |
|                                                                                                                                                                                        | Magnesium Verla (Verla-Pharm<br>Arzneimittel)           | 314 | 16 | 942   | 47 | 3  | yes | magnesium           |                                                                                                                           |
|                                                                                                                                                                                        | Lösferron (MIBE Arzneimittel)                           | 220 | 11 | 660   | 33 | 3  | yes | Fe-(II)-D-gluconat  |                                                                                                                           |
|                                                                                                                                                                                        | Magnesiocard 7,5 mmol (Verla-<br>Pharm Arzneimittel)    | 138 | 7  | 276   | 14 | 2  | yes | magnesium           |                                                                                                                           |
|                                                                                                                                                                                        | Morphin Painbreak akut 20 mg<br>(PB Pharma)             | 65  | 3  | 1,170 | 59 | 18 | no  | morphine            |                                                                                                                           |
| *Maximum recommended daily sodium intake according to World Health Organization recommendations[8]<br>DDD= defined daily doses; OTC= over-the-counter; SHI= statutory health insurance |                                                         |     |    |       |    |    |     |                     |                                                                                                                           |

1  
2  
3 **Figure Legends**  
4

5  
6 Figure 1. Mean sodium content of the respective category of the dietary supplement  
7  
8 effervescent tablets available in Germany.  
9

10  
11 Figure 2. Sodium content of the maximum recommended daily dose of some included  
12  
13 effervescent OTC tablets.  
14  
15  
16  
17  
18  
19  
20  
21  
22  
23  
24  
25  
26  
27  
28  
29  
30  
31  
32  
33  
34  
35  
36  
37  
38  
39  
40  
41  
42  
43  
44  
45  
46  
47  
48  
49  
50  
51  
52  
53  
54  
55  
56  
57  
58  
59  
60

For peer review only



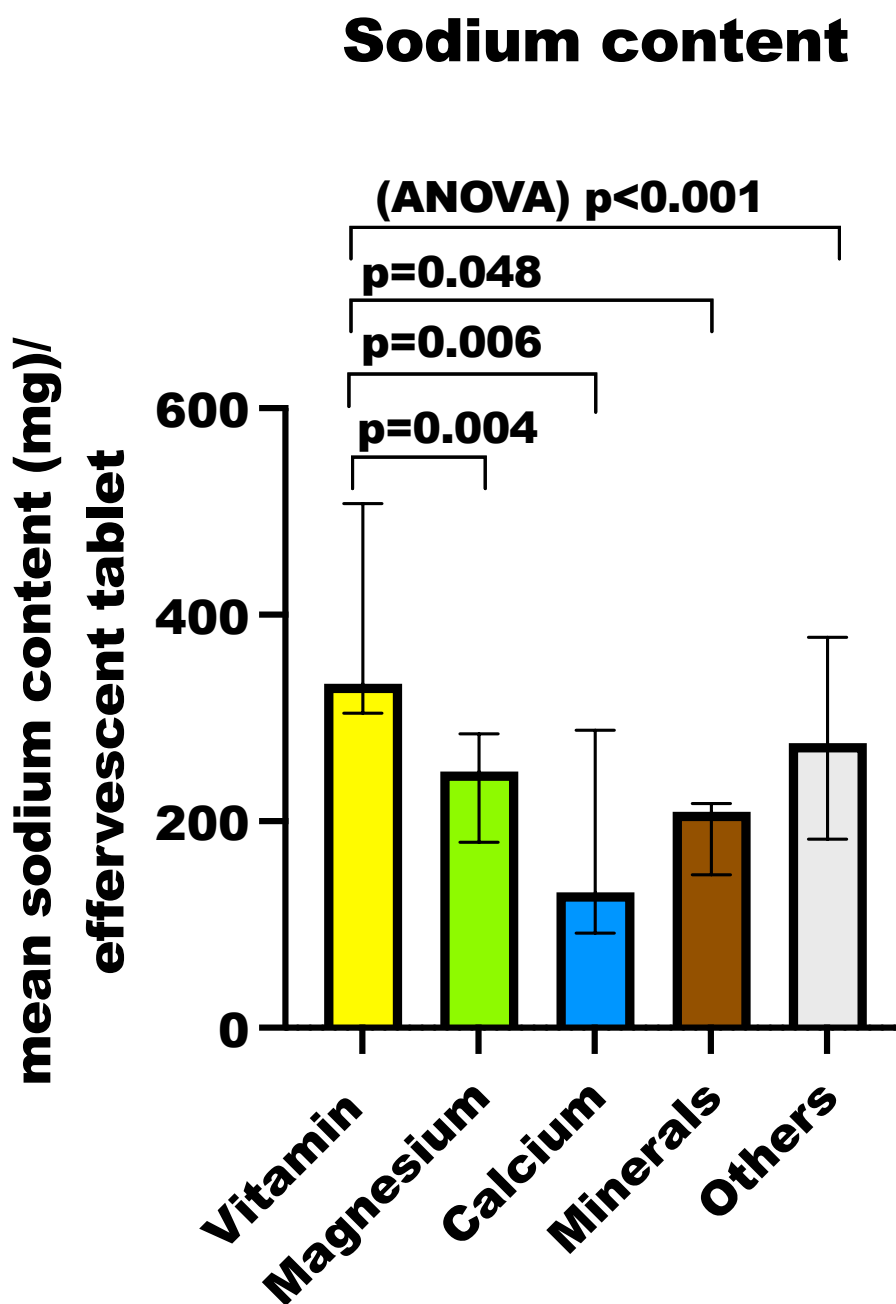

Figure 1. Mean sodium content of the respective category of the German dietary supplement effervescent tablets. P values are given for between-group comparisons (adjusted for post hoc method). ANOVA = analysis of variance.

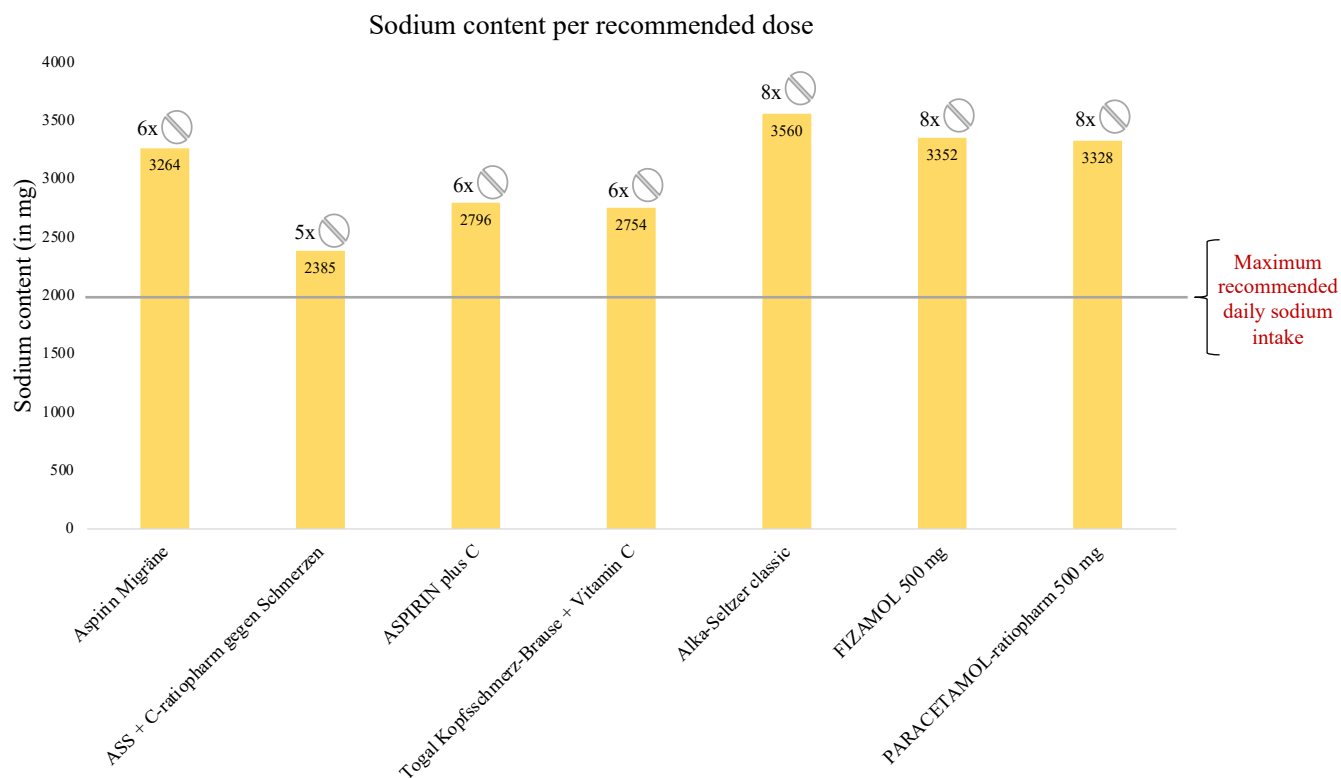

Figure 2. Sodium content of the maximum recommended daily dose of some included effervescent OTC tablets. The number above the bars corresponds to the maximum daily number of tablets. (Aspirin Migräne®: Bayer; ASS + C-ratiopharm gegen Schmerzen®: Ratiopharm; ASPIRIN plus C®: Bayer; Total Kopfschmerz-Brause + Vitamin C®: Kyberg Pharma; Alka-Seltzer classic®: Bayer; FIZAMOL 500 mg®: Accord Healthcare, Paracetamol-ratiopharm 500mg®: Ratiopharm)

1  
2  
3 Supplemental table 1. Overview of the included German products.  
4

5 Supplemental table 2. Sodium content of the included products from the United States of  
6  
7 America.  
8  
9

10 Supplement figure 1. Number of different German dietary supplement effervescent tablets that  
11  
12 contain a certain amount of sodium (classified in 100 mg increments).  
13  
14

15  
16 Supplement figure 2. Number of different pharmacy-only effervescent tablets that contain a  
17  
18 certain amount of sodium (classified in 100 mg increments).  
19  
20

21 Supplement figure 3. Central illustration.  
22  
23  
24  
25  
26  
27  
28  
29  
30  
31  
32  
33  
34  
35  
36  
37  
38  
39  
40  
41  
42  
43  
44  
45  
46  
47  
48  
49  
50  
51  
52  
53  
54  
55  
56  
57  
58  
59  
60

Supplement table 1. Overview of the included German products.

| Offeror                                 | Manufacturer | Brand name®                           | Number of tablets | Total weight (g) | Weight/tablet (g) | Total price (cent) | Price/tablet (cent) |
|-----------------------------------------|--------------|---------------------------------------|-------------------|------------------|-------------------|--------------------|---------------------|
| ALDI SÜD GmbH & Co.                     | Vitalis      | Magnesium 240 mg                      | 14                | 78               | 5.6               | 45                 | 3.2                 |
|                                         |              | VitaminC 120 mg                       | 20                | 80               | 4.0               | 45                 | 2.3                 |
| Edeka Stiftung & Co. KG                 | ELKOS Vivede | VitaminC+ Zink, Selen, Vitamin D3     | 17                | 102              | 6.0               | 55                 | 3.2                 |
|                                         |              | Magnesium+ B-Komplex, Vitamin C und E | 17                | 102              | 6.0               | 55                 | 3.2                 |
|                                         |              | Multivitamin+ Mineralstoffe           | 17                | 102              | 6.0               | 55                 | 3.2                 |
| Netto Marken-Discount Stiftung & Co. KG | ProLife      | VitaminC+ Zink, Selen, Vitamin D3     | 17                | 102              | 6.0               | 55                 | 3.2                 |
|                                         |              | Magnesium+ B-Komplex, Vitamin C&E     | 17                | 102              | 6.0               | 55                 | 3.2                 |
|                                         |              | Multivitamin+ Mineralstoffe           | 17                | 102              | 6.0               | 55                 | 3.2                 |
|                                         |              | Calcium+ Vitamin K1, D3, Folsäure     | 17                | 102              | 6.0               | 55                 | 3.2                 |
| DM drogerie markt GmbH & Co. KG         | Mivolis      | Magnesium                             | 20                | 82               | 4.1               | 45                 | 2.3                 |
|                                         |              | VitaminB12                            | 20                | 82               | 4.1               | 45                 | 2.3                 |
|                                         |              | Calcium                               | 20                | 82               | 4.1               | 45                 | 2.3                 |
|                                         |              | Multi-Mineral                         | 20                | 82               | 4.1               | 45                 | 2.3                 |
|                                         |              | VitaminC                              | 20                | 82               | 4.1               | 45                 | 2.3                 |
|                                         | Kneipp       | Magnesium+ Calcium+ D3                | 20                | 90               | 4.5               | 245                | 12.3                |
| Müller Handels GmbH & Co. KG            | Kneipp       | Frauen Mineralstoffe                  | 15                | 94               | 6.3               | 345                | 23.0                |
|                                         |              | Männer Mineralstoffe                  | 15                | 84               | 5.6               | 399                | 26.6                |
|                                         | Abtei        | Magnesium400 Plus Vitamin C+E         | 15                | 81               | 5.4               | 295                | 19.7                |
|                                         |              | Magnesium+ Kalium Aktiv Plus          | 15                | 82.5             | 5.5               | 275                | 18.3                |
|                                         | Sanotact     | Recovery+ Aminosäuren                 | 15                | 79.5             | 5.3               | 295                | 19.7                |
|                                         | Doppelherz   | VitaminC+ Zink                        | 15                | 94.5             | 6.3               | 295                | 19.7                |
|                                         |              | VitaminD3 2000 IE                     | 15                | 97.5             | 6.5               | 275                | 18.3                |
|                                         |              | A-Z Multivitamin+ Mineralien          | 15                | 93               | 6.2               | 279                | 18.6                |
| Magnesium 400                           |              | 15                                    | 97.5              | 6.5              | 275               | 18.3               |                     |

|  |             |                         |    |      |      |     |      |
|--|-------------|-------------------------|----|------|------|-----|------|
|  |             | Magnesium+ Calcium+ D3  | 15 | 97.5 | 6.5  | 279 | 18.6 |
|  |             | Magnesium 500+ B12      | 15 | 97.5 | 6.5  | 249 | 16.6 |
|  |             | Magnesium+ Kalium Sport | 15 | 99   | 6.6  | 299 | 19.9 |
|  | Fit + Vital | Caclium+ D3             | 20 | 80   | 4.0  | 139 | 7.0  |
|  |             | Multivitamin            | 20 | 80   | 4.0  | 45  | 2.3  |
|  |             | Vitamin C1000           | 15 | 93   | 6.2  | 139 | 9.3  |
|  |             | Multivitamin+ Mineral   | 20 | 80   | 4.0  | 45  | 2.3  |
|  |             | Magnesium               | 20 | 80   | 4.0  | 45  | 2.3  |
|  |             | Eisen+ VitaminC         | 20 | 80   | 4.0  | 139 | 7.0  |
|  |             | Cacium 1000             | 15 | 93   | 6.2  | 45  | 3.0  |
|  |             | Magnesium 400           | 15 | 81   | 5.4  | 45  | 3.0  |
|  | SilaVit     | Immun Aktiv             | 20 | 84   | 4.2  | 139 | 7.0  |
|  |             | Vitamin B12             | 20 | 80   | 4.0  | 125 | 6.3  |
|  |             | Vitamin C               | 20 | 80   | 4.0  | 45  | 2.3  |
|  | Isostar     | Hydrate & Perform       | 10 | 120  | 12.0 | 399 | 39.9 |

Supplement table 2. Sodium content of the included products from the United States of America.

| Brand name®                                               | Manufacturer            | Category | Sodium content/tablet (mg) |
|-----------------------------------------------------------|-------------------------|----------|----------------------------|
| ActivJoint Tangerine                                      | Trace Minerals Research | Other    | 155                        |
| Advanced Anti-Aging Formula Effervescent Drink Mix Orange | TimeFighters            | Other    | 55                         |
| Airborne Dual Action Citrus                               | Airborne                | Vitamin  | 230                        |
| Airborne Elderberry Effervescent Tablets                  | Airborne                | Mineral  | 230                        |
| Airborne Immune Support Effervescent Tablets              | Airborne                | Vitamin  | 230                        |
| Airborne Vitamin C Original Lemon Lime                    | Airborne                | Vitamin  | 230                        |
| Airborne Zesty Orange                                     | Airborne                | Mineral  | 150                        |
| Alka-Seltzer Plus Immunity Complex                        | Bayer                   | Vitamin  | 313                        |
| Amino X Fruit Punch                                       | BSN                     | Other    | 160                        |
| AngiNOX Natural Orange Flavor                             | XYMOGEN                 | Other    | 220                        |
| Berocca Orange Flavor                                     | Bayer                   | Energy   | 260                        |
| Best Defense Orange Boost                                 | Herbalife Nutrition     | Vitamin  | 115                        |
| BetaBoost + Vitamin C Citrus                              | Airborne Advanced       | Vitamin  | 240                        |
| Carni-Fizz Natural Lemon Lime Flavor                      | Body Fizzics            | Other    | 245                        |
| CuraMed Natural Tangerine Flavor                          | Terry Naturally         | Other    | 130                        |

|    |                                                                     |                         |         |     |
|----|---------------------------------------------------------------------|-------------------------|---------|-----|
| 1  |                                                                     |                         |         |     |
| 2  |                                                                     |                         |         |     |
| 3  | CuraPro 350 mg Tangerine Effervescent                               | EuroMedica              | Mineral | 130 |
| 4  | Effer-C Lemon-Lime Effervescent Drink Mix                           | NOW                     | Vitamin | 50  |
| 5  |                                                                     |                         |         |     |
| 6  | Effervescent Effer-Energy Tropical Punch                            | NOW Sports              | Mineral | 360 |
| 7  | Effervescent Effer-Hydrate                                          | NOW Sports              | Mineral | 360 |
| 8  |                                                                     |                         |         |     |
| 9  | Effervescent Energy Lava Lime                                       | Eruption                | Energy  | 240 |
| 10 | Effervescent Vitamin C 1000 mg Natural Orange Flavor                | Sundown Naturals        | Vitamin | 60  |
| 11 | Effervescent Vitamin C Orange Flavored                              | 365 Everyday Value      | Vitamin | 60  |
| 12 |                                                                     |                         |         |     |
| 13 | Energize Isotropin Lemon Flavor Effervescent                        | Newton-Everett          | Energy  | 150 |
| 14 | Energy Berry Blast                                                  | Nuun                    | Energy  | 100 |
| 15 |                                                                     |                         |         |     |
| 16 | Ester-C Effervescent 100 mg Plus Electrolytes Natural Orange Flavor | American Health         | Vitamin | 100 |
| 17 | Ester-C Effervescent 1000 mg Natural Orange Flavor                  | NatureSmart             | Vitamin | 100 |
| 18 |                                                                     |                         |         |     |
| 19 | Ester-C Effervescent 1000 mg Natural Raspberry                      | American Health         | Vitamin | 55  |
| 20 | Ester-C Effervescent 1000 mg Natural Raspberry Flavor               | Solgar                  | Vitamin | 40  |
| 21 |                                                                     |                         |         |     |
| 22 | Evotest Black Cherry                                                | BSN                     | Other   | 300 |
| 23 | Garcinia Cambogia Lineatabs Passion Fruit Flavor                    | Apax                    | Other   | 190 |
| 24 | Green Superfood Detox Orange Turmeric Flavor                        | Amazing Grass           | Other   | 260 |
| 25 |                                                                     |                         |         |     |
| 26 | Immune Oxylent Effervescent Supplement Drink                        | Immune Oxylent          | Vitamin | 90  |
| 27 | Immune Support Orange Flavor                                        | Equate                  | Vitamin | 230 |
| 28 | Immuni-V Orange Effervescent                                        | MRI Performance         | Vitamin | 85  |
| 29 |                                                                     |                         |         |     |
| 30 | Immunity Blueberry Tangerine                                        | Nuun                    | Vitamin | 100 |
| 31 | Isotropin Rejuvenation Tangerine Flavor                             | NewtonEverett           | Other   | 255 |
| 32 | Liftoff Tropical Fruit Force                                        | Herbalife Nutrition     | Vitamin | 230 |
| 33 |                                                                     |                         |         |     |
| 34 | Lineatabs                                                           | Apax                    | Other   | 270 |
| 35 | Nuun Active Fruit Punch                                             | Nuun                    | Vitamin | 360 |
| 36 | Nuun Hydration Tri-Berry                                            | Nuun                    | Mineral | 360 |
| 37 |                                                                     |                         |         |     |
| 38 | POW Berry-Melon Fizz                                                | EBOOST                  | Energy  | 190 |
| 39 | POW Berry-Melon Fizz                                                | EBOOST                  | Energy  | 155 |
| 40 |                                                                     |                         |         |     |
| 41 | Power Pak Cranberry                                                 | Trace Minerals Research | Vitamin | 175 |
| 42 | Pumped Edge Fruit Punch                                             | BSN                     | Other   | 200 |
| 43 | Sambucus Fizzy Berry Flavored                                       | Nature's Way            | Other   | 160 |
| 44 |                                                                     |                         |         |     |
| 45 | Sport +Caffeine Fresh Lime                                          | Nuun                    | Energy  | 300 |
| 46 | Sport Fruit Punch                                                   | Nuun                    | Mineral | 300 |
| 47 |                                                                     |                         |         |     |
| 48 | Sport Oxylent 3-In-1 Performance Supplement Drink Blueberry Burst   | Sport Oxylent           | Mineral | 90  |
| 49 | Vitamins Blueberry Pomegranate                                      | Nuun                    | Vitamin | 100 |
| 50 |                                                                     |                         |         |     |
| 51 | Wal-Born Orange Flavor                                              | Well At Walgreens       | Other   | 230 |
| 52 | ZYM Electrolyte Drink Tablets                                       | ZYM                     | Mineral | 250 |
| 53 |                                                                     |                         |         |     |
| 54 |                                                                     |                         |         |     |
| 55 |                                                                     |                         |         |     |
| 56 |                                                                     |                         |         |     |
| 57 |                                                                     |                         |         |     |
| 58 |                                                                     |                         |         |     |
| 59 |                                                                     |                         |         |     |
| 60 |                                                                     |                         |         |     |

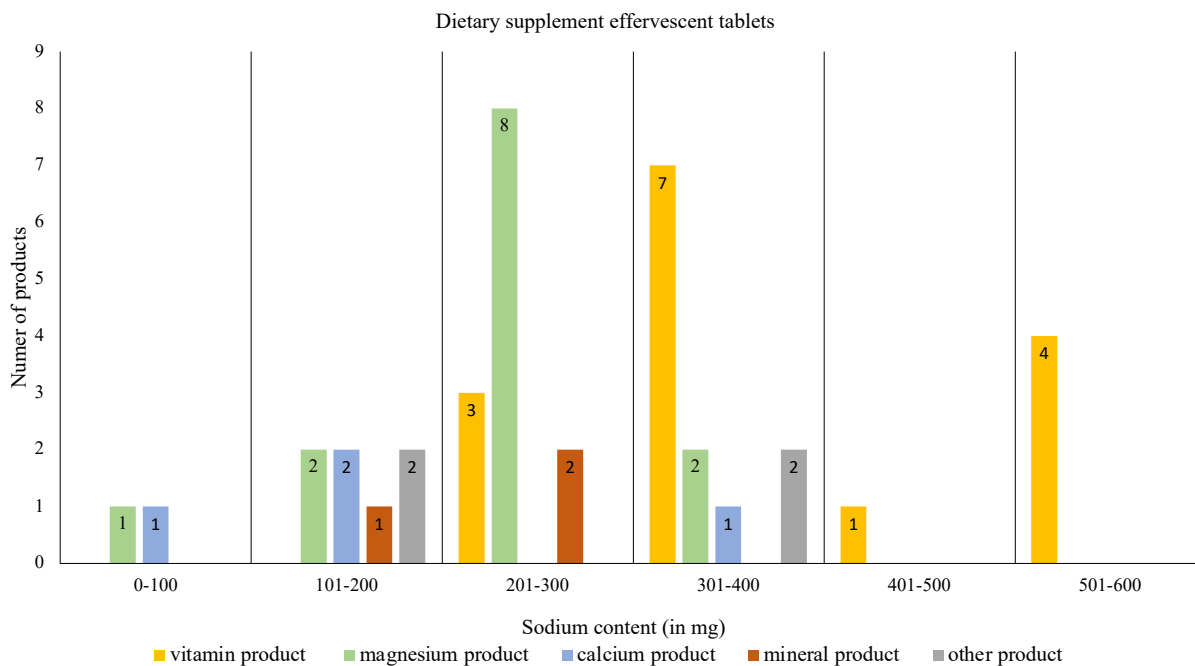

Supplement figure 1. Number of different German dietary supplement effervescent tablets that contain a certain amount of sodium (classified in 100 mg increments).

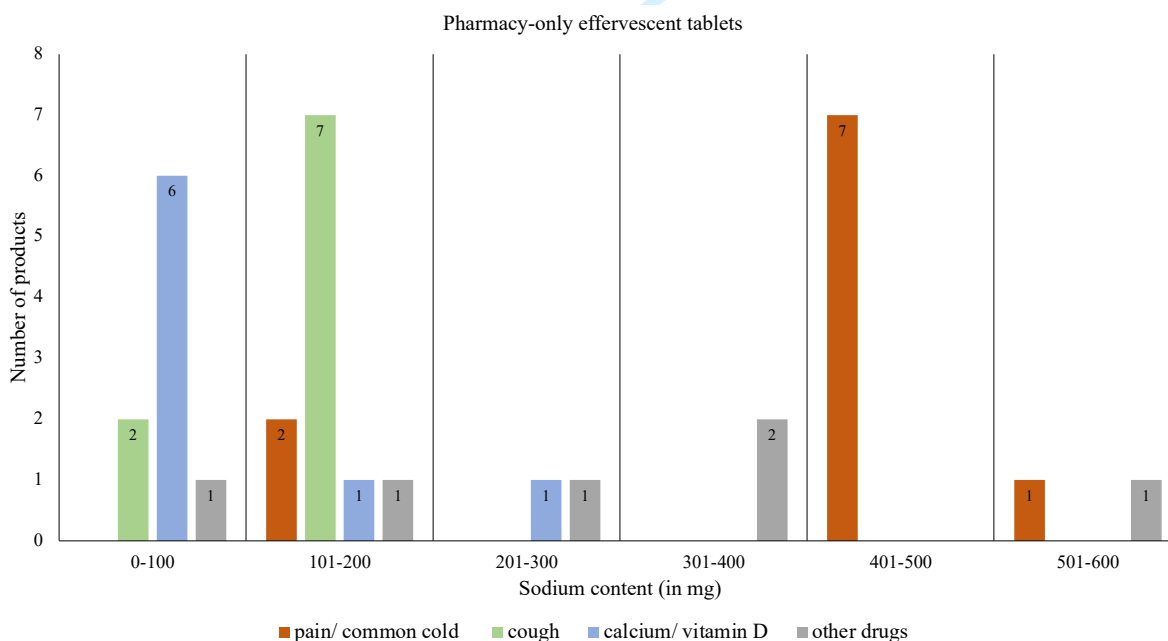

Supplement figure 2. Number of different pharmacy-only effervescent tablets that contain a certain amount of sodium (classified in 100 mg increments)

### What is known ?

- Dietary sodium intake → BP ↑ and CV events ↑
- Recommended daily sodium intake: < 2000 mg
- ETs contain high amounts of sodium (often not labeled)
- approx. 30% of the population regularly consume ETs as dietary supplements and/or drugs

### Dietary supplement ETs

- 39 included
- Average sodium content: 283.9±122.6 mg → 4-28% of the RDSI
- Highest average sodium content: vitamin products (378.3±112.8 mg)
- Lowest average sodium content: calcium products (170.4±113.2 mg)
- Vitamin products: more sodium than magnesium ( $p=0.004$ ), calcium ( $p=0.006$ ) and mineral ( $p=0.048$ ) products

### Pharmacy-only ETs

- Median sodium content: 157.0 mg (IQR: 98.9-417.3 mg) → 3-29% of the RDSI
- Highest median sodium content: pain/ common cold drugs (452.1 mg; IQR: 351.3-474.0 mg)
- Lowest median sodium content: calcium/ vitamin D drugs (87.0 mg; IQR: 52.0-103.0 mg)
- Median sodium content of the MDD of pain/ common cold drugs: 2,776.5 mg (IQR: 1,299.8-3,333.0 mg)

### Conclusion

- ETs contain a relevant amount of sodium (often unknown or neglected)
- Additional sodium intake → poor BP control and CV events ↑
- Sodium loaded ETs should be avoided in patients at risk

Approximately 30% of the overall population

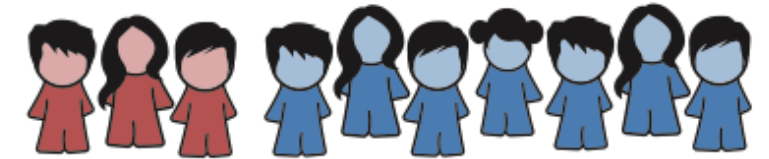

Sodium consumption

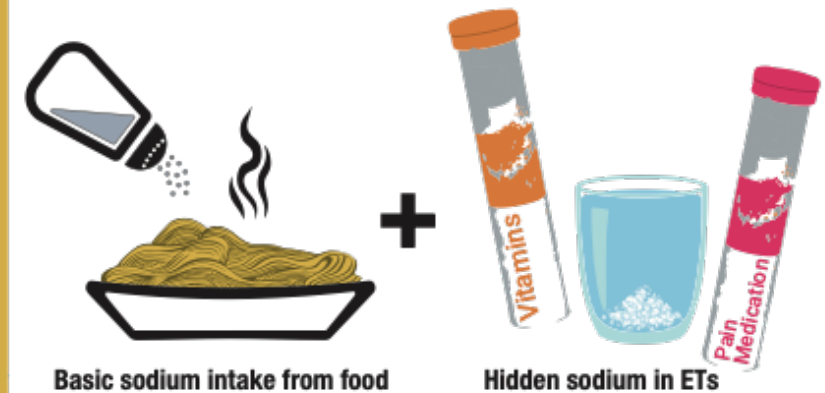

Basic sodium intake from food

Hidden sodium in ETs

>2000 mg Sodium consumption per day

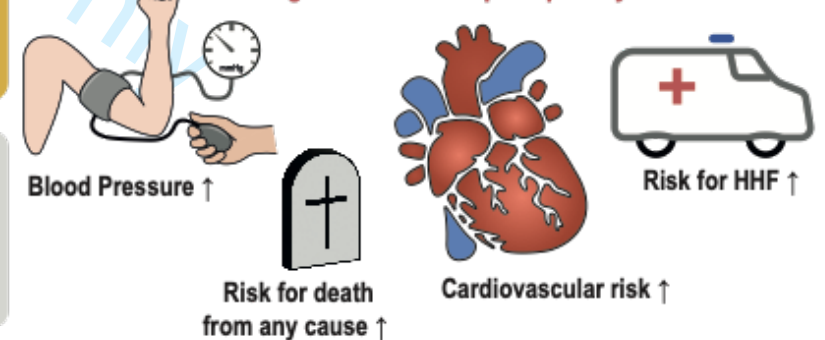



1  
2  
3 Supplement figure 3. Central illustration. BP= blood pressure; CV= cardiovascular; ET= effervescent tablets; HHF= hospitalization for acute heart  
4 failure; IQR= interquartile range; MDD= maximum daily dose; RDSI= recommended daily sodium intake.  
5  
6  
7  
8  
9  
10  
11  
12  
13  
14  
15  
16  
17  
18  
19  
20  
21  
22  
23  
24  
25  
26  
27  
28  
29  
30  
31  
32  
33  
34  
35  
36  
37  
38  
39  
40  
41  
42  
43  
44  
45  
46

For peer review only

# BMJ Open

## The hidden sodium in effervescent-tablet dietary supplements and over-the-counter drugs: a comparative cross-sectional study

|                                 |                                                                                                                                                                                                                                                                                                                                                                                                                                                                                                                                                                                                                                                                                                                                                                                                                                                                                                                                                                                                                                                                                                                                                                                                                                                                                                                                                                                                                                                                                                                                                                                |
|---------------------------------|--------------------------------------------------------------------------------------------------------------------------------------------------------------------------------------------------------------------------------------------------------------------------------------------------------------------------------------------------------------------------------------------------------------------------------------------------------------------------------------------------------------------------------------------------------------------------------------------------------------------------------------------------------------------------------------------------------------------------------------------------------------------------------------------------------------------------------------------------------------------------------------------------------------------------------------------------------------------------------------------------------------------------------------------------------------------------------------------------------------------------------------------------------------------------------------------------------------------------------------------------------------------------------------------------------------------------------------------------------------------------------------------------------------------------------------------------------------------------------------------------------------------------------------------------------------------------------|
| Journal:                        | <i>BMJ Open</i>                                                                                                                                                                                                                                                                                                                                                                                                                                                                                                                                                                                                                                                                                                                                                                                                                                                                                                                                                                                                                                                                                                                                                                                                                                                                                                                                                                                                                                                                                                                                                                |
| Manuscript ID                   | bmjopen-2023-076302.R2                                                                                                                                                                                                                                                                                                                                                                                                                                                                                                                                                                                                                                                                                                                                                                                                                                                                                                                                                                                                                                                                                                                                                                                                                                                                                                                                                                                                                                                                                                                                                         |
| Article Type:                   | Original research                                                                                                                                                                                                                                                                                                                                                                                                                                                                                                                                                                                                                                                                                                                                                                                                                                                                                                                                                                                                                                                                                                                                                                                                                                                                                                                                                                                                                                                                                                                                                              |
| Date Submitted by the Author:   | 12-Oct-2023                                                                                                                                                                                                                                                                                                                                                                                                                                                                                                                                                                                                                                                                                                                                                                                                                                                                                                                                                                                                                                                                                                                                                                                                                                                                                                                                                                                                                                                                                                                                                                    |
| Complete List of Authors:       | <p>Kunz , Michael; Universitätsklinikum des Saarlandes und Medizinische Fakultät der Universität des Saarlandes, Department of Internal Medicine III Cardiology, Angiology and Intensive Care Medicine<br/> Götzinger, Felix; Universitätsklinikum des Saarlandes und Medizinische Fakultät der Universität des Saarlandes, Department of Internal Medicine III Cardiology, Angiology and Intensive Care Medicine<br/> Jacobs, Cathy M.; Saarland University, Department of Experimental and Clinical Toxicology<br/> Lauder, Lucas; Universitätsklinikum des Saarlandes und Medizinische Fakultät der Universität des Saarlandes, Klinik für Innere Medizin IIII<br/> Ukena, Christian; Universitätsklinikum des Saarlandes und Medizinische Fakultät der Universität des Saarlandes, Department of Internal Medicine III Cardiology, Angiology and Intensive Care Medicine<br/> Meyer, Markus; Saarland University, Department of Experimental and Clinical Toxicology<br/> Laufs, Ulrich; University Hospital Leipzig, Cardiology<br/> Schulz, Martin; Free University of Berlin, Department of Pharmacology; German Institute for Drug Use Evaluation<br/> Böhm, Michael; Universitätsklinikum des Saarlandes und Medizinische Fakultät der Universität des Saarlandes, Department of Internal Medicine III Cardiology, Angiology and Intensive Care Medicine<br/> Mahfoud, Felix; Universitätsklinikum des Saarlandes und Medizinische Fakultät der Universität des Saarlandes, Department of Internal Medicine III Cardiology, Angiology and Intensive Care Medicine</p> |
| <b>Primary Subject Heading</b>: | Cardiovascular medicine                                                                                                                                                                                                                                                                                                                                                                                                                                                                                                                                                                                                                                                                                                                                                                                                                                                                                                                                                                                                                                                                                                                                                                                                                                                                                                                                                                                                                                                                                                                                                        |
| Secondary Subject Heading:      | Cardiovascular medicine                                                                                                                                                                                                                                                                                                                                                                                                                                                                                                                                                                                                                                                                                                                                                                                                                                                                                                                                                                                                                                                                                                                                                                                                                                                                                                                                                                                                                                                                                                                                                        |
| Keywords:                       | Hypertension < CARDIOLOGY, Heart failure < CARDIOLOGY, Cardiology < INTERNAL MEDICINE, PREVENTIVE MEDICINE                                                                                                                                                                                                                                                                                                                                                                                                                                                                                                                                                                                                                                                                                                                                                                                                                                                                                                                                                                                                                                                                                                                                                                                                                                                                                                                                                                                                                                                                     |
|                                 |                                                                                                                                                                                                                                                                                                                                                                                                                                                                                                                                                                                                                                                                                                                                                                                                                                                                                                                                                                                                                                                                                                                                                                                                                                                                                                                                                                                                                                                                                                                                                                                |

SCHOLARONE™  
Manuscripts

1  
2  
3  
4  
5  
6  
7  
8  
9  
10  
11  
12  
13  
14  
15  
16  
17  
18  
19  
20  
21  
22  
23  
24  
25  
26  
27  
28  
29  
30  
31  
32  
33  
34  
35  
36  
37  
38  
39  
40  
41  
42  
43  
44  
45  
46  
47  
48  
49  
50  
51  
52  
53  
54  
55  
56  
57  
58  
59  
60



I, the Submitting Author has the right to grant and does grant on behalf of all authors of the Work (as defined in the below author licence), an exclusive licence and/or a non-exclusive licence for contributions from authors who are: i) UK Crown employees; ii) where BMJ has agreed a CC-BY licence shall apply, and/or iii) in accordance with the terms applicable for US Federal Government officers or employees acting as part of their official duties; on a worldwide, perpetual, irrevocable, royalty-free basis to BMJ Publishing Group Ltd ("BMJ") its licensees and where the relevant Journal is co-owned by BMJ to the co-owners of the Journal, to publish the Work in this journal and any other BMJ products and to exploit all rights, as set out in our [licence](#).

The Submitting Author accepts and understands that any supply made under these terms is made by BMJ to the Submitting Author unless you are acting as an employee on behalf of your employer or a postgraduate student of an affiliated institution which is paying any applicable article publishing charge ("APC") for Open Access articles. Where the Submitting Author wishes to make the Work available on an Open Access basis (and intends to pay the relevant APC), the terms of reuse of such Open Access shall be governed by a Creative Commons licence – details of these licences and which [Creative Commons](#) licence will apply to this Work are set out in our licence referred to above.

Other than as permitted in any relevant BMJ Author's Self Archiving Policies, I confirm this Work has not been accepted for publication elsewhere, is not being considered for publication elsewhere and does not duplicate material already published. I confirm all authors consent to publication of this Work and authorise the granting of this licence.

# The hidden sodium in effervescent-tablet dietary supplements and over-the-counter drugs: a comparative cross-sectional study

Michael Kunz<sup>1</sup>, Felix Götzinger<sup>1</sup>, Cathy M. Jacobs<sup>2</sup>, Lucas Lauder<sup>1</sup>, Christian Ukena<sup>1</sup>, Markus R. Meyer<sup>2</sup>, Ulrich Laufs<sup>3</sup>, Martin Schulz<sup>4,5</sup>, Michael Böhm<sup>1</sup>, Felix Mahfoud<sup>1</sup>

1. Department of Internal Medicine III, Cardiology, Angiology and Intensive Care Medicine, University Hospital Saarland, Saarland University, 66424 Homburg, Germany

2. Department of Experimental and Clinical Toxicology, Institute of Experimental and Clinical Pharmacology and Toxicology, Center for Molecular Signaling (PZMS), Saarland University, 66424 Homburg, Germany

3. Klinik und Poliklinik für Kardiologie, Universitätsklinikum Leipzig, 04103 Leipzig, Germany

4. German Institute for Drug Use Evaluation (DAPI) e.V., 10557 Berlin, Germany

5. Institute of Pharmacy, Freie Universität Berlin, 12169, Berlin, Germany

## Correspondence to:

Dr. Michael Kunz, M.D.

Department for Internal Medicine III

Cardiology, Angiology, and Intensive Care Medicine

IMED, Geb. 41, Kirrberger Str. 1

Saarland University Hospital and Saarland University

66421 Homburg, Germany

Tel. +4968411615911; Fax +4968411615910

michael.kunz@uks.eu

## **Abstract**

**Objective:** Dietary sodium intake represents a risk factor for cardiovascular disease and mortality. The study sought to analyse the sodium content of effervescent dietary supplements and drugs in Germany and the USA.

**Design:** Comparative cross-sectional study.

**Setting and methods:** The sodium content of 39 dietary supplement effervescent tablets available in Germany was measured in May and June 2022 using optical emission spectrometry with inductively coupled argon plasma. The sodium content of 33 common pharmacy-only effervescent tablets (over-the-counter [OTC] drugs) in Germany was obtained from the summary of product characteristics. We compared the sodium content of the measured German dietary supplement effervescent tablets to that of 51 dietary supplement effervescent tablets available in the USA (data: National Institutes of Health's Dietary Supplement Label Database).

**Results:** The measured sodium content in the German dietary supplements was  $283.9 \pm 122.6$  mg sodium/tablet, equivalent to  $14 \pm 6\%$  of the maximum recommended daily sodium intake (MRDSI). Vitamin products had the highest ( $378.3 \pm 112.8$  mg,  $19 \pm 6\%$  of MRDSI), and calcium products had the lowest mean sodium content ( $170.4 \pm 113.2$  mg,  $9 \pm 6\%$  of MRDSI). Vitamin products contained significantly more sodium than magnesium ( $378.3$  mg vs.  $232.7$  mg;  $p=0.004$ ), calcium ( $378.3$  mg vs.  $170.4$  mg;  $p=0.006$ ), and mineral products ( $378.3$  mg vs.  $191.6$  mg;  $p=0.048$ ). The sodium content measured in products available in Germany was higher when compared to the declared sodium content on the label of the products sold in the USA ( $283.9$  mg vs.  $190.0$  mg;  $p<0.001$ ). The median summary of product characteristics-declared sodium content of a single dose of the German OTC drugs was  $157.0$  mg (interquartile range (IQR):  $98.9$ - $417.3$  mg); pain/common cold drugs contained the most sodium (median:  $452.1$  mg; IQR:  $351.3$ - $474.0$  mg).

1  
2  
3 **Conclusion:** Effervescent tablets of nutritional supplements and OTC drugs contain high  
4  
5 amounts of sodium, which often is not disclosed.  
6  
7  
8  
9

10  
11  
12 **Keywords:**  
13

14 sodium, dietary supplement, effervescent tablets, over-the-counter drugs, salt, cardiovascular  
15  
16 risk, hypertension, heart failure  
17  
18  
19  
20  
21  
22

23 **Strengths and limitations of this study**  
24

- 25  
26  
27  
28  
29  
30  
31  
32  
33  
34  
35  
36  
37  
38  
39  
40  
41  
42  
43  
44  
45  
46  
47  
48  
49  
50  
51  
52  
53  
54  
55  
56  
57  
58  
59  
60
- The measurement of sodium content in dietary supplement and pharmacy-only effervescent tablets gives detailed insights into the quantities of hidden sodium in these dosage forms.
  - We provide sales figures for effervescent tablets sold in German pharmacies.
  - However, data for the quantities sold of dietary supplement effervescent tablets from discounters, grocery stores and drugstores are not publicly available.
  - The association between the ingestion of effervescent tablets and cardiovascular outcomes was not investigated.

## **Introduction**

Dietary sodium intake is associated with elevated blood pressure (BP), increased cardiovascular events including stroke and death from any cause.[1–5] In patients with arterial hypertension, the long-term reduction of 1,800 mg less sodium/day (this corresponds to 4,600 mg table salt/day) was associated with a reduction in systolic/diastolic BP of 5.1/2.7 mmHg.[4] The extent of the sodium restriction was proportional to the reduction in BP, with a more pronounced effect in patients with hypertension.[6] Even modest reductions in dietary sodium have been shown to reduce cardiovascular events, including myocardial infarction and stroke.[1,7] Dietary sodium consumption is an important risk factor for premature death and disability-adjusted life-years globally.[7] The World Health Organization (WHO) recommends reducing sodium intake to <2,000 mg/day in adults, which is equivalent to 5,000 mg of table salt (sodium chloride).[8] However, only a small proportion of the population achieves this goal.[9] The daily amount of table salt consumed is often much higher (9,000-12,000 mg/day; 3,500-7,700 mg sodium/day), which may, in part, relate to hidden sodium consumption.[9,10]

Effervescent tablets often contain a relatively high amount of sodium in form of sodium bicarbonate, sodium carbonate, or sodium citrate and are frequently consumed without awareness of their sodium content.[11,12] This may be particularly relevant for dietary supplements and over-the-counter (OTC) effervescent tablets (e.g., vitamin C, magnesium, or analgesics) from groceries, drugstores, discounter, and pharmacies because many manufacturers do not provide information on sodium content on the label. The present study sought to provide information about the often not labelled sodium content of dietary supplement effervescent tablets from large groceries- and drugstores and sodium-containing effervescent tablets used as drugs from pharmacies. Country-specific differences in sodium content (products from Germany vs. products from the USA) were set forth.



## **Methods**

### *Study design*

A comparative cross-sectional study was conducted in 2022 and 2023 to examine and compare the sodium content of different categories of effervescent tablets.

### *Classification, place of purchase and analyses of dietary supplements available in Germany*

The sodium content of 39 different dietary supplement effervescent tablets available in Germany (divided into the categories vitamins, magnesium, calcium, minerals, and other products) from 11 manufacturers and five distributors was analysed in May and June 2022. The effervescent tablets were divided into categories based on the main active ingredient (e.g., if a product mainly contains magnesium and only a little calcium related to the recommended daily dose, then it is assigned to the category magnesium). The products were purchased from two discounters (ALDI SÜD GmbH & Co. and Netto Marken-Discount Stiftung & Co. KG), one grocery store (Edeka Stiftung & Co. KG), and two drugstores (DM drogerie markt GmbH & Co. KG and Müller Handels GmbH & Co. KG) in Germany and then delivered to the laboratory unopened.

The analyses were performed by an accredited chemical laboratory in Germany (CBA GmbH, Kirkel-Limbach, Germany, Deutsche Akkreditierungsstelle D-PL-14360-01-00). After appropriate standardized sample preparation, optical emission spectrometry with inductively coupled argon plasma (ICP-OES) was used for analysis. The sample preparation (pressure digestion in Teflon-pressure-vessels with microwave-assisted heating) proceeded as follows. The effervescent tablets were ground up and a sample amount corresponding to the expected sodium content was weighed out exactly. This amount of powder was displaced firstly with 1 mL water and then with 3 mL 65% nitric acid and transferred to the Teflon-pressure-vessel. The digestion took place at 180° Celsius in the digestion apparatus (microwave digestion

1  
2  
3 system, CEM) for at least 20 minutes, followed by a cooling period. The vessels were filled up  
4  
5 with water again to the nominal volume. Reference solutions and blank values were treated in  
6  
7 the same way. After sample preparation, the solutions were transferred directly into the ICP-  
8  
9 OES equipment (ICP-OES iCAP 6300 Duo, Thermo-Fisher Scientific). All digestion and  
10  
11 reference solutions were sprayed into an argon plasma, followed by selective detection of  
12  
13 sodium emission radiation at 589.59 nm.  
14  
15

### 16 17 *Classification and data source for over-the-counter drugs*

18  
19  
20 The sodium content of 33 commonly sold pharmacy-only effervescent tablets (30 OTC and three  
21  
22 prescription drugs, all referred to as “OTC drugs” for convenience) from German pharmacies  
23  
24 was derived from the respective package inserts or summary of product characteristics. The  
25  
26 drugs were divided into the categories pain/common cold, cough, calcium/vitamin D, and other  
27  
28 drugs based on the main active ingredient. The analysis was based on data from the German  
29  
30 Institute for Drug Use Evaluation (Deutsches Arzneiprüfungsinstitut e.V. (DAPI)). This  
31  
32 database contains anonymized dispensing data from more than 95% of the community  
33  
34 pharmacies in all 16 German federal states, claimed at the expense of the statutory health  
35  
36 insurance (SHI) funds, and a DataWare House to identify every product by a specific code  
37  
38 (“Pharmazentralnummer”, PZN). The SHI system, consisting of nearly 100 funds, covers 88%  
39  
40 of the population i.e., approximately 73.3 million people. As the unit for prescribed drugs, we  
41  
42 used defined daily doses (DDD) – that is, the assumed average maintenance dose per day for a  
43  
44 drug used for its main indication in adults. Further, we analysed the aggregate amount of  
45  
46 dispensed packages of drugs and diet supplements as effervescent tablets in community  
47  
48 pharmacies and via mail-order using dispensing data reimbursed by SHI funds as well as private  
49  
50 health insurance companies and over-the-counter sales from the INSIGHT Health  
51  
52 (<https://www.insight-health.de/>) and DatamedIQ (<https://www.datamediq.com/>) databases,  
53  
54 respectively. Usual package sizes of pain/common cold and cough effervescent tablets are 10  
55  
56  
57  
58  
59  
60

1  
2  
3 or 20, of calcium/vitamin D 20, 40, or 100 tablets. The sodium content of the maximum  
4 recommended daily dose was also specified and confirmed by the data in the package insert  
5  
6 and/or summary of products characteristics.  
7  
8  
9

### 10 *Classification and data source of dietary supplements available in the USA*

11  
12  
13  
14 The sodium content of 51 dietary supplement effervescent tablets available in the USA was  
15 derived in May 2023 from the Dietary Supplement Label Database. The National Institutes of  
16 Health's Dietary Supplement Label Database includes 156,957 current and historical label  
17 information from products marketed in the US. Effervescent tablets with specified sodium  
18 content in the product information were included. The products were divided into the following  
19 categories based on the main active ingredient: vitamin, mineral, energy, and other products.  
20  
21  
22  
23  
24  
25  
26  
27

### 28 *Statistical methods*

29  
30  
31  
32 The data are presented as means  $\pm$  standard deviation (SD), medians and interquartile ranges  
33 (IQR), or numbers (%). Normal distribution was tested using Kolmogorov-Smirnov/ Shapiro-  
34 Wilk test and using a histogram. Analysis of variance (ANOVA) was used (after tested for all  
35 assumptions for ANOVA: normally distribution, independence of cases, homogeneity of  
36 variance) for comparisons of normally distributed parameters, and for comparisons between  
37 non-normally distributed parameters, the Kruskal-Wallis test was used. If these tests were  
38 significant, we used a post hoc method (Dunn-Bonferroni) for pairwise comparisons. For  
39 comparisons between two non-normally distributed parameters, the Mann-Whitney-U-test was  
40 used. A two-sided p-value  $<0.05$  was considered statistically significant. Statistical analyses  
41 were performed with SPSS (version 27.0.1.0).  
42  
43  
44  
45  
46  
47  
48  
49  
50  
51  
52  
53

### 54 *Patient and public involvement*

55  
56  
57  
58  
59 None.  
60

## **Results**

### *Dietary supplement effervescent tablets in Germany*

Supplemental table 1 provides an overview of the included dietary supplement effervescent tablets available in Germany. The median weight of one tablet was 5.5 g, and the price ranged from 2.3 to 39.9 EUR cents/tablet (median price/tablet: 3.2 EUR cents). The sodium content of the effervescent tablets measured by ICP-OES is listed in table 1. On average, one effervescent tablet contained  $283.9 \pm 122.6$  mg sodium (table 2 A). Vitamin products had the highest ( $378.3 \pm 112.8$  mg) and calcium products ( $170.4 \pm 113.2$  mg) the lowest mean sodium content. Vitamin products contained significantly more sodium than magnesium ( $p=0.004$ ), calcium ( $p=0.006$ ), and mineral ( $p=0.048$ ) products (figure 1). Based on the recommended maximum intake of 2,000 mg sodium/day, a single effervescent tablet contained as much as 4-28% of the maximum recommended daily sodium intake. The lowest sodium content/effervescent tablet was 76 mg (Magnesium400®, Fit + Vital), and the highest was 564.7 mg (VitaminC1000®, Fit + Vital). The median sodium content was 5.1 g/100 g effervescent tablets, with the highest being 9.63 g sodium/100 g (Eisen + Vitamin C®, Fit + Vital). Supplement figure 1 depicts the number of effervescent tablets according to sodium content (in 100 mg increments) grouped per category. One of ten (10.3%) products contained more than 500 mg sodium/tablet. Only 5 (12.8%) products (all of the Mivolis brand) declared the sodium content on the packaging which was nearly identical to the measured sodium content.

### *Dietary supplement effervescent tablets in the USA*

The sodium content of the various effervescent tablets is listed in Supplemental table 2. Among all screened products ( $n=981$ ), only few declared the sodium content on the label (5.2%), allowing 51 products to be included. The median sodium content of a single effervescent tablet

1  
2  
3 was 190.0 mg (IQR: 100-250 mg; table 2 B) and no difference in sodium content between the  
4  
5 various categories was found ( $p=0.061$ ). A single effervescent tablet contained 2-18% of the  
6  
7 maximum recommended daily sodium content. The measured sodium content of dietary  
8  
9 supplements available in Germany was higher when compared with the declared sodium  
10  
11 content of products available in the USA ( $p<0.001$ ).  
12  
13  
14

### 15 *Pharmacy-only effervescent tablets*

16  
17  
18 The sodium content declared on the summary of product characteristics of the OTC drugs sold  
19  
20 in Germany is listed in table 3. The median reported sodium content of a single effervescent  
21  
22 tablet was 157.0 mg (IQR: 98.9-417.3 mg; table 2 C). The percentage of sodium consumed per  
23  
24 effervescent tablet in relation to the maximum recommended daily sodium intake ranged from  
25  
26 3-29%. Pain/common cold drugs had the highest median sodium content (452.1 mg; IQR:  
27  
28 351.3-474.0 mg) and calcium/vitamin D drugs the lowest (87.0 mg; IQR: 52.0-103.0 mg). A  
29  
30 single pain/common cold effervescent tablet contained significantly more sodium than one  
31  
32 calcium/vitamin D effervescent tablet ( $p<0.0001$ ). Supplement figure 2 depicts the number of  
33  
34 effervescent tablets according to sodium content (in 100 mg increments) grouped per category.  
35  
36 The median sodium content of the recommended daily dose of all included drugs was 384.0 mg  
37  
38 (IQR: 139.0-1295.5 mg; table 2 D) and for pain/common cold drugs 2,776.5 mg (IQR: 1,299.8-  
39  
40 3,333.0 mg), representing 19%/139% of maximum recommended daily sodium intake,  
41  
42 respectively. The intake of eight tablets (maximum recommended daily dose) of Alka-Seltzer  
43  
44 classic® (aspirin, Bayer) would lead to the ingestion of 3,560 mg sodium (figure 2), which  
45  
46 encompasses 178% of the maximum recommended daily sodium intake. The sodium content  
47  
48 of the maximum daily dose of pain/common cold drugs was significantly higher than the  
49  
50 sodium content of the maximum daily dose of calcium/vitamin D drugs ( $p<0.0001$ ) and cough  
51  
52 drugs ( $p=0.007$ ). No significant difference in sodium content between the dietary supplement  
53  
54  
55  
56  
57  
58  
59  
60

1  
2  
3 calcium effervescent tablets and the pharmacy-only calcium/vitamin D effervescent tablets was  
4  
5 seen (p=0.109).  
6  
7

8 Supplement figure 3 summarizes the main results.  
9

## 10 11 12 13 14 **Discussion**

15  
16  
17 This study assessed the sodium content of nutritional supplement effervescent tablets available  
18 in Germany and found the sodium amount to range from 76.0 mg/tablet to 564.7 mg/tablet  
19 (average 283.9 mg/tablet) representing up to 28% of the maximum recommended daily sodium  
20 intake. Vitamin products contained more sodium than magnesium, calcium, and mineral  
21 products. The sodium amount/tablet of OTC drugs ranged from 52 mg to 575 mg (median 157.0  
22 mg) representing up to 29% of the maximum recommended daily sodium intake. The intake of  
23 the recommended daily dose of one OTC drug would lead to a median consumption of 384.0  
24 mg sodium, and as high as 2,776.5 mg for pain/common cold drugs. The major differences in  
25 the product classes' sodium contents are probably due to the variable CO<sub>2</sub>-dependent  
26 solubilities. More sodium bicarbonate and/or sodium citrate is required for poorly soluble active  
27 ingredients in effervescent tablets for them to dissolve quickly and completely in water. The  
28 large variations within individual product classes remain unexplained. Products available in the  
29 USA also contain a relevant amount of sodium (ranging from 40 to 360 mg/tablet). Of note,  
30 dietary supplement effervescent tablets available in Germany contained more measured sodium  
31 than that declared in those available in the USA. This may, in part, be related to selection bias  
32 since only a few manufactures from the USA voluntarily provide information about the sodium  
33 content.  
34  
35  
36  
37  
38  
39  
40  
41  
42  
43  
44  
45  
46  
47  
48  
49  
50  
51  
52  
53  
54  
55  
56  
57  
58  
59  
60

Dietary sodium intake has been linked to serious harmful effects, including BP elevation and  
all-cause death.[1,3,4,13,14] The 2017 report of the Global Burden of Disease study listed

1  
2  
3 excess sodium intake among the major dietary risks, estimated to cause 3 million deaths every  
4 year worldwide.[7] A recently published, randomized trial in 20,995 subjects showed that using  
5 a table salt substitute containing 75% sodium chloride and 25% potassium chloride (as opposed  
6 to regular table salt containing 100% sodium chloride) reduced stroke, cardiovascular events,  
7 and death.[1] Consequently, the WHO recommends that daily sodium intake should not exceed  
8 2,000 mg.[8] Many national and international societies have advocated for actions to lower  
9 dietary sodium intake through public education, labelling of foods, and improved formulations  
10 of convenience food. Nonetheless, the daily sodium intake around the world is often much  
11 higher (9,000-12,000 mg table salt/day; 3,500-7,700 mg sodium/day), which may, in part, be  
12 aggravated by hidden sodium consumption.[10,15]

13  
14  
15 For improved and quick solubility, effervescent tablets contain often high amounts of  
16 sodium[11] as sodium bicarbonate, sodium carbonate, and/or sodium citrate. The impact of  
17 sodium-containing effervescent, mainly paracetamol (acetaminophen) tablets on BP, acute  
18 heart failure events, and cardiovascular risk was investigated in several studies.[16–19] The  
19 intake of effervescent paracetamol tablets (with 545 mg sodium/dose) was shown to increase  
20 24-hour systolic BP by 5.0 mmHg.[17] Other trials showed an association between the intake  
21 of sodium-containing effervescent paracetamol tablets (390-440 mg of sodium/tablet) and an  
22 increased risk of hospitalization for heart failure[18], cardiovascular risk, and all-cause  
23 mortality among patients with and without hypertension.[11,16,19] The mechanism by which  
24 the active substance paracetamol increases blood pressure has not been conclusively clarified;  
25 inter alia an influence on the cyclooxygenase pathway is discussed.[20,21] Nevertheless,  
26 sodium containing paracetamol effervescent tablets deteriorate blood pressure control mainly  
27 caused by the sodium in the effervescent tablets, as evident by the fact that after switching from  
28 paracetamol effervescent tablets to paracetamol tablets (without sodium), a decrease in blood  
29 pressure was observed.[22]



1  
2  
3 This provides evidence that effervescent tablets increase sodium intake which might be  
4 associated with an increased risk for cardiovascular diseases.[1,3,4,13,14] A large case-control  
5 study comprising 1,292,337 patients with a mean follow-up of 7.2 years investigated the  
6 association between cardiovascular events and sodium-containing effervescent, dispersible, and  
7 soluble drugs.[19] Participants were prescribed sodium-containing formulations or matched  
8 standard formulations of the same drug. A total of 61,072 patients with a cardiovascular event  
9 were matched with controls. The sodium-containing substances were largely painkillers or  
10 calcium drugs with a wide range of sodium content (4.6-427.8 mg/tablet).[19] The adjusted  
11 odds ratio for exposure to sodium-containing drugs were 1.16 (95%-confidence interval (95%-  
12 CI: 1.12-1.21) for the composite of myocardial infarction, stroke, or vascular death, 1.28 (95%-  
13 CI: 1.23-1.33) for all-cause mortality, and 7.18 (95%-CI: 6.74-7.65) for hypertension.[19] Of  
14 note, the sodium content of some of the included effervescent tablets in this study is comparable  
15 with the sodium content of the drugs included in the mentioned study.[19]

16  
17  
18  
19  
20  
21  
22  
23  
24  
25  
26  
27  
28  
29  
30  
31  
32  
33  
34 The ancillary sodium intake through effervescent tablets is often neglected or unknown. Herein,  
35 the average sodium content of effervescent food supplements tablets in Germany was 283.9  
36 mg/tablet, and the median sodium content of the pharmacy-only effervescent tablets was 157.0  
37 mg/tablet. Consuming one of the included effervescent vitamin tablets or pain/common cold  
38 tablets corresponds to about one fifth (19%/23%) of the maximum recommended daily sodium  
39 intake. Six products (8.3%) contained more than 500 mg sodium/tablet. Vitamin products  
40 contained significantly more sodium than magnesium ( $p=0.004$ ), calcium ( $p=0.006$ ) and  
41 mineral ( $p=0.048$ ) products; this might be due to different solubility properties. The sodium  
42 content of the maximum daily dose of pain/common cold drugs was significantly higher than  
43 the sodium content of the maximum daily dose of calcium/vitamin D drugs ( $p<0.0001$ ) and  
44 cough drugs ( $p=0.007$ ). Yet, the majority of the general population and healthcare professionals  
45 alike are unaware of the high sodium content of effervescent tablets.[11]



1  
2  
3 A relevant proportion of the population regularly consumes effervescent tablets as a dietary  
4 supplement and/or drugs.[12] In a cross-sectional study from France including 1,043 healthy  
5 individuals, 26.9% of the participants reported regular intake of effervescent tablets (once in  
6 the last 30 days) and 7.3% reported intake of two or more effervescent tablets/week during the  
7 last 30 days.[12] A vast majority of 93.8% of these effervescent tablets were OTC drugs and  
8 nutritional supplements, such as vitamins.[12] The presence of hypertension, which should  
9 require table salt/sodium restriction, did not result in a reduced intake of effervescent  
10 tablets.[12]  
11  
12  
13  
14  
15  
16  
17  
18  
19  
20  
21

22 According to the Federal Statistical Office of Germany (Statistisches Bundesamt, Destatis), the  
23 production of dietary supplements in 2020, which include effervescent tablets, increased by  
24 11% compared with the previous year, most likely as a consequence of the COVID-19  
25 pandemic. In 2020, 180,200 tons of dietary supplements were produced with a value of 1.1  
26 billion Euros in Germany, which corresponds to an increase of 23.4%. In Germany, the sodium  
27 content must be indicated on the medicinal products sold in pharmacies but is not mandatory  
28 on dietary supplements sold in drugstores or supermarkets.[23,24] Only five (13%) of the  
29 included dietary supplements available in Germany and only 5.2% of the investigated dietary  
30 supplements available in the US declared sodium content on the packaging, hence, consumers  
31 are frequently not informed.  
32  
33  
34  
35  
36  
37  
38  
39  
40  
41  
42  
43  
44  
45

46 Various sodium-containing drugs administered as effervescent tablets are available. In German  
47 pharmacies alone, 3.96 million packages of the included pain/common cold and 5.30 million  
48 packs of the included cough effervescent tablets were sold in 2021. ([https://www.insight-](https://www.insight-health.de/)  
49 [health.de/](https://www.datamediq.com/) and <https://www.datamediq.com/>) A total of 52.32 million DDD of calcium/vitamin  
50 D drugs, mainly as effervescent tablets, were claimed by community pharmacies at the expense  
51 of the SHI funds alone in Germany in 2021.[25] Based on these high sales, we assume that a  
52 relevant proportion of the population, occasionally or regularly, consumes effervescent tablets.  
53  
54  
55  
56  
57  
58  
59  
60

1  
2  
3 A dietary reduction of 1,200 mg sodium/day could translate into an annual reduction of 60,000-  
4  
5 120,000 new coronary heart disease patients, 32,000-66,000 fewer strokes, and 54,000-99,000  
6  
7 fewer myocardial infarctions in the USA.[13] This amount of sodium is already contained in  
8  
9 approximately 3 of the included effervescent vitamin tablets available in Germany (378.3 mg  
10  
11 sodium/tablet on average). A modelling study from China showed that a reduction of 1,000 mg  
12  
13 table salt/day could prevent approximately 9 million cardiovascular events in China by 2030,  
14  
15 of which approximately 4 million are fatal.[26] Of note, a total of 1,000 mg table salt contains  
16  
17 approximately 394 mg sodium. This amount of sodium approximately corresponds to the  
18  
19 sodium content of one of the examined vitamin or pain/common cold effervescent tablets.  
20  
21  
22

23  
24 The intake of one sodium containing dietary supplement effervescent tablet per day for the  
25  
26 whole year increases cardiovascular risk more likely than several pain/common cold  
27  
28 effervescent tablets/day taken for 5-7 days only. A typical common cold lasts approximately  
29  
30 5-7 days, so the duration of the medical therapy is limited and the intake of OTC-effervescent  
31  
32 tablets is rarely permanent. However, studies investigating the (temporary) intake of sodium-  
33  
34 containing acetaminophen (paracetamol) effervescent tablets showed an increased risk for  
35  
36 hospitalization for acute heart failure, cardiovascular disease and all-cause mortality.[16,18].  
37  
38 The effect of permanent intake of sodium containing dietary supplement effervescent tablet  
39  
40 could therefore be higher.  
41  
42  
43  
44  
45

46 The benefits of pharmacotherapy should always outweigh the risks/side effects. Most likely,  
47  
48 the majority of the general population is unaware of the sodium content of effervescent tablets  
49  
50 and dietary supplements are often regarded as “sweets”. Dietary supplements are considered  
51  
52 “foods” by regulators and health benefits of many dietary supplements for healthy,  
53  
54 asymptomatic and well-nourished adults have not yet been demonstrated in randomized clinical  
55  
56 trials.[27,28]. Consequently, the harm might outweigh the benefit when people ingest several  
57  
58 vitamin and electrolyte effervescent tablets daily, assuming they are doing something good for  
59  
60

1  
2  
3 their health. In addition, there is little reason to prescribe effervescent tablets because most  
4  
5 active ingredients are also available as tablets not containing sodium.  
6  
7

### 8 *Limitations*

9

10  
11 Some limitations of our study should be considered. This study provides relevant insights into  
12  
13 the sodium content in dietary supplemental and pharmacy-only effervescent tablets but does  
14  
15 not assess the association between the ingestion of these products and cardiovascular outcomes.  
16  
17 Therefore, only assumptions can be made. Nevertheless, the included effervescent tablets  
18  
19 contained a relevant amount of sodium comparable to prior studies investigating the association  
20  
21 between sodium-containing effervescent tablets and cardiovascular risk. We provide sales  
22  
23 figures for effervescent tablets sold in pharmacies. The quantity of dietary supplement  
24  
25 effervescent tablets from discounters, grocery- and drugstores is not publicly available.  
26  
27 Measured (Germany) sodium contents of dietary supplements were compared with declared  
28  
29 (USA). Assuming the manufacture declares the correct sodium content on the packing, the  
30  
31 detection of national differences is possible. Nevertheless, the assumption that the declared  
32  
33 sodium content of dietary supplements available in the USA are valid, is a limitation. It is not  
34  
35 guaranteed that the ingredients declared on the packing are “correct”. [29–31]  
36  
37  
38  
39  
40

### 41 **Conclusion**

42

43  
44 Dietary supplements and OTC effervescent tablets investigated herein contained high sodium.  
45  
46 Some products contain more sodium than others, although comparable in (active) ingredients.  
47  
48 As the variability between preparations is high and these amounts of additional sodium intake  
49  
50 may contribute to poor BP control and cardiovascular events, including hospitalization for acute  
51  
52 heart failure and death, we think regulators should demand a front-package labelling of sodium  
53  
54 content and associated risk before market access. Based on the study findings, patients at risk  
55  
56 should be advised to limit effervescent tablets to prevent the ingestion of hidden sodium, and  
57  
58  
59  
60

1  
2  
3 to select non-effervescent alternatives containing the same active ingredients. Finally, we  
4 suggest that manufacturers should be prompted to reduce sodium in their effervescent  
5 formulations.  
6  
7  
8  
9  
10  
11  
12  
13

#### 14 **Funding**

15  
16  
17 None.  
18  
19

#### 20 **Competing interests**

21  
22  
23 Michael Böhm is supported by the Deutsche Forschungsgemeinschaft (German Research  
24 Foundation; TTR 219, project number 322900939) and reports personal fees from Abbott,  
25 Amgen, Astra Zeneca, Bayer, Boehringer-Ingelheim, Cytokinetic, Edwards, Medtronic,  
26 Novartis, ReCor Medical, Servier and Vifor. Felix Mahfoud is supported by Deutsche  
27 Gesellschaft für Kardiologie (DGK), Deutsche Forschungsgemeinschaft (SFB TRR219), and  
28 Deutsche Herzstiftung and has received scientific support and/or speaker honoraria from Astra  
29 Zeneca, Bayer, Boehringer Ingelheim, Medtronic, Merck, and ReCor Medical. Lucas Lauder  
30 has received speaker honoraria from ReCor Medical and Medtronic. Christian Ukena has  
31 received lecture honoraria or consulting fees from Bayer, Bristol Myers Squibb, Medtronic and  
32 ReCor Medical. Ulrich Laufs has received speaker honoraria from Amgen, Daiichi Sankyo,  
33 Novartis, and Sanofi, all outside the submitted work. Martin Schulz has received speaker  
34 honoraria from BMS, Daiichi Sankyo, DGK-Academy, Pfizer, and Sanofi and consulting fees  
35 from CSL Vifor, MSD and Novartis, all outside the submitted work. Felix Götzinger is  
36 supported by German Foundation for Heart Research (Deutsche Herzstiftung) and has received  
37 speaker honoraria from Astra Zeneca. The other authors do not have conflicts of interest.  
38  
39  
40  
41  
42  
43  
44  
45  
46  
47  
48  
49  
50  
51  
52  
53  
54  
55  
56  
57  
58  
59  
60

#### **Contributors**

1  
2  
3 Concept and design: Kunz, Götzinger, Schulz, Mahfoud. Acquisition, analysis, or interpretation  
4 of data: Kunz, Götzinger, Jacobs, Schulz, Mahfoud. Drafting of the manuscript: Kunz, Schulz,  
5 Mahfoud. Critical revision of the manuscript for important intellectual content: Jacobs, Lauder,  
6 Ukena, Meyer, Laufs, Schulz, Böhm, Mahfoud. Statistical analysis: Kunz, Lauder.  
7  
8 Supervision: Böhm, Mahfoud. The corresponding author attests that all listed authors meet  
9 authorship criteria and that no others meeting the criteria have been omitted.  
10  
11  
12  
13  
14  
15  
16  
17  
18

### 19 **Statement**

20  
21 The Corresponding Author has the right to grant on behalf of all authors and does grant on  
22 behalf of all authors, an exclusive licence (or non exclusive for government employees) on a  
23 worldwide basis to the BMJ Publishing Group Ltd to permit this article (if accepted) to be  
24 published in BMJ editions and any other BMJ PGL products and sublicences such use and  
25 exploit all subsidiary rights, as set out in our licence.  
26  
27  
28  
29  
30  
31  
32  
33  
34

### 35 **Ethical approval**

36 Not applicable.  
37  
38  
39  
40  
41  
42

### 43 **Data availability statement**

44  
45 All data relevant to the study are included in the article or uploaded as supplementary  
46 information. No additional data available.  
47  
48  
49  
50  
51  
52  
53

### 54 **References**

- 55  
56  
57  
58 1 Neal B, Wu Y, Feng X, *et al*. Effect of Salt Substitution on Cardiovascular Events and  
59 Death. *N Engl J Med* 2021;**385**:1067–77. doi:10.1056/NEJMoa2105675  
60

- 1  
2  
3 2 He FJ, Tan M, Ma Y, *et al.* Salt Reduction to Prevent Hypertension and Cardiovascular  
4 Disease. *J Am Coll Cardiol* 2020;**75**:632–47. doi:10.1016/j.jacc.2019.11.055  
5  
6  
7  
8  
9 3 Taylor RS, Ashton KE, Moxham T, *et al.* Reduced Dietary Salt for the Prevention of  
10 Cardiovascular Disease: A Meta-Analysis of Randomized Controlled Trials (Cochrane  
11 Review). *Am J Hypertens* 2011;**24**:843–53. doi:10.1038/ajh.2011.115  
12  
13  
14  
15  
16 4 He FJ, Li J, MacGregor GA. Effect of longer-term modest salt reduction on blood  
17 pressure. *Cochrane Database Syst Rev* 2013;**2013**.  
18 doi:10.1002/14651858.CD004937.pub2  
19  
20  
21  
22  
23  
24 5 He FJ, MacGregor GA. Role of salt intake in prevention of cardiovascular disease:  
25 controversies and challenges. *Nat Rev Cardiol* 2018;**15**:371–7. doi:10.1038/s41569-018-  
26 0004-1  
27  
28  
29  
30  
31  
32 6 Huang L, Trieu K, Yoshimura S, *et al.* Effect of dose and duration of reduction in dietary  
33 sodium on blood pressure levels: systematic review and meta-analysis of randomised  
34 trials. *BMJ* 2020;**368**:m315. doi:10.1136/bmj.m315  
35  
36  
37  
38  
39  
40 7 Afshin A, Sur PJ, Fay KA, *et al.* Health effects of dietary risks in 195 countries, 1990–  
41 2017: a systematic analysis for the Global Burden of Disease Study 2017. *Lancet*  
42 2019;**393**:1958–72. doi:10.1016/S0140-6736(19)30041-8  
43  
44  
45  
46  
47 8 World Health Organization. Guideline: Sodium intake for adults and children. *World*  
48 *Heal Organ* 2012.  
49  
50  
51  
52  
53 9 Powles J, Fahimi S, Micha R, *et al.* Global, regional and national sodium intakes in 1990  
54 and 2010: a systematic analysis of 24 h urinary sodium excretion and dietary surveys  
55 worldwide. *BMJ Open* 2013;**3**:e003733. doi:10.1136/bmjopen-2013-003733  
56  
57  
58  
59  
60 10 He FJ, Burnier M, MacGregor GA. Nutrition in cardiovascular disease: salt in

- 1  
2  
3 hypertension and heart failure. *Eur Heart J* 2011;**32**:3073–80.  
4  
5 doi:10.1093/eurheartj/ehr194  
6  
7  
8  
9 11 Schutte AE, Neal B. The sodium hidden in medication: a tough pill to swallow. *Eur*  
10  
11 *Heart J* 2022;**43**:1756–8. doi:10.1093/eurheartj/ehab888  
12  
13  
14 12 Perrin G, Berdot S, Thomas F, *et al.* Evaluation of exposure to effervescent drugs in a  
15  
16 large health check-up population in France: a cross-sectional study. *BMJ Open*  
17  
18 2018;**8**:e022368. doi:10.1136/bmjopen-2018-022368  
19  
20  
21  
22 13 Bibbins-Domingo K, Chertow GM, Coxson PG, *et al.* Projected Effect of Dietary Salt  
23  
24 Reductions on Future Cardiovascular Disease. *N Engl J Med* 2010;**362**:590–9.  
25  
26 doi:10.1056/NEJMoa0907355  
27  
28  
29  
30 14 He FJ, MacGregor GA. Salt reduction lowers cardiovascular risk: meta-analysis of  
31  
32 outcome trials. *Lancet* 2011;**378**:380–2. doi:10.1016/S0140-6736(11)61174-4  
33  
34  
35  
36 15 Brown IJ, Tzoulaki I, Candeias V, *et al.* Salt intakes around the world: implications for  
37  
38 public health. *Int J Epidemiol* 2009;**38**:791–813. doi:10.1093/ije/dyp139  
39  
40  
41  
42 16 Zeng C, Rosenberg L, Li X, *et al.* Sodium-containing acetaminophen and cardiovascular  
43  
44 outcomes in individuals with and without hypertension. *Eur Heart J* 2022;**43**:1743–55.  
45  
46 doi:10.1093/eurheartj/ehac059  
47  
48  
49  
50 17 Benitez-Camps M, Morros Padrós R, Pera-Pujadas H, *et al.* Effect of effervescent  
51  
52 paracetamol on blood pressure. *J Hypertens* 2018;**36**:1656–62.  
53  
54 doi:10.1097/HJH.0000000000001733  
55  
56  
57  
58 18 Perrin G, Arnoux A, Berdot S, *et al.* Association Between Exposure to Effervescent  
59  
60 Paracetamol and Hospitalization for Acute Heart Failure: A Case-Crossover Study. *J*  
*Clin Pharmacol* Published Online First: 19 February 2022. doi:10.1002/jcph.2027

- 1  
2  
3 19 George J, Majeed W, Mackenzie IS, *et al.* Association between cardiovascular events  
4 and sodium-containing effervescent, dispersible, and soluble drugs: nested case-control  
5 study. *BMJ* 2013;**347**:f6954–f6954. doi:10.1136/bmj.f6954  
6  
7  
8  
9  
10  
11 20 Turtle EJ, Dear JW, Webb DJ. A systematic review of the effect of paracetamol on blood  
12 pressure in hypertensive and non-hypertensive subjects. *Br J Clin Pharmacol*  
13 2013;**75**:1396–405. doi:10.1111/bcp.12032  
14  
15  
16  
17  
18 21 MacIntyre IM, Turtle EJ, Farrah TE, *et al.* Regular Acetaminophen Use and Blood  
19 Pressure in People With Hypertension: The PATH-BP Trial. *Circulation* 2022;**145**:416–  
20 23. doi:10.1161/CIRCULATIONAHA.121.056015  
21  
22  
23  
24  
25  
26 22 Ubeda A, Llopico J, Sanchez MT. Blood pressure reduction in hypertensive patients after  
27 withdrawal of effervescent medication. *Pharmacoepidemiol Drug Saf* 2009;**18**:417–9.  
28 doi:10.1002/pds.1701  
29  
30  
31  
32  
33  
34 23 Bundesministerium der Justiz, Bundesamt für Justiz. Verordnung über  
35 Nahrungsergänzungsmittel (Nahrungsergänzungsmittelverordnung - NemV).  
36 2017;:2011–3.  
37  
38  
39  
40  
41  
42 24 Europäisches Parlament. RICHTLINIE 2002/46/EG DES EUROPÄISCHEN  
43 PARLAMENTS UND DES RATES vom 10. Juni 2002 zur Angleichung der  
44 Rechtsvorschriften der Mitgliedstaaten über Nahrungsergänzungsmittel. 2017;**21**:1–37.  
45  
46  
47  
48  
49 25 Ludwig W-D, Mühlbauer B, Seifert R. *Arzneiverordnungs-Report 2021*. Springer 2021.  
50  
51  
52 26 Tan M, He F, Morris JK, *et al.* Reducing daily salt intake in China by 1 g could prevent  
53 almost 9 million cardiovascular events by 2030: a modelling study. *BMJ Nutr Prev Heal*  
54 2022;:e000408. doi:10.1136/bmjnph-2021-000408  
55  
56  
57  
58  
59  
60 27 Ronis MJJ, Pedersen KB, Watt J. Adverse Effects of Nutraceuticals and Dietary



- 1  
2  
3 Supplements. *Annu Rev Pharmacol Toxicol* 2018;**58**:583–601. doi:10.1146/annurev-  
4 pharmtox-010617-052844  
5  
6  
7  
8  
9 28 Moyer MW. Nutrition: Vitamins on trial. *Nature* 2014;**510**:462–4. doi:10.1038/510462a  
10  
11 29 Andrews KW, Gusev PA, McNeal M, *et al.* Dietary Supplement Ingredient Database  
12 (DSID) and the Application of Analytically Based Estimates of Ingredient Amount to  
13 Intake Calculations. *J Nutr* 2018;**148**:1413S-1421S. doi:10.1093/jn/nxy092  
14  
15  
16  
17  
18  
19 30 Cohen PA, Avula B, Wang Y-H, *et al.* Quantity of Melatonin and CBD in Melatonin  
20 Gummies Sold in the US. *JAMA* 2023;**329**:1401. doi:10.1001/jama.2023.2296  
21  
22  
23  
24  
25 31 Tucker J, Fischer T, Upjohn L, *et al.* Unapproved Pharmaceutical Ingredients Included  
26 in Dietary Supplements Associated With US Food and Drug Administration Warnings.  
27  
28  
29  
30  
31  
32  
33  
34  
35  
36  
37  
38  
39  
40  
41  
42  
43  
44  
45  
46  
47  
48  
49  
50  
51  
52  
53  
54  
55  
56  
57  
58  
59  
60

## Tables

**Table 1. Sodium content of German dietary supplement effervescent tablets**

| Category                        | Brand name®                                         | Sodium content/tablet (mg) | % of maximum recommended daily sodium intake* | Sodium (g)/100g product | Weight/tablet (g) |
|---------------------------------|-----------------------------------------------------|----------------------------|-----------------------------------------------|-------------------------|-------------------|
| Vitamins                        | fit+Vital Vitamin C1000                             | 564.70                     | 28                                            | 9.01                    | 6.27              |
|                                 | elkos Vivede Vitamin C +Zink, Selen, und Vitamin D3 | 541.10                     | 27                                            | 8.95                    | 6.05              |
|                                 | Doppelherz aktiv Vitamin C +Zink                    | 512.80                     | 26                                            | 8.11                    | 6.32              |
|                                 | ProLife Vitamin C +Zink, Selen, Vitamin D3          | 507.90                     | 25                                            | 8.48                    | 5.99              |
|                                 | Doppelherz aktiv Vitamin D3 2000 I.E.               | 485.10                     | 24                                            | 7.44                    | 6.52              |
|                                 | SilaVit Vitamin B12                                 | 367.30                     | 18                                            | 9.05                    | 4.06              |
|                                 | Vitalis Vitamin C 120 mg                            | 341.50                     | 17                                            | 8.54                    | 4.00              |
|                                 | Mivolis Vitamin B12                                 | 333.00                     | 17                                            | 8.08                    | 4.12              |
|                                 | Mivolis Vitamin C                                   | 330.30                     | 17                                            | 8.02                    | 4.12              |
|                                 | Doppelherz aktiv A-Z Multivitamin+ Mineralien       | 321.40                     | 16                                            | 5.10                    | 6.30              |
|                                 | SilaVit Vitamin C                                   | 318.00                     | 16                                            | 7.92                    | 4.02              |
|                                 | fit+Vital Multivitamin                              | 304.60                     | 15                                            | 7.57                    | 4.02              |
|                                 | elkos Vivede Multivitamin+ Mineralstoffe            | 273.50                     | 14                                            | 4.56                    | 6.00              |
|                                 | ProLife Multivitamin+ Mineralstoffe                 | 263.20                     | 13                                            | 4.38                    | 6.01              |
| fit+Vital Multivitamin+ Mineral | 210.70                                              | 11                         | 5.26                                          | 4.01                    |                   |
| Magnesium                       | Doppelherz aktiv Magnesium 400                      | 332.50                     | 17                                            | 5.11                    | 6.51              |
|                                 | Vitalis Magnesium 240 mg                            | 306.10                     | 15                                            | 5.58                    | 5.49              |
|                                 | Abtei Magnesium 400 Plus Vitamin C+E                | 298.70                     | 15                                            | 5.56                    | 5.38              |
|                                 | Doppelherz aktiv Magnesium+ Calcium+ D3             | 271.20                     | 14                                            | 4.12                    | 6.59              |
|                                 | Doppelherz aktiv Magnesium 500+ B12                 | 268.90                     | 13                                            | 4.12                    | 6.53              |

|                                                                                                    |                                                    |        |    |      |       |
|----------------------------------------------------------------------------------------------------|----------------------------------------------------|--------|----|------|-------|
|                                                                                                    | Mivolis Magnesium                                  | 262.70 | 13 | 6.39 | 4.11  |
|                                                                                                    | elkos Vivede Magnesium+ B-Komplex, Vitamin C und E | 248.40 | 12 | 4.13 | 6.01  |
|                                                                                                    | Doppelherz aktiv Magnesium+ Kalium Sport           | 245.50 | 12 | 3.72 | 6.60  |
|                                                                                                    | ProLife Magnesium+ B-Komplex, Vitamin C&E          | 238.00 | 12 | 3.95 | 6.03  |
|                                                                                                    | Kneipp Magnesium+ Calcium+ D3                      | 221.30 | 11 | 4.91 | 4.51  |
|                                                                                                    | Abtei Magnesium+ Kalium Aktiv Plus                 | 138.10 | 7  | 2.52 | 5.48  |
|                                                                                                    | fit+Vital Magnesium                                | 117.80 | 6  | 2.95 | 3.99  |
|                                                                                                    | fit+Vital Magnesium 400                            | 76.00  | 4  | 1.40 | 5.41  |
| Calcium                                                                                            | ProLife Calcium+ Vitamin K1, D3, Folsäure          | 335.90 | 17 | 5.60 | 6.00  |
|                                                                                                    | Mivolis Calcium                                    | 145.90 | 7  | 3.53 | 4.14  |
|                                                                                                    | fit+Vital Calcium+ D3                              | 116.20 | 6  | 2.89 | 4.02  |
|                                                                                                    | fit+Vital Calcium 1000                             | 83.70  | 4  | 1.36 | 6.17  |
| Minerals                                                                                           | Kneipp Männer Mineralstoffe                        | 217.00 | 11 | 3.87 | 5.61  |
|                                                                                                    | Kneipp Frauen Mineralstoffe                        | 209.40 | 10 | 3.33 | 6.29  |
|                                                                                                    | Mivolis Multi-Mineral                              | 148.40 | 7  | 3.62 | 4.10  |
| Other products                                                                                     | fit+Vital Eisen+ Vitamin C                         | 382.90 | 19 | 9.63 | 3.98  |
|                                                                                                    | SilaVit Immun Aktiv                                | 363.80 | 18 | 8.55 | 4.25  |
|                                                                                                    | sanotact Recovery+ Aminosäuren                     | 187.60 | 9  | 3.54 | 5.29  |
|                                                                                                    | isostar Hydrate & Perform                          | 181.00 | 9  | 1.51 | 11.99 |
| *Maximum recommended daily sodium intake according to World Health Organization recommendations[8] |                                                    |        |    |      |       |

**Table 2. Sodium content per: (A) Dietary supplement effervescent tablet available in Germany, (B) Dietary supplement effervescent tablet in the USA, (C) OTC effervescent tablet, (D) recommended daily dose of the included OTC effervescent tablets**

| <b>A</b>                 |                                                                   |                                                                       |
|--------------------------|-------------------------------------------------------------------|-----------------------------------------------------------------------|
| <b>Category</b>          | <b>Sodium content (mg)/tablet mean±SD</b>                         | <b>% of the maximum recommended daily sodium intake* mean±SD</b>      |
| ...all included products | 283.9±122.6                                                       | 14±6                                                                  |
| ...vitamin products      | 378.3±112.8                                                       | 19±6                                                                  |
| ...magnesium products    | 232.7±76.7                                                        | 12±4                                                                  |
| ...calcium products      | 170.4±113.2                                                       | 9±6                                                                   |
| ...mineral products      | 191.6±37.6                                                        | 10±2                                                                  |
| ...other products        | 278.8±109.5                                                       | 14±6                                                                  |
| <b>B</b>                 |                                                                   |                                                                       |
| <b>Category</b>          | <b>Sodium content (mg)/tablet Median (IQR)</b>                    | <b>% of the maximum recommended daily sodium intake* Median (IQR)</b> |
| ...all included products | 190.0 (100.0-250.0)                                               | 10 (5-13)                                                             |
| ...vitamin products      | 100.0 (72.5-230.0)                                                | 5 (4-12)                                                              |
| ...mineral products      | 250.0 (140.0-360.0)                                               | 13 (7-18)                                                             |
| ...energy products       | 190.0 (150.0-260.0)                                               | 10 (8-13)                                                             |
| ...other products        | 210.0 (158.8-256.3)                                               | 11 (8-13)                                                             |
| <b>C</b>                 |                                                                   |                                                                       |
| <b>Category</b>          | <b>Sodium content (mg)/tablet Median (IQR)</b>                    | <b>% of the maximum recommended daily sodium intake* Median (IQR)</b> |
| ...all included drugs    | 157.0 (98.9-417.3)                                                | 8 (5-21)                                                              |
| ...pain/common cold      | 452.1 (351.3-474.0)                                               | 23 (18-24)                                                            |
| ...cough                 | 138.8 (112.8-157.9)                                               | 7 (6-8)                                                               |
| ...calcium/vitamin D     | 87.0 (52.0-103.0)                                                 | 4 (3-5)                                                               |
| ...other drugs           | 267.0 (119.8-387.5)                                               | 13 (6-19)                                                             |
| <b>D</b>                 |                                                                   |                                                                       |
| <b>Category</b>          | <b>Sodium content (mg) of the maximum daily dose Median (IQR)</b> | <b>% of the maximum recommended daily sodium intake* Median (IQR)</b> |
| ...all included drugs    | 384.0 (139.0-1295.5)                                              | 19 (7-65)                                                             |
| ...pain/common cold      | 2,776.5 (1,299.8-3,333.0)                                         | 139 (65-167)                                                          |
| ...cough                 | 297.0 (144.5-427.0)                                               | 15 (7-21)                                                             |
| ...calcium/vitamin D     | 104.0 (96.3-104.8)                                                | 5 (5-5)                                                               |
| ...other drugs           | 801.0 (312.8-1,155.5)                                             | 40 (16-58)                                                            |

1  
2  
3  
4  
5  
6  
7  
8  
9  
10  
11  
12  
13  
14  
15  
16  
17  
18  
19  
20  
21  
22  
23  
24  
25  
26  
27  
28  
29  
30  
31  
32  
33  
34  
35  
36  
37  
38  
39  
40  
41  
42  
43  
44  
45  
46  
47  
48  
49  
50  
51  
52  
53  
54  
55  
56  
57  
58  
59  
60

\*Maximum recommended daily sodium intake according to World Health Organization recommendations[8]  
IQR= interquartile range; OTC= over-the-counter, SD= standard deviation

For peer review only

**Table 3. Sodium content of OTC effervescent tablets**

| Category                                         | Brand name® (manufacturer)                           | sodium content/tablet (mg) | % of the maximum recommended daily sodium intake* of one tablet | sodium content of maximum recommended daily dose (mg) | % of maximum recommended daily sodium intake* of the maximum recommended daily dose | Maximum recommended tablets per day | OTC | Active ingredients                                       | Sales figures                                            |
|--------------------------------------------------|------------------------------------------------------|----------------------------|-----------------------------------------------------------------|-------------------------------------------------------|-------------------------------------------------------------------------------------|-------------------------------------|-----|----------------------------------------------------------|----------------------------------------------------------|
| Pain/common cold (frequently dispensed products) | Aspirin Migräne (Bayer)                              | 544                        | 27                                                              | 3,264                                                 | 163                                                                                 | 6                                   | yes | aspirin                                                  | 3.96 million packs of this class sold in 2021 in Germany |
|                                                  | ASS + C-ratiopharm gegen Schmerzen (Ratiopharm)      | 477                        | 24                                                              | 2,385                                                 | 119                                                                                 | 5                                   | yes | aspirin, ascorbic acid                                   |                                                          |
|                                                  | ASPIRIN plus C forte (Bayer)                         | 473                        | 24                                                              | 1,419                                                 | 71                                                                                  | 3                                   | yes | aspirin, ascorbic acid                                   |                                                          |
|                                                  | ASPIRIN plus C (Bayer)                               | 466                        | 23                                                              | 2,796                                                 | 140                                                                                 | 6                                   | yes | Aspirin, ascorbic acid                                   |                                                          |
|                                                  | Togal Kopfschmerz-Brause + Vitamin C (Kyberg Pharma) | 459                        | 23                                                              | 2,754                                                 | 138                                                                                 | 6                                   | yes | Aspirin, ascorbic acid, caffeine                         |                                                          |
|                                                  | Alka-Seltzer classic (Bayer)                         | 445                        | 22                                                              | 3,560                                                 | 178                                                                                 | 8                                   | yes | aspirin                                                  |                                                          |
|                                                  | FIZAMOL 500 mg (Accord Healthcare)                   | 419                        | 21                                                              | 3,352                                                 | 168                                                                                 | 8                                   | yes | acetaminophen                                            |                                                          |
|                                                  | PARACETAMOL-ratiopharm 500 mg (Ratiopharm)           | 416                        | 21                                                              | 3,328                                                 | 166                                                                                 | 8                                   | yes | acetaminophen                                            |                                                          |
|                                                  | WICK DayMed Erkältungsgetränk (WICK Pharma)          | 157                        | 8                                                               | 942                                                   | 47                                                                                  | 6                                   | yes | acetaminophen, guaifenesin, phenylephrine                |                                                          |
|                                                  | Grippostad C Stickpack (STADA Consumer Health)       | 128                        | 6                                                               | 384                                                   | 19                                                                                  | 3                                   | yes | acetaminophen, chlorpheniramine, ascorbic acid, caffeine |                                                          |
| Cough (frequently dispensed products)            | NAC-ratiopharm 200 mg, (Ratiopharm)                  | 190                        | 10                                                              | 570                                                   | 29                                                                                  | 3                                   | yes | acetylcysteine                                           | 5.30 million packs of this class sold in 2021 in Germany |
|                                                  | Fluimucil 200 mg (Zambon)                            | 158                        | 8                                                               | 474                                                   | 24                                                                                  | 3                                   | no  | acetylcysteine                                           |                                                          |
|                                                  | Fluimucil long 600 mg (Zambon)                       | 158                        | 8                                                               | 158                                                   | 8                                                                                   | 1                                   | no  | acetylcysteine                                           |                                                          |
|                                                  | NAC-ratiopharm 600 mg (Ratiopharm)                   | 150                        | 8                                                               | 150                                                   | 8                                                                                   | 1                                   | yes | acetylcysteine                                           |                                                          |
|                                                  | ACC akut 600mg (Hexal)                               | 139                        | 7                                                               | 139                                                   | 7                                                                                   | 1                                   | yes | acetylcysteine                                           |                                                          |
|                                                  | NAC 600 akut (IA Pharma)                             | 139                        | 7                                                               | 139                                                   | 7                                                                                   | 1                                   | yes | acetylcysteine                                           |                                                          |
|                                                  | Ambrobeta 30 (betapharm Arzneimittel)                | 127                        | 6                                                               | 381                                                   | 19                                                                                  | 3                                   | yes | ambroxol                                                 |                                                          |
|                                                  | ACC akut 200mg (Hexal)                               | 99                         | 5                                                               | 297                                                   | 15                                                                                  | 3                                   | yes | acetylcysteine                                           |                                                          |
|                                                  | NAC 200 akut (IA Pharma)                             | 99                         | 5                                                               | 297                                                   | 15                                                                                  | 3                                   | yes | acetylcysteine                                           |                                                          |

|                                                                                                                                                                                         |                                                         |     |    |       |    |    |     |                     |                                                                                                                           |
|-----------------------------------------------------------------------------------------------------------------------------------------------------------------------------------------|---------------------------------------------------------|-----|----|-------|----|----|-----|---------------------|---------------------------------------------------------------------------------------------------------------------------|
| Calcium/<br>vitamin D3<br>(colecalfiferol;<br>examples of<br>frequently<br>prescribed<br>effervescent<br>tablets)                                                                       | Calcium Sandoz forte (Hexal)                            | 288 | 14 | 864   | 43 | 3  | yes | Calcium + vitamin D | 52.32 million<br>DDD of the<br>entire class<br>claimed to the<br>expense of the<br>SHI funds in<br>2021 in<br>Germany[25] |
|                                                                                                                                                                                         | Calcium D3 acis 1.200/ 800 (acis<br>Arzneimittel)       | 105 | 5  | 105   | 5  | 1  | yes | Calcium + vitamin D |                                                                                                                           |
|                                                                                                                                                                                         | CalciCare-D3 forte 1.000 mg/<br>880 I.E. (ORION Pharma) | 97  | 5  | 97    | 5  | 1  | yes | Calcium + vitamin D |                                                                                                                           |
|                                                                                                                                                                                         | Calcilac 1000 mg/ 880 I.E.<br>(MIBE Arzneimittel)       | 96  | 5  | 96    | 5  | 1  | yes | Calcium + vitamin D |                                                                                                                           |
|                                                                                                                                                                                         | Osteoplus 1.000 mg/ 1.000 I.E.<br>(Recordati Pharma)    | 78  | 4  | 78    | 4  | 1  | yes | Calcium + vitamin D |                                                                                                                           |
|                                                                                                                                                                                         | Calcigen D 600/ 400 (MEDA<br>Pharma)                    | 52  | 3  | 104   | 5  | 2  | yes | Calcium + vitamin D |                                                                                                                           |
|                                                                                                                                                                                         | Calcium D3-ratiopharm 600/ 400<br>(Ratiopharm)          | 52  | 3  | 104   | 5  | 2  | yes | Calcium + vitamin D |                                                                                                                           |
|                                                                                                                                                                                         | Calcium Sandoz D Osteo 600<br>mg/ 400 I.E. (Hexal)      | 52  | 3  | 104   | 5  | 2  | yes | Calcium + vitamin D |                                                                                                                           |
| Other drugs<br>(examples)                                                                                                                                                               | Gittalun (Hermes Arzneimittel)                          | 575 | 29 | 1,150 | 58 | 2  | yes | doxylamine          | -                                                                                                                         |
|                                                                                                                                                                                         | Zink-ratiopharm 25mg<br>(Ratiopharm)                    | 325 | 16 | 325   | 16 | 1  | yes | zinc                |                                                                                                                           |
|                                                                                                                                                                                         | Magnesium Verla (Verla-Pharm<br>Arzneimittel)           | 314 | 16 | 942   | 47 | 3  | yes | magnesium           |                                                                                                                           |
|                                                                                                                                                                                         | Lösferron (MIBE Arzneimittel)                           | 220 | 11 | 660   | 33 | 3  | yes | Fe-(II)-D-gluconat  |                                                                                                                           |
|                                                                                                                                                                                         | Magnesiocard 7,5 mmol (Verla-<br>Pharm Arzneimittel)    | 138 | 7  | 276   | 14 | 2  | yes | magnesium           |                                                                                                                           |
|                                                                                                                                                                                         | Morphin Painbreak akut 20 mg<br>(PB Pharma)             | 65  | 3  | 1,170 | 59 | 18 | no  | morphine            |                                                                                                                           |
| *Maximum recommended daily sodium intake according to World Health Organization recommendations[8]<br>DDD= defined daily doses; OTC= over-the-counter; SHI= statutory health insurance. |                                                         |     |    |       |    |    |     |                     |                                                                                                                           |

1  
2  
3 **Figure titles**  
4  
5

6 **Figure 1.** Mean sodium content of dietary supplement effervescent tablets available in  
7  
8 Germany, by category  
9

10  
11 **Figure 2.** Sodium content of the maximum recommended daily dose of some included  
12  
13 effervescent over-the-counter tablets  
14  
15  
16  
17  
18  
19  
20  
21  
22  
23  
24  
25  
26  
27  
28  
29  
30  
31  
32  
33  
34  
35  
36  
37  
38  
39  
40  
41  
42  
43  
44  
45  
46  
47  
48  
49  
50  
51  
52  
53  
54  
55  
56  
57  
58  
59  
60



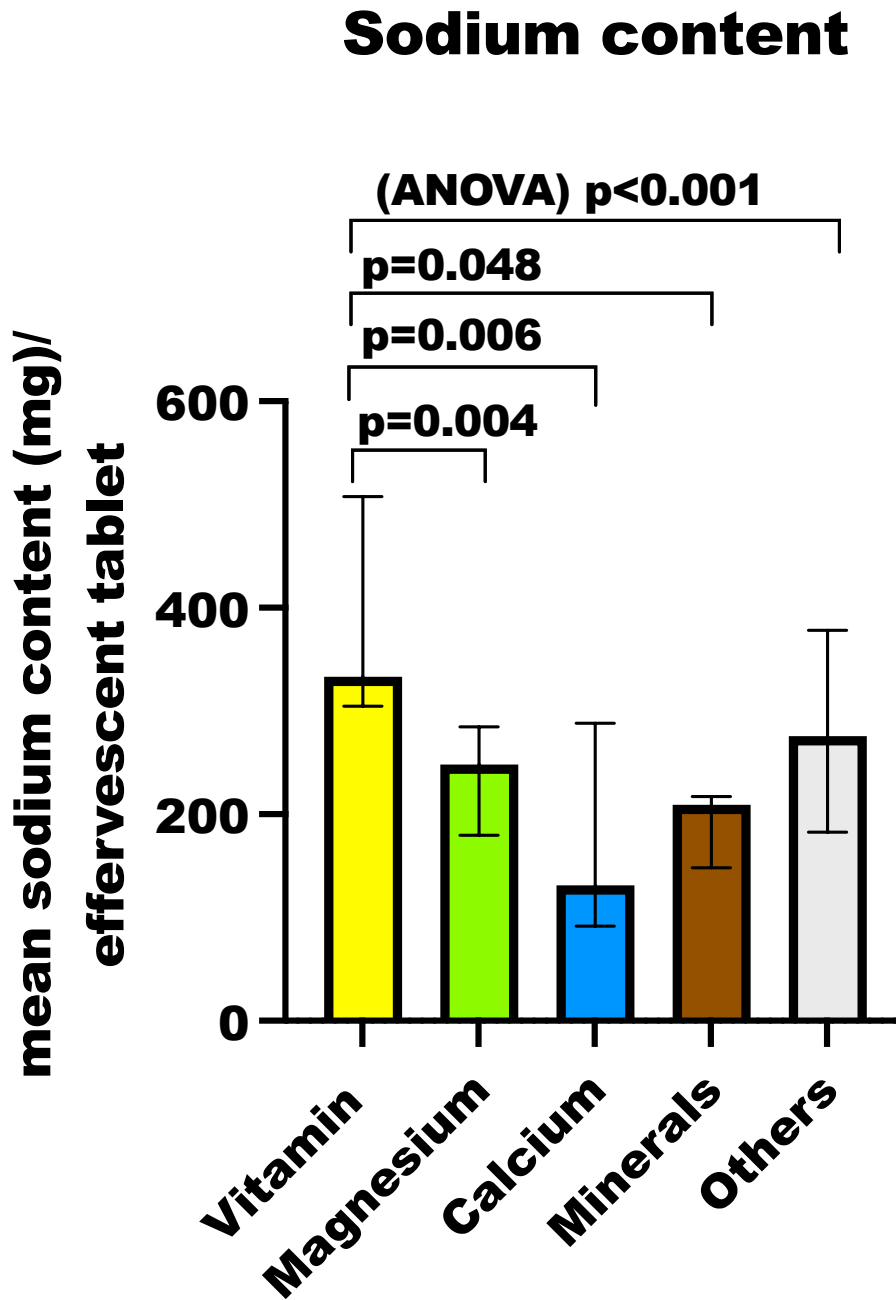

Figure 1. Mean sodium content of the respective category of the German dietary supplement effervescent tablets. P values are given for between-group comparisons (adjusted for post hoc method). ANOVA = analysis of variance.

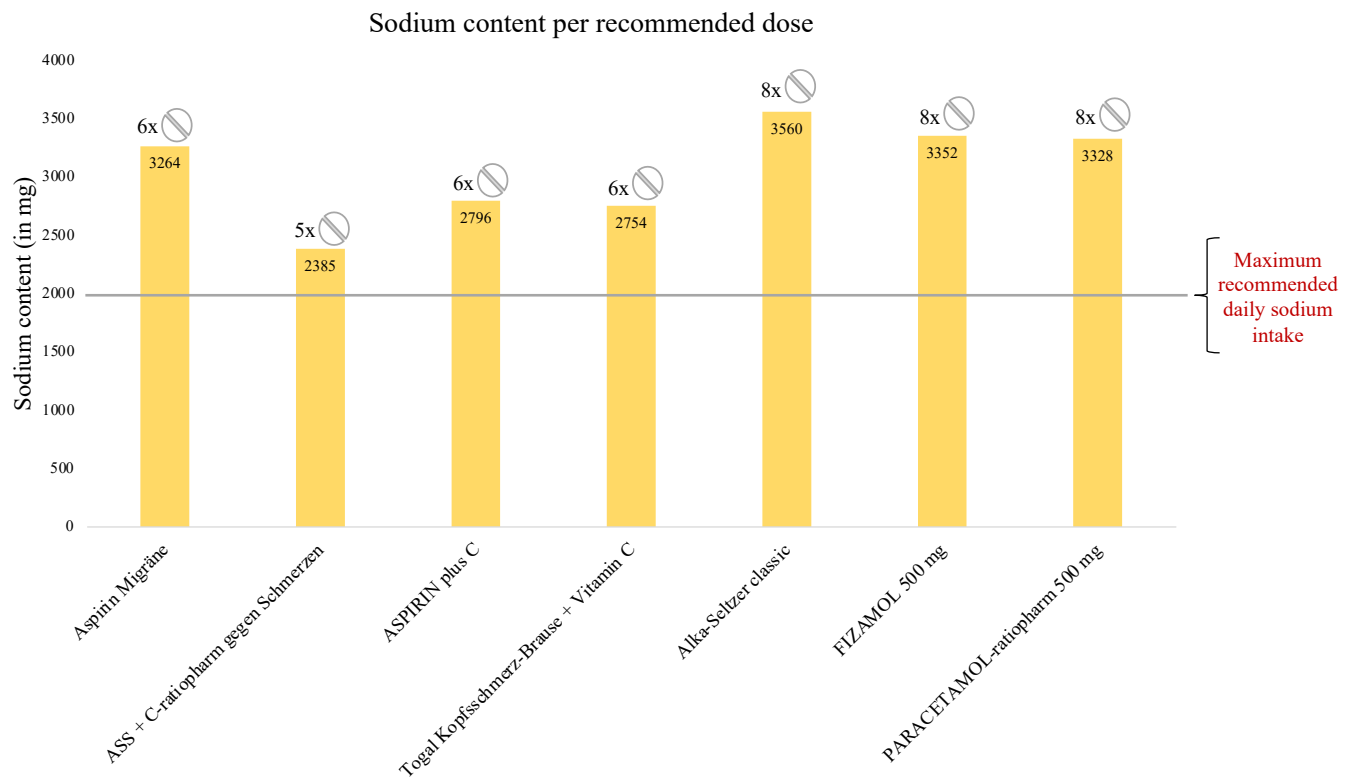

Figure 2. Sodium content of the maximum recommended daily dose of some included effervescent OTC tablets. The number above the bars corresponds to the maximum daily number of tablets. (Aspirin Migräne®: Bayer; ASS + C-ratiopharm gegen Schmerzen®: Ratiopharm; ASPIRIN plus C®: Bayer; Total Kopfschmerz-Brause + Vitamin C®: Kyberg Pharma; Alka-Seltzer classic®: Bayer; FIZAMOL 500 mg®: Accord Healthcare, Paracetamol-ratiopharm 500mg®: Ratiopharm)

1  
2  
3 Supplemental table 1. Overview of the included German products.  
4

5 Supplemental table 2. Sodium content of the included products from the United States of  
6  
7 America.  
8  
9

10 Supplement figure 1. Number of different German dietary supplement effervescent tablets that  
11  
12 contain a certain amount of sodium (classified in 100 mg increments).  
13  
14

15  
16 Supplement figure 2. Number of different pharmacy-only effervescent tablets that contain a  
17  
18 certain amount of sodium (classified in 100 mg increments).  
19  
20

21 Supplement figure 3. Central illustration.  
22  
23  
24  
25  
26  
27  
28  
29  
30  
31  
32  
33  
34  
35  
36  
37  
38  
39  
40  
41  
42  
43  
44  
45  
46  
47  
48  
49  
50  
51  
52  
53  
54  
55  
56  
57  
58  
59  
60

Supplement table 1. Overview of the included German products.

| Offeror                                 | Manufacturer | Brand name®                           | Number of tablets | Total weight (g) | Weight/tablet (g) | Total price (cent) | Price/tablet (cent) |
|-----------------------------------------|--------------|---------------------------------------|-------------------|------------------|-------------------|--------------------|---------------------|
| ALDI SÜD GmbH & Co.                     | Vitalis      | Magnesium 240 mg                      | 14                | 78               | 5.6               | 45                 | 3.2                 |
|                                         |              | VitaminC 120 mg                       | 20                | 80               | 4.0               | 45                 | 2.3                 |
| Edeka Stiftung & Co. KG                 | ELKOS Vivede | VitaminC+ Zink, Selen, Vitamin D3     | 17                | 102              | 6.0               | 55                 | 3.2                 |
|                                         |              | Magnesium+ B-Komplex, Vitamin C und E | 17                | 102              | 6.0               | 55                 | 3.2                 |
|                                         |              | Multivitamin+ Mineralstoffe           | 17                | 102              | 6.0               | 55                 | 3.2                 |
| Netto Marken-Discount Stiftung & Co. KG | ProLife      | VitaminC+ Zink, Selen, Vitamin D3     | 17                | 102              | 6.0               | 55                 | 3.2                 |
|                                         |              | Magnesium+ B-Komplex, Vitamin C&E     | 17                | 102              | 6.0               | 55                 | 3.2                 |
|                                         |              | Multivitamin+ Mineralstoffe           | 17                | 102              | 6.0               | 55                 | 3.2                 |
|                                         |              | Calcium+ Vitamin K1, D3, Folsäure     | 17                | 102              | 6.0               | 55                 | 3.2                 |
| DM drogerie markt GmbH & Co. KG         | Mivolis      | Magnesium                             | 20                | 82               | 4.1               | 45                 | 2.3                 |
|                                         |              | VitaminB12                            | 20                | 82               | 4.1               | 45                 | 2.3                 |
|                                         |              | Calcium                               | 20                | 82               | 4.1               | 45                 | 2.3                 |
|                                         |              | Multi-Mineral                         | 20                | 82               | 4.1               | 45                 | 2.3                 |
|                                         |              | VitaminC                              | 20                | 82               | 4.1               | 45                 | 2.3                 |
|                                         | Kneipp       | Magnesium+ Calcium+ D3                | 20                | 90               | 4.5               | 245                | 12.3                |
| Müller Handels GmbH & Co. KG            | Kneipp       | Frauen Mineralstoffe                  | 15                | 94               | 6.3               | 345                | 23.0                |
|                                         |              | Männer Mineralstoffe                  | 15                | 84               | 5.6               | 399                | 26.6                |
|                                         | Abtei        | Magnesium400 Plus Vitamin C+E         | 15                | 81               | 5.4               | 295                | 19.7                |
|                                         |              | Magnesium+ Kalium Aktiv Plus          | 15                | 82.5             | 5.5               | 275                | 18.3                |
|                                         | Sanotact     | Recovery+ Aminosäuren                 | 15                | 79.5             | 5.3               | 295                | 19.7                |
|                                         | Doppelherz   | VitaminC+ Zink                        | 15                | 94.5             | 6.3               | 295                | 19.7                |
|                                         |              | VitaminD3 2000 IE                     | 15                | 97.5             | 6.5               | 275                | 18.3                |
|                                         |              | A-Z Multivitamin+ Mineralien          | 15                | 93               | 6.2               | 279                | 18.6                |
| Magnesium 400                           |              | 15                                    | 97.5              | 6.5              | 275               | 18.3               |                     |

|  |             |                         |    |      |      |     |      |
|--|-------------|-------------------------|----|------|------|-----|------|
|  |             | Magnesium+ Calcium+ D3  | 15 | 97.5 | 6.5  | 279 | 18.6 |
|  |             | Magnesium 500+ B12      | 15 | 97.5 | 6.5  | 249 | 16.6 |
|  |             | Magnesium+ Kalium Sport | 15 | 99   | 6.6  | 299 | 19.9 |
|  | Fit + Vital | Caclium+ D3             | 20 | 80   | 4.0  | 139 | 7.0  |
|  |             | Multivitamin            | 20 | 80   | 4.0  | 45  | 2.3  |
|  |             | Vitamin C1000           | 15 | 93   | 6.2  | 139 | 9.3  |
|  |             | Multivitamin+ Mineral   | 20 | 80   | 4.0  | 45  | 2.3  |
|  |             | Magnesium               | 20 | 80   | 4.0  | 45  | 2.3  |
|  |             | Eisen+ VitaminC         | 20 | 80   | 4.0  | 139 | 7.0  |
|  |             | Cacium 1000             | 15 | 93   | 6.2  | 45  | 3.0  |
|  |             | Magnesium 400           | 15 | 81   | 5.4  | 45  | 3.0  |
|  | SilaVit     | Immun Aktiv             | 20 | 84   | 4.2  | 139 | 7.0  |
|  |             | Vitamin B12             | 20 | 80   | 4.0  | 125 | 6.3  |
|  |             | Vitamin C               | 20 | 80   | 4.0  | 45  | 2.3  |
|  | Isostar     | Hydrate & Perform       | 10 | 120  | 12.0 | 399 | 39.9 |

Supplement table 2. Sodium content of the included products from the United States of America.

| Brand name®                                               | Manufacturer            | Category | Sodium content/tablet (mg) |
|-----------------------------------------------------------|-------------------------|----------|----------------------------|
| ActivJoint Tangerine                                      | Trace Minerals Research | Other    | 155                        |
| Advanced Anti-Aging Formula Effervescent Drink Mix Orange | TimeFighters            | Other    | 55                         |
| Airborne Dual Action Citrus                               | Airborne                | Vitamin  | 230                        |
| Airborne Elderberry Effervescent Tablets                  | Airborne                | Mineral  | 230                        |
| Airborne Immune Support Effervescent Tablets              | Airborne                | Vitamin  | 230                        |
| Airborne Vitamin C Original Lemon Lime                    | Airborne                | Vitamin  | 230                        |
| Airborne Zesty Orange                                     | Airborne                | Mineral  | 150                        |
| Alka-Seltzer Plus Immunity Complex                        | Bayer                   | Vitamin  | 313                        |
| Amino X Fruit Punch                                       | BSN                     | Other    | 160                        |
| AngiNOX Natural Orange Flavor                             | XYMOGEN                 | Other    | 220                        |
| Berocca Orange Flavor                                     | Bayer                   | Energy   | 260                        |
| Best Defense Orange Boost                                 | Herbalife Nutrition     | Vitamin  | 115                        |
| BetaBoost + Vitamin C Citrus                              | Airborne Advanced       | Vitamin  | 240                        |
| Carni-Fizz Natural Lemon Lime Flavor                      | Body Fizzics            | Other    | 245                        |
| CuraMed Natural Tangerine Flavor                          | Terry Naturally         | Other    | 130                        |

|                                                                     |                         |         |     |
|---------------------------------------------------------------------|-------------------------|---------|-----|
| CuraPro 350 mg Tangerine Effervescent                               | EuroMedica              | Mineral | 130 |
| Effer-C Lemon-Lime Effervescent Drink Mix                           | NOW                     | Vitamin | 50  |
| Effervescent Effer-Energy Tropical Punch                            | NOW Sports              | Mineral | 360 |
| Effervescent Effer-Hydrate                                          | NOW Sports              | Mineral | 360 |
| Effervescent Energy Lava Lime                                       | Eruption                | Energy  | 240 |
| Effervescent Vitamin C 1000 mg Natural Orange Flavor                | Sundown Naturals        | Vitamin | 60  |
| Effervescent Vitamin C Orange Flavored                              | 365 Everyday Value      | Vitamin | 60  |
| Energize Isotropin Lemon Flavor Effervescent                        | Newton-Everett          | Energy  | 150 |
| Energy Berry Blast                                                  | Nuun                    | Energy  | 100 |
| Ester-C Effervescent 100 mg Plus Electrolytes Natural Orange Flavor | American Health         | Vitamin | 100 |
| Ester-C Effervescent 1000 mg Natural Orange Flavor                  | NatureSmart             | Vitamin | 100 |
| Ester-C Effervescent 1000 mg Natural Raspberry                      | American Health         | Vitamin | 55  |
| Ester-C Effervescent 1000 mg Natural Raspberry Flavor               | Solgar                  | Vitamin | 40  |
| Evotest Black Cherry                                                | BSN                     | Other   | 300 |
| Garcinia Cambogia Lineatabs Passion Fruit Flavor                    | Apax                    | Other   | 190 |
| Green Superfood Detox Orange Turmeric Flavor                        | Amazing Grass           | Other   | 260 |
| Immune Oxylent Effervescent Supplement Drink                        | Immune Oxylent          | Vitamin | 90  |
| Immune Support Orange Flavor                                        | Equate                  | Vitamin | 230 |
| Immuni-V Orange Effervescent                                        | MRI Performance         | Vitamin | 85  |
| Immunity Blueberry Tangerine                                        | Nuun                    | Vitamin | 100 |
| Isotropin Rejuvenation Tangerine Flavor                             | NewtonEverett           | Other   | 255 |
| Liftoff Tropical Fruit Force                                        | Herbalife Nutrition     | Vitamin | 230 |
| Lineatabs                                                           | Apax                    | Other   | 270 |
| Nuun Active Fruit Punch                                             | Nuun                    | Vitamin | 360 |
| Nuun Hydration Tri-Berry                                            | Nuun                    | Mineral | 360 |
| POW Berry-Melon Fizz                                                | EBOOST                  | Energy  | 190 |
| POW Berry-Melon Fizz                                                | EBOOST                  | Energy  | 155 |
| Power Pak Cranberry                                                 | Trace Minerals Research | Vitamin | 175 |
| Pumped Edge Fruit Punch                                             | BSN                     | Other   | 200 |
| Sambucus Fizzy Berry Flavored                                       | Nature's Way            | Other   | 160 |
| Sport +Caffeine Fresh Lime                                          | Nuun                    | Energy  | 300 |
| Sport Fruit Punch                                                   | Nuun                    | Mineral | 300 |
| Sport Oxylent 3-In-1 Performance Supplement Drink Blueberry Burst   | Sport Oxylent           | Mineral | 90  |
| Vitamins Blueberry Pomegranate                                      | Nuun                    | Vitamin | 100 |
| Wal-Born Orange Flavor                                              | Well At Walgreens       | Other   | 230 |
| ZYM Electrolyte Drink Tablets                                       | ZYM                     | Mineral | 250 |

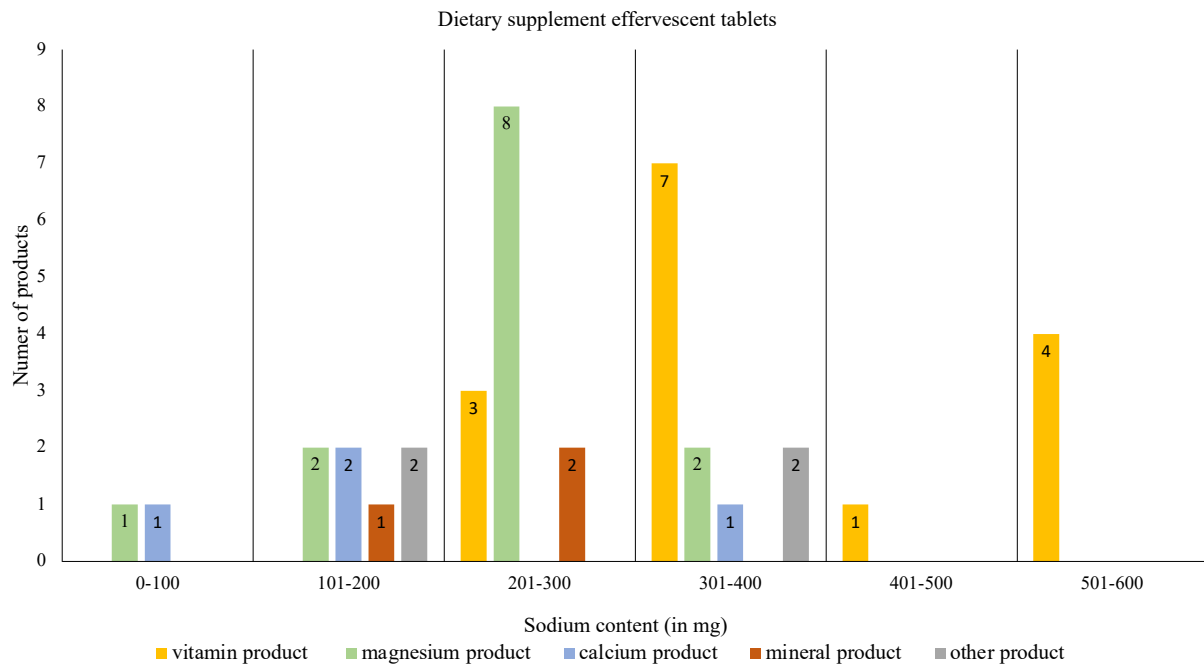

26 Supplement figure 1. Number of different German dietary supplement effervescent tablets that  
27 contain a certain amount of sodium (classified in 100 mg increments).  
28  
29  
30  
31  
32  
33  
34

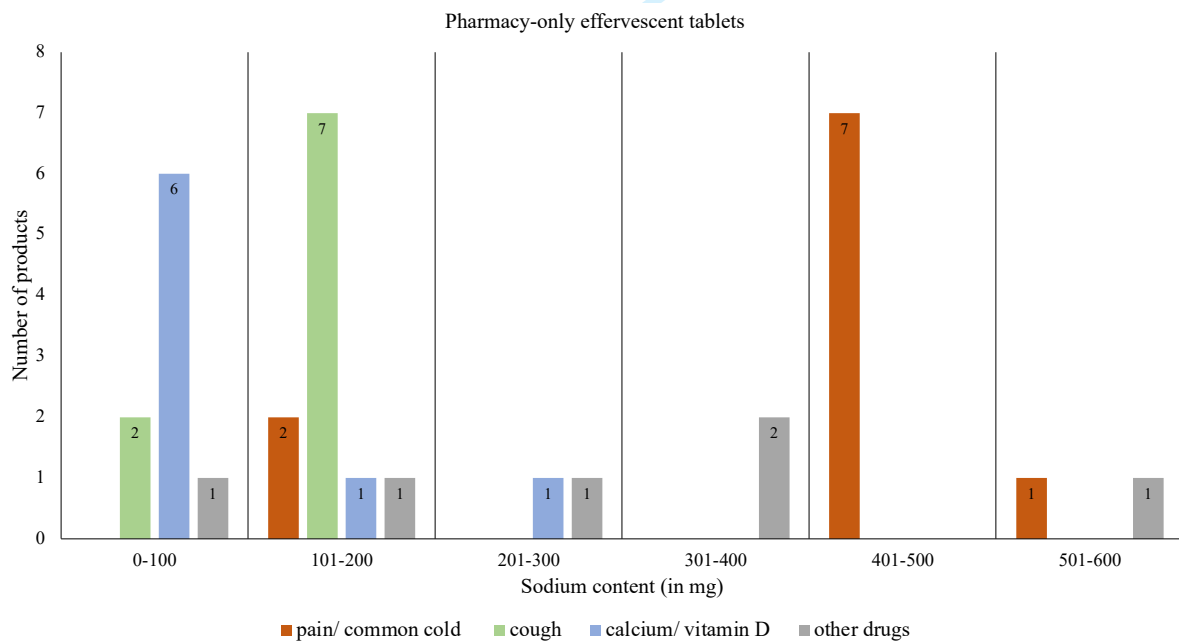

57 Supplement figure 2. Number of different pharmacy-only effervescent tablets that contain a  
58 certain amount of sodium (classified in 100 mg increments)  
59  
60

**What is known ?**

- Dietary sodium intake → BP ↑ and CV events ↑
- Recommended daily sodium intake: < 2000 mg
- ETs contain high amounts of sodium (often not labeled)
- approx. 30% of the population regularly consume ETs as dietary supplements and/or drugs

**Dietary supplement ETs**

- 39 included
- Average sodium content: 283.9±122.6 mg → 4-28% of the RDSI
- Highest average sodium content: vitamin products (378.3±112.8 mg)
- Lowest average sodium content: calcium products (170.4±113.2 mg)
- Vitamin products: more sodium than magnesium (p=0.004), calcium (p=0.006) and mineral (p=0.048) products

**Pharmacy-only ETs**

- Median sodium content: 157.0 mg (IQR: 98.9-417.3 mg) → 3-29% of the RDSI
- Highest median sodium content: pain/ common cold drugs (452.1 mg; IQR: 351.3-474.0 mg)
- Lowest median sodium content: calcium/ vitamin D drugs (87.0 mg; IQR: 52.0-103.0 mg)
- Median sodium content of the MDD of pain/ common cold drugs: 2,776.5 mg (IQR: 1,299.8-3,333.0 mg)

**Conclusion**

- ETs contain a relevant amount of sodium (often unknown or neglected)
- Additional sodium intake → poor BP control and CV events ↑
- Sodium loaded ETs should be avoided in patients at risk

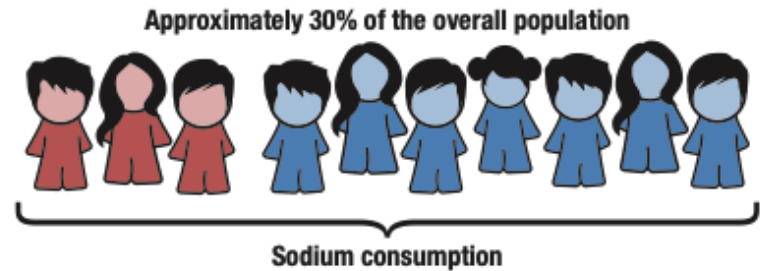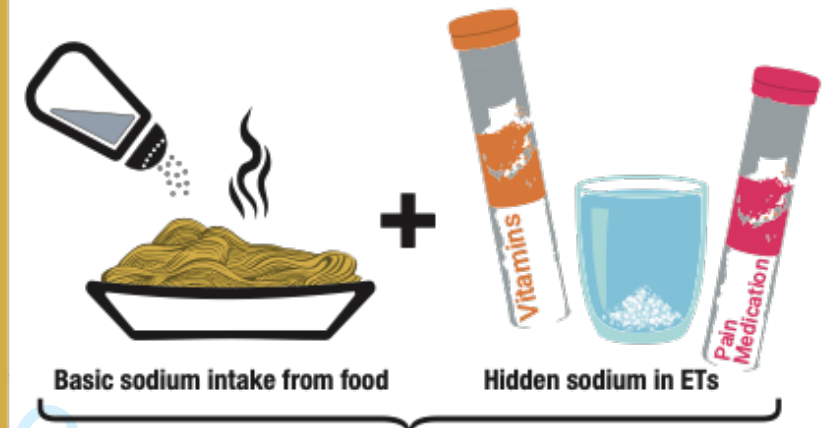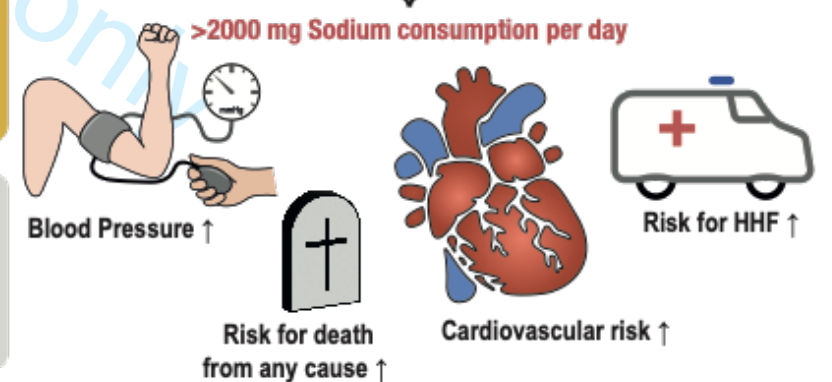



1  
2  
3 Supplement figure 3. Central illustration. BP= blood pressure; CV= cardiovascular; ET= effervescent tablets; HHF= hospitalization for acute heart  
4 failure; IQR= interquartile range; MDD= maximum daily dose; RDSI= recommended daily sodium intake.  
5  
6  
7  
8  
9  
10  
11  
12  
13  
14  
15  
16  
17  
18  
19  
20  
21  
22  
23  
24  
25  
26  
27  
28  
29  
30  
31  
32  
33  
34  
35  
36  
37  
38  
39  
40  
41  
42  
43  
44  
45  
46

For peer review only
