# Supplementary material for: Hidden sodium in effervescent-tablet dietary supplements and over-the-counter drugs: a comparative cross-sectional study
Source: PubMed Central journal article supplement — BMJ Open. 2023 Nov 27;13(11):e076302. doi: 10.1136/bmjopen-2023-076302 (PMC10685933; doi:10.1136/bmjopen-2023-076302), 2023-11-27
Supplement: bmjopen-2023-076302supp001.pdf [file bmjopen-2023-076302supp001.pdf]

Supplemental table 1. Overview of the included German products.

Supplemental table 2. Sodium content of the included products from the United States of America.

Supplement figure 1. Number of different German dietary supplement effervescent tablets that contain a certain amount of sodium (classified in 100 mg increments).

Supplement figure 2. Number of different pharmacy-only effervescent tablets that contain a certain amount of sodium (classified in 100 mg increments).

Supplement figure 3. Central illustration.

Supplement table 1. Overview of the included German products.

| Offeror                                 | Manufacturer | Brand name®                           | Number of tablets | Total weight (g) | Weight/tablet (g) | Total price (cent) | Price/tablet (cent) |
|-----------------------------------------|--------------|---------------------------------------|-------------------|------------------|-------------------|--------------------|---------------------|
| ALDI SÜD GmbH & Co.                     | Vitalis      | Magnesium 240 mg                      | 14                | 78               | 5.6               | 45                 | 3.2                 |
|                                         |              | VitaminC 120 mg                       | 20                | 80               | 4.0               | 45                 | 2.3                 |
| Edeka Stiftung & Co. KG                 | ELKOS Vivede | VitaminC+ Zink, Selen, Vitamin D3     | 17                | 102              | 6.0               | 55                 | 3.2                 |
|                                         |              | Magnesium+ B-Komplex, Vitamin C und E | 17                | 102              | 6.0               | 55                 | 3.2                 |
|                                         |              | Multivitamin+ Mineralstoffe           | 17                | 102              | 6.0               | 55                 | 3.2                 |
| Netto Marken-Discount Stiftung & Co. KG | ProLife      | VitaminC+ Zink, Selen, Vitamin D3     | 17                | 102              | 6.0               | 55                 | 3.2                 |
|                                         |              | Magnesium+ B-Komplex, Vitamin C&E     | 17                | 102              | 6.0               | 55                 | 3.2                 |
|                                         |              | Multivitamin+ Mineralstoffe           | 17                | 102              | 6.0               | 55                 | 3.2                 |
|                                         |              | Calcium+ Vitamin K1, D3, Folsäure     | 17                | 102              | 6.0               | 55                 | 3.2                 |
| DM drogerie markt GmbH & Co. KG         | Mivolis      | Magnesium                             | 20                | 82               | 4.1               | 45                 | 2.3                 |
|                                         |              | VitaminB12                            | 20                | 82               | 4.1               | 45                 | 2.3                 |
|                                         |              | Calcium                               | 20                | 82               | 4.1               | 45                 | 2.3                 |
|                                         |              | Multi-Mineral                         | 20                | 82               | 4.1               | 45                 | 2.3                 |
|                                         |              | VitaminC                              | 20                | 82               | 4.1               | 45                 | 2.3                 |
|                                         | Kneipp       | Magnesium+ Calcium+ D3                | 20                | 90               | 4.5               | 245                | 12.3                |
| Müller Handels GmbH & Co. KG            | Kneipp       | Frauen Mineralstoffe                  | 15                | 94               | 6.3               | 345                | 23.0                |
|                                         |              | Männer Mineralstoffe                  | 15                | 84               | 5.6               | 399                | 26.6                |
|                                         | Abtei        | Magnesium400 Plus Vitamin C+E         | 15                | 81               | 5.4               | 295                | 19.7                |
|                                         |              | Magnesium+ Kalium Aktiv Plus          | 15                | 82.5             | 5.5               | 275                | 18.3                |
|                                         | Sanotact     | Recovery+ Aminosäuren                 | 15                | 79.5             | 5.3               | 295                | 19.7                |
|                                         | Doppelherz   | VitaminC+ Zink                        | 15                | 94.5             | 6.3               | 295                | 19.7                |
|                                         |              | VitaminD3 2000 IE                     | 15                | 97.5             | 6.5               | 275                | 18.3                |
|                                         |              | A-Z Multivitamin+ Mineralien          | 15                | 93               | 6.2               | 279                | 18.6                |
| Magnesium 400                           |              | 15                                    | 97.5              | 6.5              | 275               | 18.3               |                     |

|  |             |                         |             |      |      |     |      |
|--|-------------|-------------------------|-------------|------|------|-----|------|
|  |             | Magnesium+ Calcium+ D3  | 15          | 97.5 | 6.5  | 279 | 18.6 |
|  |             | Magnesium 500+ B12      | 15          | 97.5 | 6.5  | 249 | 16.6 |
|  |             | Magnesium+ Kalium Sport | 15          | 99   | 6.6  | 299 | 19.9 |
|  | Fit + Vital | Caclium+ D3             | 20          | 80   | 4.0  | 139 | 7.0  |
|  |             | Multivitamin            | 20          | 80   | 4.0  | 45  | 2.3  |
|  |             | Vitamin C1000           | 15          | 93   | 6.2  | 139 | 9.3  |
|  |             | Multivitamin+ Mineral   | 20          | 80   | 4.0  | 45  | 2.3  |
|  |             | Magnesium               | 20          | 80   | 4.0  | 45  | 2.3  |
|  |             | Eisen+ VitaminC         | 20          | 80   | 4.0  | 139 | 7.0  |
|  |             | Caclium 1000            | 15          | 93   | 6.2  | 45  | 3.0  |
|  |             | Magnesium 400           | 15          | 81   | 5.4  | 45  | 3.0  |
|  |             | SilaVit                 | Immun Aktiv | 20   | 84   | 4.2 | 139  |
|  | Vitamin B12 |                         | 20          | 80   | 4.0  | 125 | 6.3  |
|  | Vitamin C   |                         | 20          | 80   | 4.0  | 45  | 2.3  |
|  | Isostar     | Hydrate & Perform       | 10          | 120  | 12.0 | 399 | 39.9 |

Supplement table 2. Sodium content of the included products from the United States of America.

| Brand name®                                               | Manufacturer            | Category | Sodium content/tablet (mg) |
|-----------------------------------------------------------|-------------------------|----------|----------------------------|
| ActivJoint Tangerine                                      | Trace Minerals Research | Other    | 155                        |
| Advanced Anti-Aging Formula Effervescent Drink Mix Orange | TimeFighters            | Other    | 55                         |
| Airborne Dual Action Citrus                               | Airborne                | Vitamin  | 230                        |
| Airborne Elderberry Effervescent Tablets                  | Airborne                | Mineral  | 230                        |
| Airborne Immune Support Effervescent Tablets              | Airborne                | Vitamin  | 230                        |
| Airborne Vitamin C Original Lemon Lime                    | Airborne                | Vitamin  | 230                        |
| Airborne Zesty Orange                                     | Airborne                | Mineral  | 150                        |
| Alka-Seltzer Plus Immunity Complex                        | Bayer                   | Vitamin  | 313                        |
| Amino X Fruit Punch                                       | BSN                     | Other    | 160                        |
| AngiNOX Natural Orange Flavor                             | XYMOGEN                 | Other    | 220                        |
| Berocca Orange Flavor                                     | Bayer                   | Energy   | 260                        |
| Best Defense Orange Boost                                 | Herbalife Nutrition     | Vitamin  | 115                        |
| BetaBoost + Vitamin C Citrus                              | Airborne Advanced       | Vitamin  | 240                        |
| Carni-Fizz Natural Lemon Lime Flavor                      | Body Fizzics            | Other    | 245                        |
| CuraMed Natural Tangerine Flavor                          | Terry Naturally         | Other    | 130                        |

|                                                                     |                         |         |     |
|---------------------------------------------------------------------|-------------------------|---------|-----|
| CuraPro 350 mg Tangerine Effervescent                               | EuroMedica              | Mineral | 130 |
| Effer-C Lemon-Lime Effervescent Drink Mix                           | NOW                     | Vitamin | 50  |
| Effervescent Effer-Energy Tropical Punch                            | NOW Sports              | Mineral | 360 |
| Effervescent Effer-Hydrate                                          | NOW Sports              | Mineral | 360 |
| Effervescent Energy Lava Lime                                       | Eruption                | Energy  | 240 |
| Effervescent Vitamin C 1000 mg Natural Orange Flavor                | Sundown Naturals        | Vitamin | 60  |
| Effervescent Vitamin C Orange Flavored                              | 365 Everyday Value      | Vitamin | 60  |
| Energyze Isotropin Lemon Flavor Effervescent                        | Newton-Everett          | Energy  | 150 |
| Energy Berry Blast                                                  | Nuun                    | Energy  | 100 |
| Ester-C Effervescent 100 mg Plus Electrolytes Natural Orange Flavor | American Health         | Vitamin | 100 |
| Ester-C Effervescent 1000 mg Natural Orange Flavor                  | NatureSmart             | Vitamin | 100 |
| Ester-C Effervescent 1000 mg Natural Raspberry                      | American Health         | Vitamin | 55  |
| Ester-C Effervescent 1000 mg Natural Raspberry Flavor               | Solgar                  | Vitamin | 40  |
| Evotest Black Cherry                                                | BSN                     | Other   | 300 |
| Garcinia Cambogia Lineatabs Passion Fruit Flavor                    | Apax                    | Other   | 190 |
| Green Superfood Detox Orange Turmeric Flavor                        | Amazing Grass           | Other   | 260 |
| Immune Oxylent Effervescent Supplement Drink                        | Immune Oxylent          | Vitamin | 90  |
| Immune Support Orange Flavor                                        | Equate                  | Vitamin | 230 |
| Immuni-V Orange Effervescent                                        | MRI Performance         | Vitamin | 85  |
| Immunity Blueberry Tangerine                                        | Nuun                    | Vitamin | 100 |
| Isotropin Rejuvenation Tangerine Flavor                             | NewtonEverett           | Other   | 255 |
| Liftoff Tropical Fruit Force                                        | Herbalife Nutrition     | Vitamin | 230 |
| Lineatabs                                                           | Apax                    | Other   | 270 |
| Nuun Active Fruit Punch                                             | Nuun                    | Vitamin | 360 |
| Nuun Hydration Tri-Berry                                            | Nuun                    | Mineral | 360 |
| POW Berry-Melon Fizz                                                | EBOOST                  | Energy  | 190 |
| POW Berry-Melon Fizz                                                | EBOOST                  | Energy  | 155 |
| Power Pak Cranberry                                                 | Trace Minerals Research | Vitamin | 175 |
| Pumped Edge Fruit Punch                                             | BSN                     | Other   | 200 |
| Sambucus Fizzy Berry Flavored                                       | Nature's Way            | Other   | 160 |
| Sport +Caffeine Fresh Lime                                          | Nuun                    | Energy  | 300 |
| Sport Fruit Punch                                                   | Nuun                    | Mineral | 300 |
| Sport Oxylent 3-In-1 Performance Supplement Drink Blueberry Burst   | Sport Oxylent           | Mineral | 90  |
| Vitamins Blueberry Pomegranate                                      | Nuun                    | Vitamin | 100 |
| Wal-Born Orange Flavor                                              | Well At Walgreens       | Other   | 230 |
| ZYM Electrolyte Drink Tablets                                       | ZYM                     | Mineral | 250 |

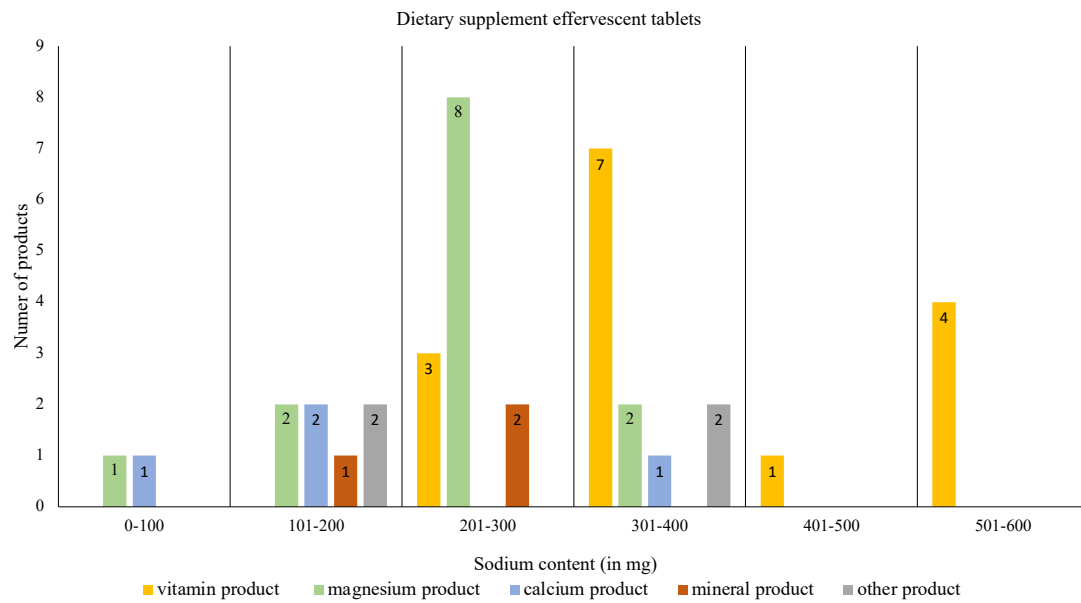

Supplement figure 1. Number of different German dietary supplement effervescent tablets that contain a certain amount of sodium (classified in 100 mg increments).

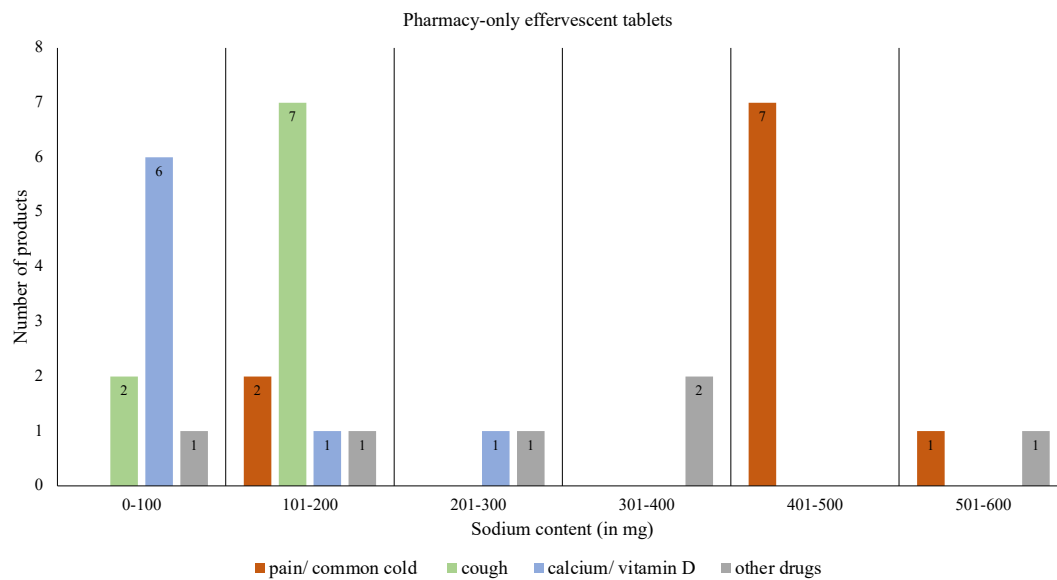

Supplement figure 2. Number of different pharmacy-only effervescent tablets that contain a certain amount of sodium (classified in 100 mg increments)

**What is known ?**

- Dietary sodium intake → BP ↑ and CV events ↑
- Recommended daily sodium intake: < 2000 mg
- ETs contain high amounts of sodium (often not labeled)
- approx. 30% of the population regularly consume ETs as dietary supplements and/or drugs

**Dietary supplement ETs**

- 39 included
- Average sodium content: 283.9±122.6 mg → 4-28% of the RDSI
- Highest average sodium content: vitamin products (378.3±112.8 mg)
- Lowest average sodium content: calcium products (170.4±113.2 mg)
- Vitamin products: more sodium than magnesium (p=0.004), calcium (p=0.006) and mineral (p=0.048) products

**Pharmacy-only ETs**

- Median sodium content: 157.0 mg (IQR: 98.9-417.3 mg) → 3-29% of the RDSI
- Highest median sodium content: pain/ common cold drugs (452.1 mg; IQR: 351.3-474.0 mg)
- Lowest median sodium content: calcium/ vitamin D drugs (87.0 mg; IQR: 52.0-103.0 mg)
- Median sodium content of the MDD of pain/ common cold drugs: 2,776.5 mg (IQR: 1,299.8-3,333.0 mg)

**Conclusion**

- ETs contain a relevant amount of sodium (often unknown or neglected)
- Additional sodium intake → poor BP control and CV events ↑
- Sodium loaded ETs should be avoided in patients at risk

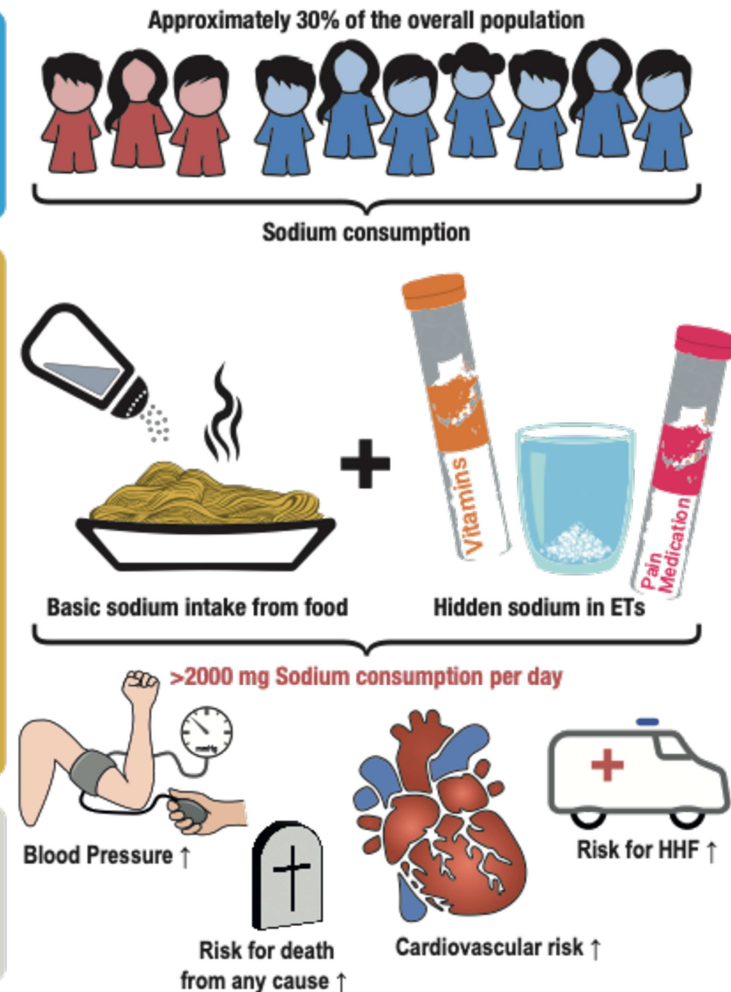

Supplement figure 3. Central illustration. BP= blood pressure; CV= cardiovascular; ET= effervescent tablets; HHF= hospitalization for acute heart failure; IQR= interquartile range; MDD= maximum daily dose; RDSI= recommended daily sodium intake.
